# Supplementary material for: Systematic Identification and Bioinformatic Analysis of MicroRNAs in Response to Infections of Coxsackievirus A16 and Enterovirus 71
Source: Biomed Res Int. 2016 Oct 24;2016:4302470. doi: 10.1155/2016/4302470 (PMC5098103; doi:10.1155/2016/4302470)
Supplement: Supplementary file 1 — Supplementary Table S1: The list of target genes of 27 common differentially expressed miRNAs predicted by TargetScan and MiRanda and corresponding GO/KEGG annotation. Supplementary Table S2: The KEGG pathways enriched in the target genes of 27 common differentially expressed miRNAs. [file 4302470.f1.xlsx]

## Sheet: Target_predict_annotation
Transcript ID	Species ID	Gene ID	Symbol	Gene Annoation	miRNA ID	TargetScan	miRanda	Total	GO Term	KEGG pathways
NM_000020	hsa	94	ACVRL1	activin A receptor type II-like 1	miR-3935	1	1	2	GO:0000166(nucleotide binding),GO:0000287(magnesium ion binding),GO:0001525(angiogenesis),GO:0001701(in utero embryonic development),GO:0004872(receptor activity),GO:0005524(ATP binding),GO:0005737(cytoplasm),GO:0005886(plasma membrane),GO:0005887(integral to plasma membrane),GO:0006468(protein amino acid phosphorylation),GO:0007162(negative regulation of cell adhesion),GO:0007165(signal transduc…	ko04060(Cytokine-cytokine receptor interaction),ko04350(TGF-beta signaling pathway)
NM_000020	hsa	94	ACVRL1	activin A receptor type II-like 1	miR-4324	1	1	2	GO:0000166(nucleotide binding),GO:0000287(magnesium ion binding),GO:0001525(angiogenesis),GO:0001701(in utero embryonic development),GO:0004872(receptor activity),GO:0005524(ATP binding),GO:0005737(cytoplasm),GO:0005886(plasma membrane),GO:0005887(integral to plasma membrane),GO:0006468(protein amino acid phosphorylation),GO:0007162(negative regulation of cell adhesion),GO:0007165(signal transduc…	ko04060(Cytokine-cytokine receptor interaction),ko04350(TGF-beta signaling pathway)
NM_000020	hsa	94	ACVRL1	activin A receptor type II-like 1	miR-5096	1	1	2	GO:0000166(nucleotide binding),GO:0000287(magnesium ion binding),GO:0001525(angiogenesis),GO:0001701(in utero embryonic development),GO:0004872(receptor activity),GO:0005524(ATP binding),GO:0005737(cytoplasm),GO:0005886(plasma membrane),GO:0005887(integral to plasma membrane),GO:0006468(protein amino acid phosphorylation),GO:0007162(negative regulation of cell adhesion),GO:0007165(signal transduc…	ko04060(Cytokine-cytokine receptor interaction),ko04350(TGF-beta signaling pathway)
NM_000021	hsa	5663	PSEN1	presenilin 1	miR-103a	1	1	2	GO:0000045(autophagic vacuole formation),GO:0000186(activation of MAPKK activity),GO:0000776(kinetochore),GO:0001568(blood vessel development),GO:0001708(cell fate specification),GO:0001756(somitogenesis),GO:0001764(neuron migration),GO:0001933(negative regulation of protein amino acid phosphorylation),GO:0001934(positive regulation of protein amino acid phosphorylation),GO:0001947(heart looping)…	ko04310(Wnt signaling pathway),ko04330(Notch signaling pathway),ko04722(Neurotrophin signaling pathway),ko05010(Alzheimer's disease)
NM_000021	hsa	5663	PSEN1	presenilin 1	miR-107	1	1	2	GO:0000045(autophagic vacuole formation),GO:0000186(activation of MAPKK activity),GO:0000776(kinetochore),GO:0001568(blood vessel development),GO:0001708(cell fate specification),GO:0001756(somitogenesis),GO:0001764(neuron migration),GO:0001933(negative regulation of protein amino acid phosphorylation),GO:0001934(positive regulation of protein amino acid phosphorylation),GO:0001947(heart looping)…	ko04310(Wnt signaling pathway),ko04330(Notch signaling pathway),ko04722(Neurotrophin signaling pathway),ko05010(Alzheimer's disease)
NM_000021	hsa	5663	PSEN1	presenilin 1	miR-3591-3p	1	1	2	GO:0000045(autophagic vacuole formation),GO:0000186(activation of MAPKK activity),GO:0000776(kinetochore),GO:0001568(blood vessel development),GO:0001708(cell fate specification),GO:0001756(somitogenesis),GO:0001764(neuron migration),GO:0001933(negative regulation of protein amino acid phosphorylation),GO:0001934(positive regulation of protein amino acid phosphorylation),GO:0001947(heart looping)…	ko04310(Wnt signaling pathway),ko04330(Notch signaling pathway),ko04722(Neurotrophin signaling pathway),ko05010(Alzheimer's disease)
NM_000021	hsa	5663	PSEN1	presenilin 1	miR-3665	1	1	2	GO:0000045(autophagic vacuole formation),GO:0000186(activation of MAPKK activity),GO:0000776(kinetochore),GO:0001568(blood vessel development),GO:0001708(cell fate specification),GO:0001756(somitogenesis),GO:0001764(neuron migration),GO:0001933(negative regulation of protein amino acid phosphorylation),GO:0001934(positive regulation of protein amino acid phosphorylation),GO:0001947(heart looping)…	ko04310(Wnt signaling pathway),ko04330(Notch signaling pathway),ko04722(Neurotrophin signaling pathway),ko05010(Alzheimer's disease)
NM_000021	hsa	5663	PSEN1	presenilin 1	miR-4324	1	1	2	GO:0000045(autophagic vacuole formation),GO:0000186(activation of MAPKK activity),GO:0000776(kinetochore),GO:0001568(blood vessel development),GO:0001708(cell fate specification),GO:0001756(somitogenesis),GO:0001764(neuron migration),GO:0001933(negative regulation of protein amino acid phosphorylation),GO:0001934(positive regulation of protein amino acid phosphorylation),GO:0001947(heart looping)…	ko04310(Wnt signaling pathway),ko04330(Notch signaling pathway),ko04722(Neurotrophin signaling pathway),ko05010(Alzheimer's disease)
NM_000021	hsa	5663	PSEN1	presenilin 1	miR-4687-3p	1	1	2	GO:0000045(autophagic vacuole formation),GO:0000186(activation of MAPKK activity),GO:0000776(kinetochore),GO:0001568(blood vessel development),GO:0001708(cell fate specification),GO:0001756(somitogenesis),GO:0001764(neuron migration),GO:0001933(negative regulation of protein amino acid phosphorylation),GO:0001934(positive regulation of protein amino acid phosphorylation),GO:0001947(heart looping)…	ko04310(Wnt signaling pathway),ko04330(Notch signaling pathway),ko04722(Neurotrophin signaling pathway),ko05010(Alzheimer's disease)
NM_000021	hsa	5663	PSEN1	presenilin 1	miR-494	1	1	2	GO:0000045(autophagic vacuole formation),GO:0000186(activation of MAPKK activity),GO:0000776(kinetochore),GO:0001568(blood vessel development),GO:0001708(cell fate specification),GO:0001756(somitogenesis),GO:0001764(neuron migration),GO:0001933(negative regulation of protein amino acid phosphorylation),GO:0001934(positive regulation of protein amino acid phosphorylation),GO:0001947(heart looping)…	ko04310(Wnt signaling pathway),ko04330(Notch signaling pathway),ko04722(Neurotrophin signaling pathway),ko05010(Alzheimer's disease)
NM_000023	hsa	6442	SGCA	sarcoglycan, alpha (50kDa dystrophin-associated glycoprotein)	miR-3665	1	1	2	GO:0005509(calcium ion binding),GO:0005515(protein binding),GO:0005737(cytoplasm),GO:0005856(cytoskeleton),GO:0006936(muscle contraction),GO:0007517(muscle organ development),GO:0016010(dystrophin-associated glycoprotein complex),GO:0016012(sarcoglycan complex),GO:0016021(integral to membrane),GO:0042383(sarcolemma),GO:0045121(membrane raft)	ko05410(Hypertrophic cardiomyopathy (HCM)),ko05412(Arrhythmogenic right ventricular cardiomyopathy (ARVC)),ko05414(Dilated cardiomyopathy),ko05416(Viral myocarditis)
NM_000023	hsa	6442	SGCA	sarcoglycan, alpha (50kDa dystrophin-associated glycoprotein)	miR-4530	1	1	2	GO:0005509(calcium ion binding),GO:0005515(protein binding),GO:0005737(cytoplasm),GO:0005856(cytoskeleton),GO:0006936(muscle contraction),GO:0007517(muscle organ development),GO:0016010(dystrophin-associated glycoprotein complex),GO:0016012(sarcoglycan complex),GO:0016021(integral to membrane),GO:0042383(sarcolemma),GO:0045121(membrane raft)	ko05410(Hypertrophic cardiomyopathy (HCM)),ko05412(Arrhythmogenic right ventricular cardiomyopathy (ARVC)),ko05414(Dilated cardiomyopathy),ko05416(Viral myocarditis)
NM_000024	hsa	154	ADRB2	adrenergic, beta-2-, receptor, surface	miR-4530	1	1	2	GO:0002024(diet induced thermogenesis),GO:0002025(vasodilation by norepinephrine-epinephrine involved in regulation of systemic arterial blood pressure),GO:0002032(desensitization of G-protein coupled receptor protein signaling pathway by arrestin),GO:0004872(receptor activity),GO:0004930(G-protein coupled receptor activity),GO:0004935(adrenoceptor activity),GO:0004941(beta2-adrenergic receptor a…	ko04020(Calcium signaling pathway),ko04080(Neuroactive ligand-receptor interaction),ko04144(Endocytosis)
NM_000028	hsa	178	AGL	amylo-1, 6-glucosidase, 4-alpha-glucanotransferase	miR-1246	1	1	2	GO:0004134(4-alpha-glucanotransferase activity),GO:0004135(amylo-alpha-1,6-glucosidase activity),GO:0005515(protein binding),GO:0005634(nucleus),GO:0005737(cytoplasm),GO:0005829(cytosol),GO:0005975(carbohydrate metabolic process),GO:0005978(glycogen biosynthetic process),GO:0008152(metabolic process),GO:0016234(inclusion body),GO:0016757(transferase activity, transferring glycosyl groups),GO:0016…	ko00500(Starch and sucrose metabolism),ko01100(Metabolic pathways)
NM_000028	hsa	178	AGL	amylo-1, 6-glucosidase, 4-alpha-glucanotransferase	miR-23c	1	1	2	GO:0004134(4-alpha-glucanotransferase activity),GO:0004135(amylo-alpha-1,6-glucosidase activity),GO:0005515(protein binding),GO:0005634(nucleus),GO:0005737(cytoplasm),GO:0005829(cytosol),GO:0005975(carbohydrate metabolic process),GO:0005978(glycogen biosynthetic process),GO:0008152(metabolic process),GO:0016234(inclusion body),GO:0016757(transferase activity, transferring glycosyl groups),GO:0016…	ko00500(Starch and sucrose metabolism),ko01100(Metabolic pathways)
NM_000029	hsa	183	AGT	angiotensinogen (serpin peptidase inhibitor, clade A, member 8)	miR-181d	1	1	2	GO:0001543(ovarian follicle rupture),GO:0001568(blood vessel development),GO:0001658(branching involved in ureteric bud morphogenesis),GO:0001819(positive regulation of cytokine production),GO:0001822(kidney development),GO:0001974(blood vessel remodeling),GO:0001998(angiotensin mediated vasoconstriction involved in regulation of systemic arterial blood pressure),GO:0001999(renal response to bloo…	ko04270(Vascular smooth muscle contraction),ko04614(Renin-angiotensin system),ko05410(Hypertrophic cardiomyopathy (HCM))
NM_000029	hsa	183	AGT	angiotensinogen (serpin peptidase inhibitor, clade A, member 8)	miR-4443	1	1	2	GO:0001543(ovarian follicle rupture),GO:0001568(blood vessel development),GO:0001658(branching involved in ureteric bud morphogenesis),GO:0001819(positive regulation of cytokine production),GO:0001822(kidney development),GO:0001974(blood vessel remodeling),GO:0001998(angiotensin mediated vasoconstriction involved in regulation of systemic arterial blood pressure),GO:0001999(renal response to bloo…	ko04270(Vascular smooth muscle contraction),ko04614(Renin-angiotensin system),ko05410(Hypertrophic cardiomyopathy (HCM))
NM_000031	hsa	210	ALAD	aminolevulinate, delta-, dehydratase	miR-103a	1	1	2	GO:0004655(porphobilinogen synthase activity),GO:0005829(cytosol),GO:0006783(heme biosynthetic process),GO:0008152(metabolic process),GO:0008270(zinc ion binding),GO:0016829(lyase activity),GO:0046872(metal ion binding)	ko00860(Porphyrin and chlorophyll metabolism),ko01100(Metabolic pathways)
NM_000031	hsa	210	ALAD	aminolevulinate, delta-, dehydratase	miR-107	1	1	2	GO:0004655(porphobilinogen synthase activity),GO:0005829(cytosol),GO:0006783(heme biosynthetic process),GO:0008152(metabolic process),GO:0008270(zinc ion binding),GO:0016829(lyase activity),GO:0046872(metal ion binding)	ko00860(Porphyrin and chlorophyll metabolism),ko01100(Metabolic pathways)
NM_000031	hsa	210	ALAD	aminolevulinate, delta-, dehydratase	miR-4277	1	1	2	GO:0004655(porphobilinogen synthase activity),GO:0005829(cytosol),GO:0006783(heme biosynthetic process),GO:0008152(metabolic process),GO:0008270(zinc ion binding),GO:0016829(lyase activity),GO:0046872(metal ion binding)	ko00860(Porphyrin and chlorophyll metabolism),ko01100(Metabolic pathways)
NM_000031	hsa	210	ALAD	aminolevulinate, delta-, dehydratase	miR-4687-3p	1	1	2	GO:0004655(porphobilinogen synthase activity),GO:0005829(cytosol),GO:0006783(heme biosynthetic process),GO:0008152(metabolic process),GO:0008270(zinc ion binding),GO:0016829(lyase activity),GO:0046872(metal ion binding)	ko00860(Porphyrin and chlorophyll metabolism),ko01100(Metabolic pathways)
NM_000032	hsa	212	ALAS2	aminolevulinate, delta-, synthase 2	miR-3665	1	1	2	GO:0001666(response to hypoxia),GO:0003870(5-aminolevulinate synthase activity),GO:0005515(protein binding),GO:0005739(mitochondrion),GO:0005743(mitochondrial inner membrane),GO:0005759(mitochondrial matrix),GO:0006778(porphyrin metabolic process),GO:0006783(heme biosynthetic process),GO:0006879(cellular iron ion homeostasis),GO:0008415(acyltransferase activity),GO:0009058(biosynthetic process),G…	ko00260(Glycine,ko serine and threonine metabolism),ko00860(Porphyrin and chlorophyll metabolism),ko01100(Metabolic pathways)
NM_000033	hsa	215	ABCD1	ATP-binding cassette, sub-family D (ALD), member 1	miR-3665	1	1	2	GO:0000166(nucleotide binding),GO:0005215(transporter activity),GO:0005325(peroxisomal fatty acyl CoA transporter activity),GO:0005524(ATP binding),GO:0005777(peroxisome),GO:0005778(peroxisomal membrane),GO:0005779(integral to peroxisomal membrane),GO:0006810(transport),GO:0007031(peroxisome organization),GO:0015919(peroxisomal membrane transport),GO:0016020(membrane),GO:0016021(integral to membr…	ko02010(ABC transporters)
NM_000033	hsa	215	ABCD1	ATP-binding cassette, sub-family D (ALD), member 1	miR-4443	1	1	2	GO:0000166(nucleotide binding),GO:0005215(transporter activity),GO:0005325(peroxisomal fatty acyl CoA transporter activity),GO:0005524(ATP binding),GO:0005777(peroxisome),GO:0005778(peroxisomal membrane),GO:0005779(integral to peroxisomal membrane),GO:0006810(transport),GO:0007031(peroxisome organization),GO:0015919(peroxisomal membrane transport),GO:0016020(membrane),GO:0016021(integral to membr…	ko02010(ABC transporters)
NM_000035	hsa	229	ALDOB	aldolase B, fructose-bisphosphate	miR-4530	1	1	2	GO:0004332(fructose-bisphosphate aldolase activity),GO:0005634(nucleus),GO:0005737(cytoplasm),GO:0005764(lysosome),GO:0005815(microtubule organizing center),GO:0005829(cytosol),GO:0006094(gluconeogenesis),GO:0006096(glycolysis),GO:0006116(NADH oxidation),GO:0008092(cytoskeletal protein binding),GO:0008152(metabolic process),GO:0009743(response to carbohydrate stimulus),GO:0010043(response to zinc…	ko00010(Glycolysis / Gluconeogenesis),ko00030(Pentose phosphate pathway),ko00051(Fructose and mannose metabolism),ko01100(Metabolic pathways)
NM_000035	hsa	229	ALDOB	aldolase B, fructose-bisphosphate	miR-5096	1	1	2	GO:0004332(fructose-bisphosphate aldolase activity),GO:0005634(nucleus),GO:0005737(cytoplasm),GO:0005764(lysosome),GO:0005815(microtubule organizing center),GO:0005829(cytosol),GO:0006094(gluconeogenesis),GO:0006096(glycolysis),GO:0006116(NADH oxidation),GO:0008092(cytoskeletal protein binding),GO:0008152(metabolic process),GO:0009743(response to carbohydrate stimulus),GO:0010043(response to zinc…	ko00010(Glycolysis / Gluconeogenesis),ko00030(Pentose phosphate pathway),ko00051(Fructose and mannose metabolism),ko01100(Metabolic pathways)
NM_000037	hsa	286	ANK1	ankyrin 1, erythrocytic	miR-103a	1	1	2	GO:0005200(structural constituent of cytoskeleton),GO:0005737(cytoplasm),GO:0005886(plasma membrane),GO:0006887(exocytosis),GO:0007010(cytoskeleton organization),GO:0007165(signal transduction),GO:0008093(cytoskeletal adaptor activity),GO:0014731(spectrin-associated cytoskeleton),GO:0016323(basolateral plasma membrane),GO:0016529(sarcoplasmic reticulum),GO:0019899(enzyme binding),GO:0030507(spect…
NM_000037	hsa	286	ANK1	ankyrin 1, erythrocytic	miR-107	1	1	2	GO:0005200(structural constituent of cytoskeleton),GO:0005737(cytoplasm),GO:0005886(plasma membrane),GO:0006887(exocytosis),GO:0007010(cytoskeleton organization),GO:0007165(signal transduction),GO:0008093(cytoskeletal adaptor activity),GO:0014731(spectrin-associated cytoskeleton),GO:0016323(basolateral plasma membrane),GO:0016529(sarcoplasmic reticulum),GO:0019899(enzyme binding),GO:0030507(spect…
NM_000037	hsa	286	ANK1	ankyrin 1, erythrocytic	miR-4443	1	1	2	GO:0005200(structural constituent of cytoskeleton),GO:0005737(cytoplasm),GO:0005886(plasma membrane),GO:0006887(exocytosis),GO:0007010(cytoskeleton organization),GO:0007165(signal transduction),GO:0008093(cytoskeletal adaptor activity),GO:0014731(spectrin-associated cytoskeleton),GO:0016323(basolateral plasma membrane),GO:0016529(sarcoplasmic reticulum),GO:0019899(enzyme binding),GO:0030507(spect…
NM_000038	hsa	324	APC	adenomatous polyposis coli	miR-3935	1	1	2	GO:0000281(cytokinesis after mitosis),GO:0000776(kinetochore),GO:0001822(kidney development),GO:0001942(hair follicle development),GO:0005634(nucleus),GO:0005737(cytoplasm),GO:0005813(centrosome),GO:0005829(cytosol),GO:0005881(cytoplasmic microtubule),GO:0005913(cell-cell adherens junction),GO:0005923(tight junction),GO:0006461(protein complex assembly),GO:0006974(response to DNA damage stimulus)…	ko04310(Wnt signaling pathway),ko04810(Regulation of actin cytoskeleton),ko05200(Pathways in cancer),ko05210(Colorectal cancer),ko05213(Endometrial cancer),ko05217(Basal cell carcinoma)
NM_000038	hsa	324	APC	adenomatous polyposis coli	miR-494	1	1	2	GO:0000281(cytokinesis after mitosis),GO:0000776(kinetochore),GO:0001822(kidney development),GO:0001942(hair follicle development),GO:0005634(nucleus),GO:0005737(cytoplasm),GO:0005813(centrosome),GO:0005829(cytosol),GO:0005881(cytoplasmic microtubule),GO:0005913(cell-cell adherens junction),GO:0005923(tight junction),GO:0006461(protein complex assembly),GO:0006974(response to DNA damage stimulus)…	ko04310(Wnt signaling pathway),ko04810(Regulation of actin cytoskeleton),ko05200(Pathways in cancer),ko05210(Colorectal cancer),ko05213(Endometrial cancer),ko05217(Basal cell carcinoma)
NM_000040	hsa	345	APOC3	apolipoprotein C-III	miR-3665	1	1	2	GO:0005543(phospholipid binding),GO:0005576(extracellular region),GO:0005615(extracellular space),GO:0006642(triglyceride mobilization),GO:0006869(lipid transport),GO:0007186(G-protein coupled receptor protein signaling pathway),GO:0008203(cholesterol metabolic process),GO:0010897(negative regulation of triglyceride catabolic process),GO:0010903(negative regulation of very-low-density lipoprotein…	ko03320(PPAR signaling pathway)
NM_000043	hsa	355	FAS	Fas (TNF receptor superfamily, member 6)	miR-181d	1	1	2	GO:0004888(transmembrane receptor activity),GO:0005576(extracellular region),GO:0005625(soluble fraction),GO:0005829(cytosol),GO:0005886(plasma membrane),GO:0006461(protein complex assembly),GO:0006916(anti-apoptosis),GO:0006955(immune response),GO:0007165(signal transduction),GO:0008624(induction of apoptosis by extracellular signals),GO:0008633(activation of pro-apoptotic gene products),GO:0010…	ko04010(MAPK signaling pathway),ko04060(Cytokine-cytokine receptor interaction),ko04115(p53 signaling pathway),ko04210(Apoptosis),ko04650(Natural killer cell mediated cytotoxicity),ko04940(Type I diabetes mellitus),ko05010(Alzheimer's disease),ko05200(Pathways in cancer),ko05320(Autoimmune thyroid disease),ko05330(Allograft rejection),ko05332(Graft-versus-host disease)
NM_000043	hsa	355	FAS	Fas (TNF receptor superfamily, member 6)	miR-19b	1	1	2	GO:0004888(transmembrane receptor activity),GO:0005576(extracellular region),GO:0005625(soluble fraction),GO:0005829(cytosol),GO:0005886(plasma membrane),GO:0006461(protein complex assembly),GO:0006916(anti-apoptosis),GO:0006955(immune response),GO:0007165(signal transduction),GO:0008624(induction of apoptosis by extracellular signals),GO:0008633(activation of pro-apoptotic gene products),GO:0010…	ko04010(MAPK signaling pathway),ko04060(Cytokine-cytokine receptor interaction),ko04115(p53 signaling pathway),ko04210(Apoptosis),ko04650(Natural killer cell mediated cytotoxicity),ko04940(Type I diabetes mellitus),ko05010(Alzheimer's disease),ko05200(Pathways in cancer),ko05320(Autoimmune thyroid disease),ko05330(Allograft rejection),ko05332(Graft-versus-host disease)
NM_000043	hsa	355	FAS	Fas (TNF receptor superfamily, member 6)	miR-23c	1	1	2	GO:0004888(transmembrane receptor activity),GO:0005576(extracellular region),GO:0005625(soluble fraction),GO:0005829(cytosol),GO:0005886(plasma membrane),GO:0006461(protein complex assembly),GO:0006916(anti-apoptosis),GO:0006955(immune response),GO:0007165(signal transduction),GO:0008624(induction of apoptosis by extracellular signals),GO:0008633(activation of pro-apoptotic gene products),GO:0010…	ko04010(MAPK signaling pathway),ko04060(Cytokine-cytokine receptor interaction),ko04115(p53 signaling pathway),ko04210(Apoptosis),ko04650(Natural killer cell mediated cytotoxicity),ko04940(Type I diabetes mellitus),ko05010(Alzheimer's disease),ko05200(Pathways in cancer),ko05320(Autoimmune thyroid disease),ko05330(Allograft rejection),ko05332(Graft-versus-host disease)
NM_000043	hsa	355	FAS	Fas (TNF receptor superfamily, member 6)	miR-4324	1	1	2	GO:0004888(transmembrane receptor activity),GO:0005576(extracellular region),GO:0005625(soluble fraction),GO:0005829(cytosol),GO:0005886(plasma membrane),GO:0006461(protein complex assembly),GO:0006916(anti-apoptosis),GO:0006955(immune response),GO:0007165(signal transduction),GO:0008624(induction of apoptosis by extracellular signals),GO:0008633(activation of pro-apoptotic gene products),GO:0010…	ko04010(MAPK signaling pathway),ko04060(Cytokine-cytokine receptor interaction),ko04115(p53 signaling pathway),ko04210(Apoptosis),ko04650(Natural killer cell mediated cytotoxicity),ko04940(Type I diabetes mellitus),ko05010(Alzheimer's disease),ko05200(Pathways in cancer),ko05320(Autoimmune thyroid disease),ko05330(Allograft rejection),ko05332(Graft-versus-host disease)
NM_000043	hsa	355	FAS	Fas (TNF receptor superfamily, member 6)	miR-4443	1	1	2	GO:0004888(transmembrane receptor activity),GO:0005576(extracellular region),GO:0005625(soluble fraction),GO:0005829(cytosol),GO:0005886(plasma membrane),GO:0006461(protein complex assembly),GO:0006916(anti-apoptosis),GO:0006955(immune response),GO:0007165(signal transduction),GO:0008624(induction of apoptosis by extracellular signals),GO:0008633(activation of pro-apoptotic gene products),GO:0010…	ko04010(MAPK signaling pathway),ko04060(Cytokine-cytokine receptor interaction),ko04115(p53 signaling pathway),ko04210(Apoptosis),ko04650(Natural killer cell mediated cytotoxicity),ko04940(Type I diabetes mellitus),ko05010(Alzheimer's disease),ko05200(Pathways in cancer),ko05320(Autoimmune thyroid disease),ko05330(Allograft rejection),ko05332(Graft-versus-host disease)
NM_000044	hsa	367	AR	androgen receptor	miR-30b	1	1	2	GO:0001701(in utero embryonic development),GO:0003700(transcription factor activity),GO:0004872(receptor activity),GO:0004882(androgen receptor activity),GO:0005102(receptor binding),GO:0005497(androgen binding),GO:0005634(nucleus),GO:0005737(cytoplasm),GO:0006810(transport),GO:0007165(signal transduction),GO:0007267(cell-cell signaling),GO:0008219(cell death),GO:0008270(zinc ion binding),GO:0008…	ko04114(Oocyte meiosis),ko05200(Pathways in cancer),ko05215(Prostate cancer)
NM_000044	hsa	367	AR	androgen receptor	miR-3591-3p	1	1	2	GO:0001701(in utero embryonic development),GO:0003700(transcription factor activity),GO:0004872(receptor activity),GO:0004882(androgen receptor activity),GO:0005102(receptor binding),GO:0005497(androgen binding),GO:0005634(nucleus),GO:0005737(cytoplasm),GO:0006810(transport),GO:0007165(signal transduction),GO:0007267(cell-cell signaling),GO:0008219(cell death),GO:0008270(zinc ion binding),GO:0008…	ko04114(Oocyte meiosis),ko05200(Pathways in cancer),ko05215(Prostate cancer)
NM_000045	hsa	383	ARG1	arginase, liver	miR-23c	1	1	2	GO:0000050(urea cycle),GO:0004053(arginase activity),GO:0005737(cytoplasm),GO:0006527(arginine catabolic process),GO:0016787(hydrolase activity),GO:0030145(manganese ion binding),GO:0046872(metal ion binding)	ko00330(Arginine and proline metabolism),ko01100(Metabolic pathways)
NM_000046	hsa	411	ARSB	arylsulfatase B	miR-3665	1	1	2	GO:0003943(N-acetylgalactosamine-4-sulfatase activity),GO:0004065(arylsulfatase activity),GO:0005509(calcium ion binding),GO:0005739(mitochondrion),GO:0005764(lysosome),GO:0005791(rough endoplasmic reticulum),GO:0005794(Golgi apparatus),GO:0006914(autophagy),GO:0007040(lysosome organization),GO:0007041(lysosomal transport),GO:0007417(central nervous system development),GO:0007584(response to nutr…	ko00531(Glycosaminoglycan degradation),ko01100(Metabolic pathways),ko04142(Lysosome)
NM_000046	hsa	411	ARSB	arylsulfatase B	miR-720	1	1	2	GO:0003943(N-acetylgalactosamine-4-sulfatase activity),GO:0004065(arylsulfatase activity),GO:0005509(calcium ion binding),GO:0005739(mitochondrion),GO:0005764(lysosome),GO:0005791(rough endoplasmic reticulum),GO:0005794(Golgi apparatus),GO:0006914(autophagy),GO:0007040(lysosome organization),GO:0007041(lysosomal transport),GO:0007417(central nervous system development),GO:0007584(response to nutr…	ko00531(Glycosaminoglycan degradation),ko01100(Metabolic pathways),ko04142(Lysosome)
NM_000049	hsa	443	ASPA	aspartoacylase (Canavan disease)	miR-4687-3p	1	1	2	GO:0004046(aminoacylase activity),GO:0005634(nucleus),GO:0005737(cytoplasm),GO:0006533(aspartate catabolic process),GO:0008152(metabolic process),GO:0008270(zinc ion binding),GO:0016788(hydrolase activity, acting on ester bonds),GO:0019807(aspartoacylase activity),GO:0046872(metal ion binding)	ko00250(Alanine,ko aspartate and glutamate metabolism),ko00340(Histidine metabolism)
NM_000051	hsa	472	ATM	ataxia telangiectasia mutated	miR-181d	1	1	2	GO:0000166(nucleotide binding),GO:0000781(chromosome, telomeric region),GO:0001756(somitogenesis),GO:0003677(DNA binding),GO:0004677(DNA-dependent protein kinase activity),GO:0005524(ATP binding),GO:0005634(nucleus),GO:0005654(nucleoplasm),GO:0005819(spindle),GO:0006281(DNA repair),GO:0006974(response to DNA damage stimulus),GO:0007049(cell cycle),GO:0007050(cell cycle arrest),GO:0007094(mitotic …	ko04110(Cell cycle),ko04115(p53 signaling pathway),ko04210(Apoptosis)
NM_000051	hsa	472	ATM	ataxia telangiectasia mutated	miR-4530	1	1	2	GO:0000166(nucleotide binding),GO:0000781(chromosome, telomeric region),GO:0001756(somitogenesis),GO:0003677(DNA binding),GO:0004677(DNA-dependent protein kinase activity),GO:0005524(ATP binding),GO:0005634(nucleus),GO:0005654(nucleoplasm),GO:0005819(spindle),GO:0006281(DNA repair),GO:0006974(response to DNA damage stimulus),GO:0007049(cell cycle),GO:0007050(cell cycle arrest),GO:0007094(mitotic …	ko04110(Cell cycle),ko04115(p53 signaling pathway),ko04210(Apoptosis)
NM_000051	hsa	472	ATM	ataxia telangiectasia mutated	miR-4534	1	1	2	GO:0000166(nucleotide binding),GO:0000781(chromosome, telomeric region),GO:0001756(somitogenesis),GO:0003677(DNA binding),GO:0004677(DNA-dependent protein kinase activity),GO:0005524(ATP binding),GO:0005634(nucleus),GO:0005654(nucleoplasm),GO:0005819(spindle),GO:0006281(DNA repair),GO:0006974(response to DNA damage stimulus),GO:0007049(cell cycle),GO:0007050(cell cycle arrest),GO:0007094(mitotic …	ko04110(Cell cycle),ko04115(p53 signaling pathway),ko04210(Apoptosis)
NM_000051	hsa	472	ATM	ataxia telangiectasia mutated	miR-5096	1	1	2	GO:0000166(nucleotide binding),GO:0000781(chromosome, telomeric region),GO:0001756(somitogenesis),GO:0003677(DNA binding),GO:0004677(DNA-dependent protein kinase activity),GO:0005524(ATP binding),GO:0005634(nucleus),GO:0005654(nucleoplasm),GO:0005819(spindle),GO:0006281(DNA repair),GO:0006974(response to DNA damage stimulus),GO:0007049(cell cycle),GO:0007050(cell cycle arrest),GO:0007094(mitotic …	ko04110(Cell cycle),ko04115(p53 signaling pathway),ko04210(Apoptosis)
NM_000052	hsa	538	ATP7A	ATPase, Cu++ transporting, alpha polypeptide	miR-320a	1	1	2	GO:0000166(nucleotide binding),GO:0000287(magnesium ion binding),GO:0001568(blood vessel development),GO:0001974(blood vessel remodeling),GO:0002082(regulation of oxidative phosphorylation),GO:0004008(copper-exporting ATPase activity),GO:0005375(copper ion transmembrane transporter activity),GO:0005507(copper ion binding),GO:0005524(ATP binding),GO:0005737(cytoplasm),GO:0005770(late endosome),GO:…
NM_000052	hsa	538	ATP7A	ATPase, Cu++ transporting, alpha polypeptide	miR-320b	1	1	2	GO:0000166(nucleotide binding),GO:0000287(magnesium ion binding),GO:0001568(blood vessel development),GO:0001974(blood vessel remodeling),GO:0002082(regulation of oxidative phosphorylation),GO:0004008(copper-exporting ATPase activity),GO:0005375(copper ion transmembrane transporter activity),GO:0005507(copper ion binding),GO:0005524(ATP binding),GO:0005737(cytoplasm),GO:0005770(late endosome),GO:…
NM_000052	hsa	538	ATP7A	ATPase, Cu++ transporting, alpha polypeptide	miR-320c	1	1	2	GO:0000166(nucleotide binding),GO:0000287(magnesium ion binding),GO:0001568(blood vessel development),GO:0001974(blood vessel remodeling),GO:0002082(regulation of oxidative phosphorylation),GO:0004008(copper-exporting ATPase activity),GO:0005375(copper ion transmembrane transporter activity),GO:0005507(copper ion binding),GO:0005524(ATP binding),GO:0005737(cytoplasm),GO:0005770(late endosome),GO:…
NM_000053	hsa	540	ATP7B	ATPase, Cu++ transporting, beta polypeptide	miR-4443	1	1	2	GO:0000166(nucleotide binding),GO:0000287(magnesium ion binding),GO:0004008(copper-exporting ATPase activity),GO:0005507(copper ion binding),GO:0005515(protein binding),GO:0005524(ATP binding),GO:0005624(membrane fraction),GO:0005737(cytoplasm),GO:0005739(mitochondrion),GO:0005770(late endosome),GO:0005794(Golgi apparatus),GO:0005802(trans-Golgi network),GO:0005887(integral to plasma membrane),GO…
NM_000053	hsa	540	ATP7B	ATPase, Cu++ transporting, beta polypeptide	miR-4734	1	1	2	GO:0000166(nucleotide binding),GO:0000287(magnesium ion binding),GO:0004008(copper-exporting ATPase activity),GO:0005507(copper ion binding),GO:0005515(protein binding),GO:0005524(ATP binding),GO:0005624(membrane fraction),GO:0005737(cytoplasm),GO:0005739(mitochondrion),GO:0005770(late endosome),GO:0005794(Golgi apparatus),GO:0005802(trans-Golgi network),GO:0005887(integral to plasma membrane),GO…
NM_000054	hsa	554	AVPR2	arginine vasopressin receptor 2	miR-4484	1	1	2	GO:0004872(receptor activity),GO:0004930(G-protein coupled receptor activity),GO:0005000(vasopressin receptor activity),GO:0005768(endosome),GO:0005783(endoplasmic reticulum),GO:0005794(Golgi apparatus),GO:0005886(plasma membrane),GO:0005887(integral to plasma membrane),GO:0007165(signal transduction),GO:0007186(G-protein coupled receptor protein signaling pathway),GO:0007188(G-protein signaling,…	ko04080(Neuroactive ligand-receptor interaction)
NM_000059	hsa	675	BRCA2	breast cancer 2, early onset	miR-1260b	1	1	2	GO:0000724(double-strand break repair via homologous recombination),GO:0001556(oocyte maturation),GO:0001833(inner cell mass cell proliferation),GO:0003697(single-stranded DNA binding),GO:0004402(histone acetyltransferase activity),GO:0005515(protein binding),GO:0005634(nucleus),GO:0005654(nucleoplasm),GO:0005737(cytoplasm),GO:0005813(centrosome),GO:0006289(nucleotide-excision repair),GO:0006310(…	ko03440(Homologous recombination),ko05200(Pathways in cancer),ko05212(Pancreatic cancer)
NM_000059	hsa	675	BRCA2	breast cancer 2, early onset	miR-3591-3p	1	1	2	GO:0000724(double-strand break repair via homologous recombination),GO:0001556(oocyte maturation),GO:0001833(inner cell mass cell proliferation),GO:0003697(single-stranded DNA binding),GO:0004402(histone acetyltransferase activity),GO:0005515(protein binding),GO:0005634(nucleus),GO:0005654(nucleoplasm),GO:0005737(cytoplasm),GO:0005813(centrosome),GO:0006289(nucleotide-excision repair),GO:0006310(…	ko03440(Homologous recombination),ko05200(Pathways in cancer),ko05212(Pancreatic cancer)
NM_000062	hsa	710	SERPING1	serpin peptidase inhibitor, clade G (C1 inhibitor), member 1	miR-320a	1	1	2	GO:0001869(negative regulation of complement activation, lectin pathway),GO:0004867(serine-type endopeptidase inhibitor activity),GO:0005515(protein binding),GO:0005576(extracellular region),GO:0006958(complement activation, classical pathway),GO:0007596(blood coagulation),GO:0008015(blood circulation),GO:0030414(peptidase inhibitor activity),GO:0031093(platelet alpha granule lumen),GO:0045087(in…	ko04610(Complement and coagulation cascades)
NM_000062	hsa	710	SERPING1	serpin peptidase inhibitor, clade G (C1 inhibitor), member 1	miR-320b	1	1	2	GO:0001869(negative regulation of complement activation, lectin pathway),GO:0004867(serine-type endopeptidase inhibitor activity),GO:0005515(protein binding),GO:0005576(extracellular region),GO:0006958(complement activation, classical pathway),GO:0007596(blood coagulation),GO:0008015(blood circulation),GO:0030414(peptidase inhibitor activity),GO:0031093(platelet alpha granule lumen),GO:0045087(in…	ko04610(Complement and coagulation cascades)
NM_000062	hsa	710	SERPING1	serpin peptidase inhibitor, clade G (C1 inhibitor), member 1	miR-320c	1	1	2	GO:0001869(negative regulation of complement activation, lectin pathway),GO:0004867(serine-type endopeptidase inhibitor activity),GO:0005515(protein binding),GO:0005576(extracellular region),GO:0006958(complement activation, classical pathway),GO:0007596(blood coagulation),GO:0008015(blood circulation),GO:0030414(peptidase inhibitor activity),GO:0031093(platelet alpha granule lumen),GO:0045087(in…	ko04610(Complement and coagulation cascades)
NM_000065	hsa	729	C6	complement component 6	miR-320a	1	1	2	GO:0001701(in utero embryonic development),GO:0005515(protein binding),GO:0005576(extracellular region),GO:0005579(membrane attack complex),GO:0005615(extracellular space),GO:0006917(induction of apoptosis),GO:0006919(activation of caspase activity),GO:0006958(complement activation, classical pathway),GO:0019835(cytolysis),GO:0045087(innate immune response)	ko04610(Complement and coagulation cascades),ko05020(Prion diseases),ko05322(Systemic lupus erythematosus)
NM_000065	hsa	729	C6	complement component 6	miR-320b	1	1	2	GO:0001701(in utero embryonic development),GO:0005515(protein binding),GO:0005576(extracellular region),GO:0005579(membrane attack complex),GO:0005615(extracellular space),GO:0006917(induction of apoptosis),GO:0006919(activation of caspase activity),GO:0006958(complement activation, classical pathway),GO:0019835(cytolysis),GO:0045087(innate immune response)	ko04610(Complement and coagulation cascades),ko05020(Prion diseases),ko05322(Systemic lupus erythematosus)
NM_000065	hsa	729	C6	complement component 6	miR-320c	1	1	2	GO:0001701(in utero embryonic development),GO:0005515(protein binding),GO:0005576(extracellular region),GO:0005579(membrane attack complex),GO:0005615(extracellular space),GO:0006917(induction of apoptosis),GO:0006919(activation of caspase activity),GO:0006958(complement activation, classical pathway),GO:0019835(cytolysis),GO:0045087(innate immune response)	ko04610(Complement and coagulation cascades),ko05020(Prion diseases),ko05322(Systemic lupus erythematosus)
NM_000067	hsa	760	CA2	carbonic anhydrase II	miR-103a	1	1	2	GO:0001822(kidney development),GO:0002009(morphogenesis of an epithelium),GO:0004089(carbonate dehydratase activity),GO:0005515(protein binding),GO:0005615(extracellular space),GO:0005634(nucleus),GO:0005737(cytoplasm),GO:0005902(microvillus),GO:0006730(one-carbon metabolic process),GO:0006950(response to stress),GO:0008270(zinc ion binding),GO:0009268(response to pH),GO:0010033(response to organ…	ko00910(Nitrogen metabolism)
NM_000067	hsa	760	CA2	carbonic anhydrase II	miR-107	1	1	2	GO:0001822(kidney development),GO:0002009(morphogenesis of an epithelium),GO:0004089(carbonate dehydratase activity),GO:0005515(protein binding),GO:0005615(extracellular space),GO:0005634(nucleus),GO:0005737(cytoplasm),GO:0005902(microvillus),GO:0006730(one-carbon metabolic process),GO:0006950(response to stress),GO:0008270(zinc ion binding),GO:0009268(response to pH),GO:0010033(response to organ…	ko00910(Nitrogen metabolism)
NM_000068	hsa	773	CACNA1A	calcium channel, voltage-dependent, P/Q type, alpha 1A subunit	miR-4455	1	1	2	GO:0000096(sulfur amino acid metabolic process),GO:0005244(voltage-gated ion channel activity),GO:0005509(calcium ion binding),GO:0005516(calmodulin binding),GO:0005634(nucleus),GO:0005737(cytoplasm),GO:0005886(plasma membrane),GO:0005891(voltage-gated calcium channel complex),GO:0006006(glucose metabolic process),GO:0006811(ion transport),GO:0006816(calcium ion transport),GO:0007204(elevation of…	ko04010(MAPK signaling pathway),ko04020(Calcium signaling pathway),ko04730(Long-term depression),ko04742(Taste transduction),ko04930(Type II diabetes mellitus)
NM_000068	hsa	773	CACNA1A	calcium channel, voltage-dependent, P/Q type, alpha 1A subunit	miR-4734	1	1	2	GO:0000096(sulfur amino acid metabolic process),GO:0005244(voltage-gated ion channel activity),GO:0005509(calcium ion binding),GO:0005516(calmodulin binding),GO:0005634(nucleus),GO:0005737(cytoplasm),GO:0005886(plasma membrane),GO:0005891(voltage-gated calcium channel complex),GO:0006006(glucose metabolic process),GO:0006811(ion transport),GO:0006816(calcium ion transport),GO:0007204(elevation of…	ko04010(MAPK signaling pathway),ko04020(Calcium signaling pathway),ko04730(Long-term depression),ko04742(Taste transduction),ko04930(Type II diabetes mellitus)
NM_000068	hsa	773	CACNA1A	calcium channel, voltage-dependent, P/Q type, alpha 1A subunit	miR-720	1	1	2	GO:0000096(sulfur amino acid metabolic process),GO:0005244(voltage-gated ion channel activity),GO:0005509(calcium ion binding),GO:0005516(calmodulin binding),GO:0005634(nucleus),GO:0005737(cytoplasm),GO:0005886(plasma membrane),GO:0005891(voltage-gated calcium channel complex),GO:0006006(glucose metabolic process),GO:0006811(ion transport),GO:0006816(calcium ion transport),GO:0007204(elevation of…	ko04010(MAPK signaling pathway),ko04020(Calcium signaling pathway),ko04730(Long-term depression),ko04742(Taste transduction),ko04930(Type II diabetes mellitus)
NM_000069	hsa	779	CACNA1S	calcium channel, voltage-dependent, L type, alpha 1S subunit	miR-3665	1	1	2	GO:0001501(skeletal system development),GO:0002074(extraocular skeletal muscle development),GO:0005244(voltage-gated ion channel activity),GO:0005509(calcium ion binding),GO:0005737(cytoplasm),GO:0005886(plasma membrane),GO:0005891(voltage-gated calcium channel complex),GO:0006811(ion transport),GO:0006816(calcium ion transport),GO:0006941(striated muscle contraction),GO:0007029(endoplasmic retic…	ko04010(MAPK signaling pathway),ko04020(Calcium signaling pathway),ko04260(Cardiac muscle contraction),ko04270(Vascular smooth muscle contraction),ko04912(GnRH signaling pathway),ko05010(Alzheimer's disease),ko05410(Hypertrophic cardiomyopathy (HCM)),ko05412(Arrhythmogenic right ventricular cardiomyopathy (ARVC)),ko05414(Dilated cardiomyopathy)
NM_000070	hsa	825	CAPN3	calpain 3, (p94)	miR-4534	1	1	2	GO:0004198(calcium-dependent cysteine-type endopeptidase activity),GO:0004871(signal transducer activity),GO:0005509(calcium ion binding),GO:0005515(protein binding),GO:0005622(intracellular),GO:0005634(nucleus),GO:0005737(cytoplasm),GO:0006508(proteolysis),GO:0007517(muscle organ development),GO:0008233(peptidase activity),GO:0042493(response to drug),GO:0045214(sarcomere organization),GO:005159…
NM_000071	hsa	875	CBS	cystathionine-beta-synthase	miR-494	1	1	2	GO:0004122(cystathionine beta-synthase activity),GO:0005634(nucleus),GO:0005730(nucleolus),GO:0005737(cytoplasm),GO:0005829(cytosol),GO:0006535(cysteine biosynthetic process from serine),GO:0006565(L-serine catabolic process),GO:0008152(metabolic process),GO:0008652(cellular amino acid biosynthetic process),GO:0016829(lyase activity),GO:0019343(cysteine biosynthetic process via cystathionine),GO:…	ko00260(Glycine,ko serine and threonine metabolism),ko00270(Cysteine and methionine metabolism),ko00450(Selenoamino acid metabolism),ko01100(Metabolic pathways)
NM_000074	hsa	959	CD40LG	CD40 ligand	miR-3935	1	1	2	GO:0005125(cytokine activity),GO:0005164(tumor necrosis factor receptor binding),GO:0005174(CD40 receptor binding),GO:0005576(extracellular region),GO:0005615(extracellular space),GO:0005625(soluble fraction),GO:0005886(plasma membrane),GO:0005887(integral to plasma membrane),GO:0006916(anti-apoptosis),GO:0006954(inflammatory response),GO:0006955(immune response),GO:0007159(leukocyte adhesion),GO…	ko04060(Cytokine-cytokine receptor interaction),ko04514(Cell adhesion molecules (CAMs)),ko04660(T cell receptor signaling pathway),ko04672(Intestinal immune network for IgA production),ko05310(Asthma),ko05320(Autoimmune thyroid disease),ko05322(Systemic lupus erythematosus),ko05330(Allograft rejection),ko05340(Primary immunodeficiency),ko05416(Viral myocarditis)
NM_000074	hsa	959	CD40LG	CD40 ligand	miR-4277	1	1	2	GO:0005125(cytokine activity),GO:0005164(tumor necrosis factor receptor binding),GO:0005174(CD40 receptor binding),GO:0005576(extracellular region),GO:0005615(extracellular space),GO:0005625(soluble fraction),GO:0005886(plasma membrane),GO:0005887(integral to plasma membrane),GO:0006916(anti-apoptosis),GO:0006954(inflammatory response),GO:0006955(immune response),GO:0007159(leukocyte adhesion),GO…	ko04060(Cytokine-cytokine receptor interaction),ko04514(Cell adhesion molecules (CAMs)),ko04660(T cell receptor signaling pathway),ko04672(Intestinal immune network for IgA production),ko05310(Asthma),ko05320(Autoimmune thyroid disease),ko05322(Systemic lupus erythematosus),ko05330(Allograft rejection),ko05340(Primary immunodeficiency),ko05416(Viral myocarditis)
NM_000074	hsa	959	CD40LG	CD40 ligand	miR-4534	1	1	2	GO:0005125(cytokine activity),GO:0005164(tumor necrosis factor receptor binding),GO:0005174(CD40 receptor binding),GO:0005576(extracellular region),GO:0005615(extracellular space),GO:0005625(soluble fraction),GO:0005886(plasma membrane),GO:0005887(integral to plasma membrane),GO:0006916(anti-apoptosis),GO:0006954(inflammatory response),GO:0006955(immune response),GO:0007159(leukocyte adhesion),GO…	ko04060(Cytokine-cytokine receptor interaction),ko04514(Cell adhesion molecules (CAMs)),ko04660(T cell receptor signaling pathway),ko04672(Intestinal immune network for IgA production),ko05310(Asthma),ko05320(Autoimmune thyroid disease),ko05322(Systemic lupus erythematosus),ko05330(Allograft rejection),ko05340(Primary immunodeficiency),ko05416(Viral myocarditis)
NM_000075	hsa	1019	CDK4	cyclin-dependent kinase 4	miR-4534	1	1	2	GO:0000082(G1/S transition of mitotic cell cycle),GO:0000166(nucleotide binding),GO:0000307(cyclin-dependent protein kinase holoenzyme complex),GO:0004693(cyclin-dependent protein kinase activity),GO:0005515(protein binding),GO:0005524(ATP binding),GO:0005634(nucleus),GO:0005654(nucleoplasm),GO:0005667(transcription factor complex),GO:0005829(cytosol),GO:0006468(protein amino acid phosphorylation…	ko04110(Cell cycle),ko04115(p53 signaling pathway),ko04530(Tight junction),ko04660(T cell receptor signaling pathway),ko05200(Pathways in cancer),ko05212(Pancreatic cancer),ko05214(Glioma),ko05218(Melanoma),ko05219(Bladder cancer),ko05220(Chronic myeloid leukemia),ko05222(Small cell lung cancer),ko05223(Non-small cell lung cancer)
NM_000076	hsa	1028	CDKN1C	cyclin-dependent kinase inhibitor 1C (p57, Kip2)	miR-103a	1	1	2	GO:0000079(regulation of cyclin-dependent protein kinase activity),GO:0000080(G1 phase of mitotic cell cycle),GO:0000122(negative regulation of transcription from RNA polymerase II promoter),GO:0004860(protein kinase inhibitor activity),GO:0004861(cyclin-dependent protein kinase inhibitor activity),GO:0005515(protein binding),GO:0005634(nucleus),GO:0005730(nucleolus),GO:0005737(cytoplasm),GO:0007…	ko04110(Cell cycle)
NM_000076	hsa	1028	CDKN1C	cyclin-dependent kinase inhibitor 1C (p57, Kip2)	miR-107	1	1	2	GO:0000079(regulation of cyclin-dependent protein kinase activity),GO:0000080(G1 phase of mitotic cell cycle),GO:0000122(negative regulation of transcription from RNA polymerase II promoter),GO:0004860(protein kinase inhibitor activity),GO:0004861(cyclin-dependent protein kinase inhibitor activity),GO:0005515(protein binding),GO:0005634(nucleus),GO:0005730(nucleolus),GO:0005737(cytoplasm),GO:0007…	ko04110(Cell cycle)
NM_000076	hsa	1028	CDKN1C	cyclin-dependent kinase inhibitor 1C (p57, Kip2)	miR-4534	1	1	2	GO:0000079(regulation of cyclin-dependent protein kinase activity),GO:0000080(G1 phase of mitotic cell cycle),GO:0000122(negative regulation of transcription from RNA polymerase II promoter),GO:0004860(protein kinase inhibitor activity),GO:0004861(cyclin-dependent protein kinase inhibitor activity),GO:0005515(protein binding),GO:0005634(nucleus),GO:0005730(nucleolus),GO:0005737(cytoplasm),GO:0007…	ko04110(Cell cycle)
NM_000080	hsa	1145	CHRNE	cholinergic receptor, nicotinic, epsilon	miR-1260b	1	1	2	GO:0004872(receptor activity),GO:0004889(nicotinic acetylcholine-activated cation-selective channel activity),GO:0005216(ion channel activity),GO:0005230(extracellular ligand-gated ion channel activity),GO:0005886(plasma membrane),GO:0005892(nicotinic acetylcholine-gated receptor-channel complex),GO:0006811(ion transport),GO:0006936(muscle contraction),GO:0007165(signal transduction),GO:0007271(s…
NM_000080	hsa	1145	CHRNE	cholinergic receptor, nicotinic, epsilon	miR-4324	1	1	2	GO:0004872(receptor activity),GO:0004889(nicotinic acetylcholine-activated cation-selective channel activity),GO:0005216(ion channel activity),GO:0005230(extracellular ligand-gated ion channel activity),GO:0005886(plasma membrane),GO:0005892(nicotinic acetylcholine-gated receptor-channel complex),GO:0006811(ion transport),GO:0006936(muscle contraction),GO:0007165(signal transduction),GO:0007271(s…
NM_000080	hsa	1145	CHRNE	cholinergic receptor, nicotinic, epsilon	miR-4530	1	1	2	GO:0004872(receptor activity),GO:0004889(nicotinic acetylcholine-activated cation-selective channel activity),GO:0005216(ion channel activity),GO:0005230(extracellular ligand-gated ion channel activity),GO:0005886(plasma membrane),GO:0005892(nicotinic acetylcholine-gated receptor-channel complex),GO:0006811(ion transport),GO:0006936(muscle contraction),GO:0007165(signal transduction),GO:0007271(s…
NM_000081	hsa	1130	LYST	lysosomal trafficking regulator	miR-30b	1	1	2	GO:0005515(protein binding),GO:0005737(cytoplasm),GO:0015031(protein transport),GO:0015630(microtubule cytoskeleton),GO:0030595(leukocyte chemotaxis),GO:0032438(melanosome organization),GO:0032510(endosome to lysosome transport via multivesicular body sorting pathway),GO:0033364(mast cell secretory granule organization),GO:0042267(natural killer cell mediated cytotoxicity),GO:0042742(defense resp…
NM_000081	hsa	1130	LYST	lysosomal trafficking regulator	miR-3591-3p	1	1	2	GO:0005515(protein binding),GO:0005737(cytoplasm),GO:0015031(protein transport),GO:0015630(microtubule cytoskeleton),GO:0030595(leukocyte chemotaxis),GO:0032438(melanosome organization),GO:0032510(endosome to lysosome transport via multivesicular body sorting pathway),GO:0033364(mast cell secretory granule organization),GO:0042267(natural killer cell mediated cytotoxicity),GO:0042742(defense resp…
NM_000084	hsa	1184	CLCN5	chloride channel 5	miR-103a	1	1	2	GO:0000166(nucleotide binding),GO:0005216(ion channel activity),GO:0005247(voltage-gated chloride channel activity),GO:0005524(ATP binding),GO:0005768(endosome),GO:0005794(Golgi apparatus),GO:0005886(plasma membrane),GO:0005887(integral to plasma membrane),GO:0006811(ion transport),GO:0006821(chloride transport),GO:0006897(endocytosis),GO:0007588(excretion),GO:0015297(antiporter activity),GO:0031…
NM_000084	hsa	1184	CLCN5	chloride channel 5	miR-107	1	1	2	GO:0000166(nucleotide binding),GO:0005216(ion channel activity),GO:0005247(voltage-gated chloride channel activity),GO:0005524(ATP binding),GO:0005768(endosome),GO:0005794(Golgi apparatus),GO:0005886(plasma membrane),GO:0005887(integral to plasma membrane),GO:0006811(ion transport),GO:0006821(chloride transport),GO:0006897(endocytosis),GO:0007588(excretion),GO:0015297(antiporter activity),GO:0031…
NM_000084	hsa	1184	CLCN5	chloride channel 5	miR-320a	1	1	2	GO:0000166(nucleotide binding),GO:0005216(ion channel activity),GO:0005247(voltage-gated chloride channel activity),GO:0005524(ATP binding),GO:0005768(endosome),GO:0005794(Golgi apparatus),GO:0005886(plasma membrane),GO:0005887(integral to plasma membrane),GO:0006811(ion transport),GO:0006821(chloride transport),GO:0006897(endocytosis),GO:0007588(excretion),GO:0015297(antiporter activity),GO:0031…
NM_000084	hsa	1184	CLCN5	chloride channel 5	miR-320b	1	1	2	GO:0000166(nucleotide binding),GO:0005216(ion channel activity),GO:0005247(voltage-gated chloride channel activity),GO:0005524(ATP binding),GO:0005768(endosome),GO:0005794(Golgi apparatus),GO:0005886(plasma membrane),GO:0005887(integral to plasma membrane),GO:0006811(ion transport),GO:0006821(chloride transport),GO:0006897(endocytosis),GO:0007588(excretion),GO:0015297(antiporter activity),GO:0031…
NM_000084	hsa	1184	CLCN5	chloride channel 5	miR-320c	1	1	2	GO:0000166(nucleotide binding),GO:0005216(ion channel activity),GO:0005247(voltage-gated chloride channel activity),GO:0005524(ATP binding),GO:0005768(endosome),GO:0005794(Golgi apparatus),GO:0005886(plasma membrane),GO:0005887(integral to plasma membrane),GO:0006811(ion transport),GO:0006821(chloride transport),GO:0006897(endocytosis),GO:0007588(excretion),GO:0015297(antiporter activity),GO:0031…
NM_000084	hsa	1184	CLCN5	chloride channel 5	miR-4324	1	1	2	GO:0000166(nucleotide binding),GO:0005216(ion channel activity),GO:0005247(voltage-gated chloride channel activity),GO:0005524(ATP binding),GO:0005768(endosome),GO:0005794(Golgi apparatus),GO:0005886(plasma membrane),GO:0005887(integral to plasma membrane),GO:0006811(ion transport),GO:0006821(chloride transport),GO:0006897(endocytosis),GO:0007588(excretion),GO:0015297(antiporter activity),GO:0031…
NM_000084	hsa	1184	CLCN5	chloride channel 5	miR-4687-3p	1	1	2	GO:0000166(nucleotide binding),GO:0005216(ion channel activity),GO:0005247(voltage-gated chloride channel activity),GO:0005524(ATP binding),GO:0005768(endosome),GO:0005794(Golgi apparatus),GO:0005886(plasma membrane),GO:0005887(integral to plasma membrane),GO:0006811(ion transport),GO:0006821(chloride transport),GO:0006897(endocytosis),GO:0007588(excretion),GO:0015297(antiporter activity),GO:0031…
NM_000084	hsa	1184	CLCN5	chloride channel 5	miR-5096	1	1	2	GO:0000166(nucleotide binding),GO:0005216(ion channel activity),GO:0005247(voltage-gated chloride channel activity),GO:0005524(ATP binding),GO:0005768(endosome),GO:0005794(Golgi apparatus),GO:0005886(plasma membrane),GO:0005887(integral to plasma membrane),GO:0006811(ion transport),GO:0006821(chloride transport),GO:0006897(endocytosis),GO:0007588(excretion),GO:0015297(antiporter activity),GO:0031…
NM_000085	hsa	1188	CLCNKB	chloride channel Kb	miR-1260b	1	1	2	GO:0005244(voltage-gated ion channel activity),GO:0005247(voltage-gated chloride channel activity),GO:0005887(integral to plasma membrane),GO:0006811(ion transport),GO:0006821(chloride transport),GO:0007588(excretion),GO:0016020(membrane),GO:0031404(chloride ion binding),GO:0034707(chloride channel complex),GO:0055085(transmembrane transport)
NM_000087	hsa	1259	CNGA1	cyclic nucleotide gated channel alpha 1	miR-4455	1	1	2	GO:0000166(nucleotide binding),GO:0001750(photoreceptor outer segment),GO:0005216(ion channel activity),GO:0005624(membrane fraction),GO:0005737(cytoplasm),GO:0005887(integral to plasma membrane),GO:0006811(ion transport),GO:0007283(spermatogenesis),GO:0007601(visual perception),GO:0016020(membrane),GO:0017071(intracellular cyclic nucleotide activated cation channel complex),GO:0030553(cGMP bindi…
NM_000091	hsa	1285	COL4A3	collagen, type IV, alpha 3 (Goodpasture antigen)	miR-103a	1	1	2	GO:0005178(integrin binding),GO:0005201(extracellular matrix structural constituent),GO:0005515(protein binding),GO:0005576(extracellular region),GO:0005581(collagen),GO:0005587(collagen type IV),GO:0006917(induction of apoptosis),GO:0006919(activation of caspase activity),GO:0007155(cell adhesion),GO:0007166(cell surface receptor linked signal transduction),GO:0007605(sensory perception of sound…
NM_000091	hsa	1285	COL4A3	collagen, type IV, alpha 3 (Goodpasture antigen)	miR-107	1	1	2	GO:0005178(integrin binding),GO:0005201(extracellular matrix structural constituent),GO:0005515(protein binding),GO:0005576(extracellular region),GO:0005581(collagen),GO:0005587(collagen type IV),GO:0006917(induction of apoptosis),GO:0006919(activation of caspase activity),GO:0007155(cell adhesion),GO:0007166(cell surface receptor linked signal transduction),GO:0007605(sensory perception of sound…
NM_000091	hsa	1285	COL4A3	collagen, type IV, alpha 3 (Goodpasture antigen)	miR-1246	1	1	2	GO:0005178(integrin binding),GO:0005201(extracellular matrix structural constituent),GO:0005515(protein binding),GO:0005576(extracellular region),GO:0005581(collagen),GO:0005587(collagen type IV),GO:0006917(induction of apoptosis),GO:0006919(activation of caspase activity),GO:0007155(cell adhesion),GO:0007166(cell surface receptor linked signal transduction),GO:0007605(sensory perception of sound…
NM_000091	hsa	1285	COL4A3	collagen, type IV, alpha 3 (Goodpasture antigen)	miR-3935	1	1	2	GO:0005178(integrin binding),GO:0005201(extracellular matrix structural constituent),GO:0005515(protein binding),GO:0005576(extracellular region),GO:0005581(collagen),GO:0005587(collagen type IV),GO:0006917(induction of apoptosis),GO:0006919(activation of caspase activity),GO:0007155(cell adhesion),GO:0007166(cell surface receptor linked signal transduction),GO:0007605(sensory perception of sound…
NM_000091	hsa	1285	COL4A3	collagen, type IV, alpha 3 (Goodpasture antigen)	miR-4277	1	1	2	GO:0005178(integrin binding),GO:0005201(extracellular matrix structural constituent),GO:0005515(protein binding),GO:0005576(extracellular region),GO:0005581(collagen),GO:0005587(collagen type IV),GO:0006917(induction of apoptosis),GO:0006919(activation of caspase activity),GO:0007155(cell adhesion),GO:0007166(cell surface receptor linked signal transduction),GO:0007605(sensory perception of sound…
NM_000091	hsa	1285	COL4A3	collagen, type IV, alpha 3 (Goodpasture antigen)	miR-4443	1	1	2	GO:0005178(integrin binding),GO:0005201(extracellular matrix structural constituent),GO:0005515(protein binding),GO:0005576(extracellular region),GO:0005581(collagen),GO:0005587(collagen type IV),GO:0006917(induction of apoptosis),GO:0006919(activation of caspase activity),GO:0007155(cell adhesion),GO:0007166(cell surface receptor linked signal transduction),GO:0007605(sensory perception of sound…
NM_000092	hsa	1286	COL4A4	collagen, type IV, alpha 4	miR-103a	1	1	2	GO:0005201(extracellular matrix structural constituent),GO:0005515(protein binding),GO:0005576(extracellular region),GO:0005581(collagen),GO:0005587(collagen type IV),GO:0042062(long-term strengthening of neuromuscular junction)	ko04510(Focal adhesion),ko04512(ECM-receptor interaction),ko05200(Pathways in cancer),ko05222(Small cell lung cancer)
NM_000092	hsa	1286	COL4A4	collagen, type IV, alpha 4	miR-107	1	1	2	GO:0005201(extracellular matrix structural constituent),GO:0005515(protein binding),GO:0005576(extracellular region),GO:0005581(collagen),GO:0005587(collagen type IV),GO:0042062(long-term strengthening of neuromuscular junction)	ko04510(Focal adhesion),ko04512(ECM-receptor interaction),ko05200(Pathways in cancer),ko05222(Small cell lung cancer)
NM_000092	hsa	1286	COL4A4	collagen, type IV, alpha 4	miR-1260b	1	1	2	GO:0005201(extracellular matrix structural constituent),GO:0005515(protein binding),GO:0005576(extracellular region),GO:0005581(collagen),GO:0005587(collagen type IV),GO:0042062(long-term strengthening of neuromuscular junction)	ko04510(Focal adhesion),ko04512(ECM-receptor interaction),ko05200(Pathways in cancer),ko05222(Small cell lung cancer)
NM_000092	hsa	1286	COL4A4	collagen, type IV, alpha 4	miR-23c	1	1	2	GO:0005201(extracellular matrix structural constituent),GO:0005515(protein binding),GO:0005576(extracellular region),GO:0005581(collagen),GO:0005587(collagen type IV),GO:0042062(long-term strengthening of neuromuscular junction)	ko04510(Focal adhesion),ko04512(ECM-receptor interaction),ko05200(Pathways in cancer),ko05222(Small cell lung cancer)
NM_000092	hsa	1286	COL4A4	collagen, type IV, alpha 4	miR-4277	1	1	2	GO:0005201(extracellular matrix structural constituent),GO:0005515(protein binding),GO:0005576(extracellular region),GO:0005581(collagen),GO:0005587(collagen type IV),GO:0042062(long-term strengthening of neuromuscular junction)	ko04510(Focal adhesion),ko04512(ECM-receptor interaction),ko05200(Pathways in cancer),ko05222(Small cell lung cancer)
NM_000092	hsa	1286	COL4A4	collagen, type IV, alpha 4	miR-4455	1	1	2	GO:0005201(extracellular matrix structural constituent),GO:0005515(protein binding),GO:0005576(extracellular region),GO:0005581(collagen),GO:0005587(collagen type IV),GO:0042062(long-term strengthening of neuromuscular junction)	ko04510(Focal adhesion),ko04512(ECM-receptor interaction),ko05200(Pathways in cancer),ko05222(Small cell lung cancer)
NM_000093	hsa	1289	COL5A1	collagen, type V, alpha 1	miR-103a	1	1	2	GO:0001568(blood vessel development),GO:0003007(heart morphogenesis),GO:0005178(integrin binding),GO:0005201(extracellular matrix structural constituent),GO:0005515(protein binding),GO:0005576(extracellular region),GO:0005581(collagen),GO:0005588(collagen type V),GO:0005604(basement membrane),GO:0007155(cell adhesion),GO:0008201(heparin binding),GO:0030199(collagen fibril organization),GO:0032964…	ko04510(Focal adhesion),ko04512(ECM-receptor interaction)
NM_000093	hsa	1289	COL5A1	collagen, type V, alpha 1	miR-107	1	1	2	GO:0001568(blood vessel development),GO:0003007(heart morphogenesis),GO:0005178(integrin binding),GO:0005201(extracellular matrix structural constituent),GO:0005515(protein binding),GO:0005576(extracellular region),GO:0005581(collagen),GO:0005588(collagen type V),GO:0005604(basement membrane),GO:0007155(cell adhesion),GO:0008201(heparin binding),GO:0030199(collagen fibril organization),GO:0032964…	ko04510(Focal adhesion),ko04512(ECM-receptor interaction)
NM_000093	hsa	1289	COL5A1	collagen, type V, alpha 1	miR-4443	1	1	2	GO:0001568(blood vessel development),GO:0003007(heart morphogenesis),GO:0005178(integrin binding),GO:0005201(extracellular matrix structural constituent),GO:0005515(protein binding),GO:0005576(extracellular region),GO:0005581(collagen),GO:0005588(collagen type V),GO:0005604(basement membrane),GO:0007155(cell adhesion),GO:0008201(heparin binding),GO:0030199(collagen fibril organization),GO:0032964…	ko04510(Focal adhesion),ko04512(ECM-receptor interaction)
NM_000093	hsa	1289	COL5A1	collagen, type V, alpha 1	miR-4455	1	1	2	GO:0001568(blood vessel development),GO:0003007(heart morphogenesis),GO:0005178(integrin binding),GO:0005201(extracellular matrix structural constituent),GO:0005515(protein binding),GO:0005576(extracellular region),GO:0005581(collagen),GO:0005588(collagen type V),GO:0005604(basement membrane),GO:0007155(cell adhesion),GO:0008201(heparin binding),GO:0030199(collagen fibril organization),GO:0032964…	ko04510(Focal adhesion),ko04512(ECM-receptor interaction)
NM_000093	hsa	1289	COL5A1	collagen, type V, alpha 1	miR-4734	1	1	2	GO:0001568(blood vessel development),GO:0003007(heart morphogenesis),GO:0005178(integrin binding),GO:0005201(extracellular matrix structural constituent),GO:0005515(protein binding),GO:0005576(extracellular region),GO:0005581(collagen),GO:0005588(collagen type V),GO:0005604(basement membrane),GO:0007155(cell adhesion),GO:0008201(heparin binding),GO:0030199(collagen fibril organization),GO:0032964…	ko04510(Focal adhesion),ko04512(ECM-receptor interaction)
NM_000096	hsa	1356	CP	ceruloplasmin (ferroxidase)	miR-494	1	1	2	GO:0004322(ferroxidase activity),GO:0005507(copper ion binding),GO:0005576(extracellular region),GO:0005615(extracellular space),GO:0006811(ion transport),GO:0006825(copper ion transport),GO:0006879(cellular iron ion homeostasis),GO:0016491(oxidoreductase activity),GO:0046872(metal ion binding),GO:0055114(oxidation reduction)	ko00860(Porphyrin and chlorophyll metabolism)
NM_000097	hsa	1371	CPOX	coproporphyrinogen oxidase	miR-181d	1	1	2	GO:0004109(coproporphyrinogen oxidase activity),GO:0005737(cytoplasm),GO:0005739(mitochondrion),GO:0005758(mitochondrial intermembrane space),GO:0006783(heme biosynthetic process),GO:0016491(oxidoreductase activity),GO:0042493(response to drug),GO:0042803(protein homodimerization activity),GO:0046685(response to arsenic),GO:0046689(response to mercury ion),GO:0055114(oxidation reduction)	ko00860(Porphyrin and chlorophyll metabolism),ko01100(Metabolic pathways)
NM_000097	hsa	1371	CPOX	coproporphyrinogen oxidase	miR-23c	1	1	2	GO:0004109(coproporphyrinogen oxidase activity),GO:0005737(cytoplasm),GO:0005739(mitochondrion),GO:0005758(mitochondrial intermembrane space),GO:0006783(heme biosynthetic process),GO:0016491(oxidoreductase activity),GO:0042493(response to drug),GO:0042803(protein homodimerization activity),GO:0046685(response to arsenic),GO:0046689(response to mercury ion),GO:0055114(oxidation reduction)	ko00860(Porphyrin and chlorophyll metabolism),ko01100(Metabolic pathways)
NM_000098	hsa	1376	CPT2	carnitine palmitoyltransferase 2	miR-5096	1	1	2	GO:0004095(carnitine O-palmitoyltransferase activity),GO:0005739(mitochondrion),GO:0005743(mitochondrial inner membrane),GO:0006629(lipid metabolic process),GO:0006631(fatty acid metabolic process),GO:0006635(fatty acid beta-oxidation),GO:0006810(transport),GO:0006853(carnitine shuttle),GO:0008415(acyltransferase activity),GO:0016020(membrane),GO:0016740(transferase activity),GO:0046320(regulatio…	ko00071(Fatty acid metabolism),ko03320(PPAR signaling pathway)
NM_000098	hsa	1376	CPT2	carnitine palmitoyltransferase 2	miR-720	1	1	2	GO:0004095(carnitine O-palmitoyltransferase activity),GO:0005739(mitochondrion),GO:0005743(mitochondrial inner membrane),GO:0006629(lipid metabolic process),GO:0006631(fatty acid metabolic process),GO:0006635(fatty acid beta-oxidation),GO:0006810(transport),GO:0006853(carnitine shuttle),GO:0008415(acyltransferase activity),GO:0016020(membrane),GO:0016740(transferase activity),GO:0046320(regulatio…	ko00071(Fatty acid metabolism),ko03320(PPAR signaling pathway)
NM_000101	hsa	1535	CYBA	cytochrome b-245, alpha polypeptide	miR-3665	1	1	2	GO:0005515(protein binding),GO:0005737(cytoplasm),GO:0005739(mitochondrion),GO:0005794(Golgi apparatus),GO:0006810(transport),GO:0006954(inflammatory response),GO:0008217(regulation of blood pressure),GO:0009055(electron carrier activity),GO:0014895(smooth muscle hypertrophy),GO:0016020(membrane),GO:0016175(superoxide-generating NADPH oxidase activity),GO:0016491(oxidoreductase activity),GO:00170…	ko04670(Leukocyte transendothelial migration)
NM_000103	hsa	1588	CYP19A1	cytochrome P450, family 19, subfamily A, polypeptide 1	miR-181d	1	1	2	GO:0005624(membrane fraction),GO:0005783(endoplasmic reticulum),GO:0006694(steroid biosynthetic process),GO:0009055(electron carrier activity),GO:0016020(membrane),GO:0019825(oxygen binding),GO:0019898(extrinsic to membrane),GO:0020037(heme binding),GO:0046872(metal ion binding),GO:0055114(oxidation reduction),GO:0070330(aromatase activity)	ko00150(Androgen and estrogen metabolism),ko01100(Metabolic pathways)
NM_000103	hsa	1588	CYP19A1	cytochrome P450, family 19, subfamily A, polypeptide 1	miR-23c	1	1	2	GO:0005624(membrane fraction),GO:0005783(endoplasmic reticulum),GO:0006694(steroid biosynthetic process),GO:0009055(electron carrier activity),GO:0016020(membrane),GO:0019825(oxygen binding),GO:0019898(extrinsic to membrane),GO:0020037(heme binding),GO:0046872(metal ion binding),GO:0055114(oxidation reduction),GO:0070330(aromatase activity)	ko00150(Androgen and estrogen metabolism),ko01100(Metabolic pathways)
NM_000103	hsa	1588	CYP19A1	cytochrome P450, family 19, subfamily A, polypeptide 1	miR-3665	1	1	2	GO:0005624(membrane fraction),GO:0005783(endoplasmic reticulum),GO:0006694(steroid biosynthetic process),GO:0009055(electron carrier activity),GO:0016020(membrane),GO:0019825(oxygen binding),GO:0019898(extrinsic to membrane),GO:0020037(heme binding),GO:0046872(metal ion binding),GO:0055114(oxidation reduction),GO:0070330(aromatase activity)	ko00150(Androgen and estrogen metabolism),ko01100(Metabolic pathways)
NM_000103	hsa	1588	CYP19A1	cytochrome P450, family 19, subfamily A, polypeptide 1	miR-4277	1	1	2	GO:0005624(membrane fraction),GO:0005783(endoplasmic reticulum),GO:0006694(steroid biosynthetic process),GO:0009055(electron carrier activity),GO:0016020(membrane),GO:0019825(oxygen binding),GO:0019898(extrinsic to membrane),GO:0020037(heme binding),GO:0046872(metal ion binding),GO:0055114(oxidation reduction),GO:0070330(aromatase activity)	ko00150(Androgen and estrogen metabolism),ko01100(Metabolic pathways)
NM_000104	hsa	1545	CYP1B1	cytochrome P450, family 1, subfamily B, polypeptide 1	miR-1260b	1	1	2	GO:0004497(monooxygenase activity),GO:0005515(protein binding),GO:0005783(endoplasmic reticulum),GO:0005789(endoplasmic reticulum membrane),GO:0005792(microsome),GO:0006725(cellular aromatic compound metabolic process),GO:0007601(visual perception),GO:0008210(estrogen metabolic process),GO:0009055(electron carrier activity),GO:0009404(toxin metabolic process),GO:0010033(response to organic substa…	ko00380(Tryptophan metabolism),ko00980(Metabolism of xenobiotics by cytochrome P450)
NM_000104	hsa	1545	CYP1B1	cytochrome P450, family 1, subfamily B, polypeptide 1	miR-4324	1	1	2	GO:0004497(monooxygenase activity),GO:0005515(protein binding),GO:0005783(endoplasmic reticulum),GO:0005789(endoplasmic reticulum membrane),GO:0005792(microsome),GO:0006725(cellular aromatic compound metabolic process),GO:0007601(visual perception),GO:0008210(estrogen metabolic process),GO:0009055(electron carrier activity),GO:0009404(toxin metabolic process),GO:0010033(response to organic substa…	ko00380(Tryptophan metabolism),ko00980(Metabolism of xenobiotics by cytochrome P450)
NM_000104	hsa	1545	CYP1B1	cytochrome P450, family 1, subfamily B, polypeptide 1	miR-4455	1	1	2	GO:0004497(monooxygenase activity),GO:0005515(protein binding),GO:0005783(endoplasmic reticulum),GO:0005789(endoplasmic reticulum membrane),GO:0005792(microsome),GO:0006725(cellular aromatic compound metabolic process),GO:0007601(visual perception),GO:0008210(estrogen metabolic process),GO:0009055(electron carrier activity),GO:0009404(toxin metabolic process),GO:0010033(response to organic substa…	ko00380(Tryptophan metabolism),ko00980(Metabolism of xenobiotics by cytochrome P450)
NM_000107	hsa	1643	DDB2	damage-specific DNA binding protein 2, 48kDa	miR-4443	1	1	2	GO:0000209(protein polyubiquitination),GO:0000718(nucleotide-excision repair, DNA damage removal),GO:0003684(damaged DNA binding),GO:0004842(ubiquitin-protein ligase activity),GO:0005515(protein binding),GO:0005634(nucleus),GO:0005654(nucleoplasm),GO:0006290(pyrimidine dimer repair),GO:0006974(response to DNA damage stimulus),GO:0009411(response to UV),GO:0019941(modification-dependent protein ca…	ko03420(Nucleotide excision repair),ko04115(p53 signaling pathway),ko04120(Ubiquitin mediated proteolysis)
NM_000108	hsa	1738	DLD	dihydrolipoamide dehydrogenase	miR-103a	1	1	2	GO:0004148(dihydrolipoyl dehydrogenase activity),GO:0005737(cytoplasm),GO:0005739(mitochondrion),GO:0005759(mitochondrial matrix),GO:0006086(acetyl-CoA biosynthetic process from pyruvate),GO:0006103(2-oxoglutarate metabolic process),GO:0006120(mitochondrial electron transport, NADH to ubiquinone),GO:0006508(proteolysis),GO:0007369(gastrulation),GO:0007568(aging),GO:0009055(electron carrier activi…	ko00010(Glycolysis / Gluconeogenesis),ko00020(Citrate cycle (TCA cycle)),ko00260(Glycine,ko serine and threonine metabolism),ko00280(Valine,ko leucine and isoleucine degradation),ko00620(Pyruvate metabolism),ko01100(Metabolic pathways)
NM_000108	hsa	1738	DLD	dihydrolipoamide dehydrogenase	miR-107	1	1	2	GO:0004148(dihydrolipoyl dehydrogenase activity),GO:0005737(cytoplasm),GO:0005739(mitochondrion),GO:0005759(mitochondrial matrix),GO:0006086(acetyl-CoA biosynthetic process from pyruvate),GO:0006103(2-oxoglutarate metabolic process),GO:0006120(mitochondrial electron transport, NADH to ubiquinone),GO:0006508(proteolysis),GO:0007369(gastrulation),GO:0007568(aging),GO:0009055(electron carrier activi…	ko00010(Glycolysis / Gluconeogenesis),ko00020(Citrate cycle (TCA cycle)),ko00260(Glycine,ko serine and threonine metabolism),ko00280(Valine,ko leucine and isoleucine degradation),ko00620(Pyruvate metabolism),ko01100(Metabolic pathways)
NM_000108	hsa	1738	DLD	dihydrolipoamide dehydrogenase	miR-1246	1	1	2	GO:0004148(dihydrolipoyl dehydrogenase activity),GO:0005737(cytoplasm),GO:0005739(mitochondrion),GO:0005759(mitochondrial matrix),GO:0006086(acetyl-CoA biosynthetic process from pyruvate),GO:0006103(2-oxoglutarate metabolic process),GO:0006120(mitochondrial electron transport, NADH to ubiquinone),GO:0006508(proteolysis),GO:0007369(gastrulation),GO:0007568(aging),GO:0009055(electron carrier activi…	ko00010(Glycolysis / Gluconeogenesis),ko00020(Citrate cycle (TCA cycle)),ko00260(Glycine,ko serine and threonine metabolism),ko00280(Valine,ko leucine and isoleucine degradation),ko00620(Pyruvate metabolism),ko01100(Metabolic pathways)
NM_000108	hsa	1738	DLD	dihydrolipoamide dehydrogenase	miR-30b	1	1	2	GO:0004148(dihydrolipoyl dehydrogenase activity),GO:0005737(cytoplasm),GO:0005739(mitochondrion),GO:0005759(mitochondrial matrix),GO:0006086(acetyl-CoA biosynthetic process from pyruvate),GO:0006103(2-oxoglutarate metabolic process),GO:0006120(mitochondrial electron transport, NADH to ubiquinone),GO:0006508(proteolysis),GO:0007369(gastrulation),GO:0007568(aging),GO:0009055(electron carrier activi…	ko00010(Glycolysis / Gluconeogenesis),ko00020(Citrate cycle (TCA cycle)),ko00260(Glycine,ko serine and threonine metabolism),ko00280(Valine,ko leucine and isoleucine degradation),ko00620(Pyruvate metabolism),ko01100(Metabolic pathways)
NM_000108	hsa	1738	DLD	dihydrolipoamide dehydrogenase	miR-3591-3p	1	1	2	GO:0004148(dihydrolipoyl dehydrogenase activity),GO:0005737(cytoplasm),GO:0005739(mitochondrion),GO:0005759(mitochondrial matrix),GO:0006086(acetyl-CoA biosynthetic process from pyruvate),GO:0006103(2-oxoglutarate metabolic process),GO:0006120(mitochondrial electron transport, NADH to ubiquinone),GO:0006508(proteolysis),GO:0007369(gastrulation),GO:0007568(aging),GO:0009055(electron carrier activi…	ko00010(Glycolysis / Gluconeogenesis),ko00020(Citrate cycle (TCA cycle)),ko00260(Glycine,ko serine and threonine metabolism),ko00280(Valine,ko leucine and isoleucine degradation),ko00620(Pyruvate metabolism),ko01100(Metabolic pathways)
NM_000108	hsa	1738	DLD	dihydrolipoamide dehydrogenase	miR-4530	1	1	2	GO:0004148(dihydrolipoyl dehydrogenase activity),GO:0005737(cytoplasm),GO:0005739(mitochondrion),GO:0005759(mitochondrial matrix),GO:0006086(acetyl-CoA biosynthetic process from pyruvate),GO:0006103(2-oxoglutarate metabolic process),GO:0006120(mitochondrial electron transport, NADH to ubiquinone),GO:0006508(proteolysis),GO:0007369(gastrulation),GO:0007568(aging),GO:0009055(electron carrier activi…	ko00010(Glycolysis / Gluconeogenesis),ko00020(Citrate cycle (TCA cycle)),ko00260(Glycine,ko serine and threonine metabolism),ko00280(Valine,ko leucine and isoleucine degradation),ko00620(Pyruvate metabolism),ko01100(Metabolic pathways)
NM_000108	hsa	1738	DLD	dihydrolipoamide dehydrogenase	miR-494	1	1	2	GO:0004148(dihydrolipoyl dehydrogenase activity),GO:0005737(cytoplasm),GO:0005739(mitochondrion),GO:0005759(mitochondrial matrix),GO:0006086(acetyl-CoA biosynthetic process from pyruvate),GO:0006103(2-oxoglutarate metabolic process),GO:0006120(mitochondrial electron transport, NADH to ubiquinone),GO:0006508(proteolysis),GO:0007369(gastrulation),GO:0007568(aging),GO:0009055(electron carrier activi…	ko00010(Glycolysis / Gluconeogenesis),ko00020(Citrate cycle (TCA cycle)),ko00260(Glycine,ko serine and threonine metabolism),ko00280(Valine,ko leucine and isoleucine degradation),ko00620(Pyruvate metabolism),ko01100(Metabolic pathways)
NM_000109	hsa	1756	DMD	dystrophin	miR-320a	1	1	2	GO:0003779(actin binding),GO:0005200(structural constituent of cytoskeleton),GO:0005509(calcium ion binding),GO:0005515(protein binding),GO:0005626(insoluble fraction),GO:0005634(nucleus),GO:0005737(cytoplasm),GO:0005792(microsome),GO:0005856(cytoskeleton),GO:0007517(muscle organ development),GO:0007519(skeletal muscle tissue development),GO:0008270(zinc ion binding),GO:0008307(structural constit…	ko05410(Hypertrophic cardiomyopathy (HCM)),ko05412(Arrhythmogenic right ventricular cardiomyopathy (ARVC)),ko05414(Dilated cardiomyopathy),ko05416(Viral myocarditis)
NM_000109	hsa	1756	DMD	dystrophin	miR-320b	1	1	2	GO:0003779(actin binding),GO:0005200(structural constituent of cytoskeleton),GO:0005509(calcium ion binding),GO:0005515(protein binding),GO:0005626(insoluble fraction),GO:0005634(nucleus),GO:0005737(cytoplasm),GO:0005792(microsome),GO:0005856(cytoskeleton),GO:0007517(muscle organ development),GO:0007519(skeletal muscle tissue development),GO:0008270(zinc ion binding),GO:0008307(structural constit…	ko05410(Hypertrophic cardiomyopathy (HCM)),ko05412(Arrhythmogenic right ventricular cardiomyopathy (ARVC)),ko05414(Dilated cardiomyopathy),ko05416(Viral myocarditis)
NM_000109	hsa	1756	DMD	dystrophin	miR-320c	1	1	2	GO:0003779(actin binding),GO:0005200(structural constituent of cytoskeleton),GO:0005509(calcium ion binding),GO:0005515(protein binding),GO:0005626(insoluble fraction),GO:0005634(nucleus),GO:0005737(cytoplasm),GO:0005792(microsome),GO:0005856(cytoskeleton),GO:0007517(muscle organ development),GO:0007519(skeletal muscle tissue development),GO:0008270(zinc ion binding),GO:0008307(structural constit…	ko05410(Hypertrophic cardiomyopathy (HCM)),ko05412(Arrhythmogenic right ventricular cardiomyopathy (ARVC)),ko05414(Dilated cardiomyopathy),ko05416(Viral myocarditis)
NM_000109	hsa	1756	DMD	dystrophin	miR-4277	1	1	2	GO:0003779(actin binding),GO:0005200(structural constituent of cytoskeleton),GO:0005509(calcium ion binding),GO:0005515(protein binding),GO:0005626(insoluble fraction),GO:0005634(nucleus),GO:0005737(cytoplasm),GO:0005792(microsome),GO:0005856(cytoskeleton),GO:0007517(muscle organ development),GO:0007519(skeletal muscle tissue development),GO:0008270(zinc ion binding),GO:0008307(structural constit…	ko05410(Hypertrophic cardiomyopathy (HCM)),ko05412(Arrhythmogenic right ventricular cardiomyopathy (ARVC)),ko05414(Dilated cardiomyopathy),ko05416(Viral myocarditis)
NM_000110	hsa	1806	DPYD	dihydropyrimidine dehydrogenase	miR-494	1	1	2	GO:0004158(dihydroorotate oxidase activity),GO:0005488(binding),GO:0005506(iron ion binding),GO:0005737(cytoplasm),GO:0005829(cytosol),GO:0006145(purine base catabolic process),GO:0006207('de novo' pyrimidine base biosynthetic process),GO:0006210(thymine catabolic process),GO:0006212(uracil catabolic process),GO:0006214(thymidine catabolic process),GO:0006222(UMP biosynthetic process),GO:0009055(…	ko00240(Pyrimidine metabolism),ko00410(beta-Alanine metabolism),ko00770(Pantothenate and CoA biosynthesis),ko00983(Drug metabolism - other enzymes),ko01100(Metabolic pathways)
NM_000111	hsa	1811	SLC26A3	solute carrier family 26, member 3	miR-494	1	1	2	GO:0003700(transcription factor activity),GO:0003712(transcription cofactor activity),GO:0005215(transporter activity),GO:0005624(membrane fraction),GO:0006820(anion transport),GO:0007588(excretion),GO:0008271(secondary active sulfate transmembrane transporter activity),GO:0008272(sulfate transport),GO:0015297(antiporter activity),GO:0015380(anion exchanger activity),GO:0016020(membrane),GO:00160…
NM_000111	hsa	1811	SLC26A3	solute carrier family 26, member 3	miR-5096	1	1	2	GO:0003700(transcription factor activity),GO:0003712(transcription cofactor activity),GO:0005215(transporter activity),GO:0005624(membrane fraction),GO:0006820(anion transport),GO:0007588(excretion),GO:0008271(secondary active sulfate transmembrane transporter activity),GO:0008272(sulfate transport),GO:0015297(antiporter activity),GO:0015380(anion exchanger activity),GO:0016020(membrane),GO:00160…
NM_000112	hsa	1836	SLC26A2	solute carrier family 26 (sulfate transporter), member 2	miR-1260b	1	1	2	GO:0001503(ossification),GO:0005215(transporter activity),GO:0005624(membrane fraction),GO:0005887(integral to plasma membrane),GO:0008271(secondary active sulfate transmembrane transporter activity),GO:0008272(sulfate transport),GO:0016020(membrane),GO:0055085(transmembrane transport)
NM_000112	hsa	1836	SLC26A2	solute carrier family 26 (sulfate transporter), member 2	miR-19b	1	1	2	GO:0001503(ossification),GO:0005215(transporter activity),GO:0005624(membrane fraction),GO:0005887(integral to plasma membrane),GO:0008271(secondary active sulfate transmembrane transporter activity),GO:0008272(sulfate transport),GO:0016020(membrane),GO:0055085(transmembrane transport)
NM_000112	hsa	1836	SLC26A2	solute carrier family 26 (sulfate transporter), member 2	miR-320a	1	1	2	GO:0001503(ossification),GO:0005215(transporter activity),GO:0005624(membrane fraction),GO:0005887(integral to plasma membrane),GO:0008271(secondary active sulfate transmembrane transporter activity),GO:0008272(sulfate transport),GO:0016020(membrane),GO:0055085(transmembrane transport)
NM_000112	hsa	1836	SLC26A2	solute carrier family 26 (sulfate transporter), member 2	miR-320b	1	1	2	GO:0001503(ossification),GO:0005215(transporter activity),GO:0005624(membrane fraction),GO:0005887(integral to plasma membrane),GO:0008271(secondary active sulfate transmembrane transporter activity),GO:0008272(sulfate transport),GO:0016020(membrane),GO:0055085(transmembrane transport)
NM_000112	hsa	1836	SLC26A2	solute carrier family 26 (sulfate transporter), member 2	miR-320c	1	1	2	GO:0001503(ossification),GO:0005215(transporter activity),GO:0005624(membrane fraction),GO:0005887(integral to plasma membrane),GO:0008271(secondary active sulfate transmembrane transporter activity),GO:0008272(sulfate transport),GO:0016020(membrane),GO:0055085(transmembrane transport)
NM_000112	hsa	1836	SLC26A2	solute carrier family 26 (sulfate transporter), member 2	miR-3591-3p	1	1	2	GO:0001503(ossification),GO:0005215(transporter activity),GO:0005624(membrane fraction),GO:0005887(integral to plasma membrane),GO:0008271(secondary active sulfate transmembrane transporter activity),GO:0008272(sulfate transport),GO:0016020(membrane),GO:0055085(transmembrane transport)
NM_000112	hsa	1836	SLC26A2	solute carrier family 26 (sulfate transporter), member 2	miR-3665	1	1	2	GO:0001503(ossification),GO:0005215(transporter activity),GO:0005624(membrane fraction),GO:0005887(integral to plasma membrane),GO:0008271(secondary active sulfate transmembrane transporter activity),GO:0008272(sulfate transport),GO:0016020(membrane),GO:0055085(transmembrane transport)
NM_000112	hsa	1836	SLC26A2	solute carrier family 26 (sulfate transporter), member 2	miR-4687-3p	1	1	2	GO:0001503(ossification),GO:0005215(transporter activity),GO:0005624(membrane fraction),GO:0005887(integral to plasma membrane),GO:0008271(secondary active sulfate transmembrane transporter activity),GO:0008272(sulfate transport),GO:0016020(membrane),GO:0055085(transmembrane transport)
NM_000112	hsa	1836	SLC26A2	solute carrier family 26 (sulfate transporter), member 2	miR-494	1	1	2	GO:0001503(ossification),GO:0005215(transporter activity),GO:0005624(membrane fraction),GO:0005887(integral to plasma membrane),GO:0008271(secondary active sulfate transmembrane transporter activity),GO:0008272(sulfate transport),GO:0016020(membrane),GO:0055085(transmembrane transport)
NM_000113	hsa	1861	TOR1A	torsin family 1, member A (torsin A)	miR-23c	1	1	2	GO:0000166(nucleotide binding),GO:0004252(serine-type endopeptidase activity),GO:0005524(ATP binding),GO:0005625(soluble fraction),GO:0005634(nucleus),GO:0005737(cytoplasm),GO:0005783(endoplasmic reticulum),GO:0005788(endoplasmic reticulum lumen),GO:0005874(microtubule),GO:0006457(protein folding),GO:0006979(response to oxidative stress),GO:0006986(response to unfolded protein),GO:0016020(membran…
NM_000113	hsa	1861	TOR1A	torsin family 1, member A (torsin A)	miR-4530	1	1	2	GO:0000166(nucleotide binding),GO:0004252(serine-type endopeptidase activity),GO:0005524(ATP binding),GO:0005625(soluble fraction),GO:0005634(nucleus),GO:0005737(cytoplasm),GO:0005783(endoplasmic reticulum),GO:0005788(endoplasmic reticulum lumen),GO:0005874(microtubule),GO:0006457(protein folding),GO:0006979(response to oxidative stress),GO:0006986(response to unfolded protein),GO:0016020(membran…
NM_000113	hsa	1861	TOR1A	torsin family 1, member A (torsin A)	miR-4687-3p	1	1	2	GO:0000166(nucleotide binding),GO:0004252(serine-type endopeptidase activity),GO:0005524(ATP binding),GO:0005625(soluble fraction),GO:0005634(nucleus),GO:0005737(cytoplasm),GO:0005783(endoplasmic reticulum),GO:0005788(endoplasmic reticulum lumen),GO:0005874(microtubule),GO:0006457(protein folding),GO:0006979(response to oxidative stress),GO:0006986(response to unfolded protein),GO:0016020(membran…
NM_000115	hsa	1910	EDNRB	endothelin receptor type B	miR-181d	1	1	2	GO:0001600(endothelin-B receptor activity),GO:0001755(neural crest cell migration),GO:0001934(positive regulation of protein amino acid phosphorylation),GO:0004872(receptor activity),GO:0004930(G-protein coupled receptor activity),GO:0005515(protein binding),GO:0005624(membrane fraction),GO:0005886(plasma membrane),GO:0005887(integral to plasma membrane),GO:0006885(regulation of pH),GO:0007194(ne…	ko04020(Calcium signaling pathway),ko04080(Neuroactive ligand-receptor interaction),ko04916(Melanogenesis)
NM_000115	hsa	1910	EDNRB	endothelin receptor type B	miR-19b	1	1	2	GO:0001600(endothelin-B receptor activity),GO:0001755(neural crest cell migration),GO:0001934(positive regulation of protein amino acid phosphorylation),GO:0004872(receptor activity),GO:0004930(G-protein coupled receptor activity),GO:0005515(protein binding),GO:0005624(membrane fraction),GO:0005886(plasma membrane),GO:0005887(integral to plasma membrane),GO:0006885(regulation of pH),GO:0007194(ne…	ko04020(Calcium signaling pathway),ko04080(Neuroactive ligand-receptor interaction),ko04916(Melanogenesis)
NM_000115	hsa	1910	EDNRB	endothelin receptor type B	miR-23c	1	1	2	GO:0001600(endothelin-B receptor activity),GO:0001755(neural crest cell migration),GO:0001934(positive regulation of protein amino acid phosphorylation),GO:0004872(receptor activity),GO:0004930(G-protein coupled receptor activity),GO:0005515(protein binding),GO:0005624(membrane fraction),GO:0005886(plasma membrane),GO:0005887(integral to plasma membrane),GO:0006885(regulation of pH),GO:0007194(ne…	ko04020(Calcium signaling pathway),ko04080(Neuroactive ligand-receptor interaction),ko04916(Melanogenesis)
NM_000115	hsa	1910	EDNRB	endothelin receptor type B	miR-3935	1	1	2	GO:0001600(endothelin-B receptor activity),GO:0001755(neural crest cell migration),GO:0001934(positive regulation of protein amino acid phosphorylation),GO:0004872(receptor activity),GO:0004930(G-protein coupled receptor activity),GO:0005515(protein binding),GO:0005624(membrane fraction),GO:0005886(plasma membrane),GO:0005887(integral to plasma membrane),GO:0006885(regulation of pH),GO:0007194(ne…	ko04020(Calcium signaling pathway),ko04080(Neuroactive ligand-receptor interaction),ko04916(Melanogenesis)
NM_000116	hsa	6901	TAZ	tafazzin	miR-4534	1	1	2	GO:0005737(cytoplasm),GO:0005739(mitochondrion),GO:0006936(muscle contraction),GO:0007519(skeletal muscle tissue development),GO:0008152(metabolic process),GO:0008415(acyltransferase activity),GO:0016020(membrane),GO:0016021(integral to membrane),GO:0030097(hemopoiesis),GO:0032049(cardiolipin biosynthetic process),GO:0032981(mitochondrial respiratory chain complex I assembly),GO:0042407(cristae f…
NM_000121	hsa	2057	EPOR	erythropoietin receptor	miR-4324	1	1	2	GO:0004900(erythropoietin receptor activity),GO:0005515(protein binding),GO:0005576(extracellular region),GO:0005886(plasma membrane),GO:0005887(integral to plasma membrane),GO:0007165(signal transduction),GO:0007204(elevation of cytosolic calcium ion concentration),GO:0007420(brain development),GO:0007507(heart development),GO:0009790(embryonic development),GO:0046697(decidualization)	ko04060(Cytokine-cytokine receptor interaction),ko04630(Jak-STAT signaling pathway),ko04640(Hematopoietic cell lineage)
NM_000124	hsa	2074	ERCC6	excision repair cross-complementing rodent repair deficiency, complementation group 6	miR-3591-3p	1	1	2	GO:0000166(nucleotide binding),GO:0000303(response to superoxide),GO:0003677(DNA binding),GO:0003678(DNA helicase activity),GO:0003682(chromatin binding),GO:0003711(transcription elongation regulator activity),GO:0005524(ATP binding),GO:0005625(soluble fraction),GO:0005634(nucleus),GO:0005654(nucleoplasm),GO:0005730(nucleolus),GO:0006283(transcription-coupled nucleotide-excision repair),GO:000628…	ko03420(Nucleotide excision repair)
NM_000124	hsa	2074	ERCC6	excision repair cross-complementing rodent repair deficiency, complementation group 6	miR-4324	1	1	2	GO:0000166(nucleotide binding),GO:0000303(response to superoxide),GO:0003677(DNA binding),GO:0003678(DNA helicase activity),GO:0003682(chromatin binding),GO:0003711(transcription elongation regulator activity),GO:0005524(ATP binding),GO:0005625(soluble fraction),GO:0005634(nucleus),GO:0005654(nucleoplasm),GO:0005730(nucleolus),GO:0006283(transcription-coupled nucleotide-excision repair),GO:000628…	ko03420(Nucleotide excision repair)
NM_000125	hsa	2099	ESR1	estrogen receptor 1	miR-103a	1	1	2	GO:0003700(transcription factor activity),GO:0005496(steroid binding),GO:0005515(protein binding),GO:0005634(nucleus),GO:0005737(cytoplasm),GO:0005886(plasma membrane),GO:0006355(regulation of transcription, DNA-dependent),GO:0007165(signal transduction),GO:0008270(zinc ion binding),GO:0016585(chromatin remodeling complex),GO:0030235(nitric-oxide synthase regulator activity),GO:0030284(estrogen r…
NM_000125	hsa	2099	ESR1	estrogen receptor 1	miR-107	1	1	2	GO:0003700(transcription factor activity),GO:0005496(steroid binding),GO:0005515(protein binding),GO:0005634(nucleus),GO:0005737(cytoplasm),GO:0005886(plasma membrane),GO:0006355(regulation of transcription, DNA-dependent),GO:0007165(signal transduction),GO:0008270(zinc ion binding),GO:0016585(chromatin remodeling complex),GO:0030235(nitric-oxide synthase regulator activity),GO:0030284(estrogen r…
NM_000125	hsa	2099	ESR1	estrogen receptor 1	miR-181d	1	1	2	GO:0003700(transcription factor activity),GO:0005496(steroid binding),GO:0005515(protein binding),GO:0005634(nucleus),GO:0005737(cytoplasm),GO:0005886(plasma membrane),GO:0006355(regulation of transcription, DNA-dependent),GO:0007165(signal transduction),GO:0008270(zinc ion binding),GO:0016585(chromatin remodeling complex),GO:0030235(nitric-oxide synthase regulator activity),GO:0030284(estrogen r…
NM_000125	hsa	2099	ESR1	estrogen receptor 1	miR-19b	1	1	2	GO:0003700(transcription factor activity),GO:0005496(steroid binding),GO:0005515(protein binding),GO:0005634(nucleus),GO:0005737(cytoplasm),GO:0005886(plasma membrane),GO:0006355(regulation of transcription, DNA-dependent),GO:0007165(signal transduction),GO:0008270(zinc ion binding),GO:0016585(chromatin remodeling complex),GO:0030235(nitric-oxide synthase regulator activity),GO:0030284(estrogen r…
NM_000125	hsa	2099	ESR1	estrogen receptor 1	miR-4687-3p	1	1	2	GO:0003700(transcription factor activity),GO:0005496(steroid binding),GO:0005515(protein binding),GO:0005634(nucleus),GO:0005737(cytoplasm),GO:0005886(plasma membrane),GO:0006355(regulation of transcription, DNA-dependent),GO:0007165(signal transduction),GO:0008270(zinc ion binding),GO:0016585(chromatin remodeling complex),GO:0030235(nitric-oxide synthase regulator activity),GO:0030284(estrogen r…
NM_000126	hsa	2108	ETFA	electron-transfer-flavoprotein, alpha polypeptide	miR-320a	1	1	2	GO:0005739(mitochondrion),GO:0005759(mitochondrial matrix),GO:0006810(transport),GO:0009055(electron carrier activity),GO:0016491(oxidoreductase activity),GO:0022900(electron transport chain),GO:0050660(FAD binding)
NM_000126	hsa	2108	ETFA	electron-transfer-flavoprotein, alpha polypeptide	miR-320b	1	1	2	GO:0005739(mitochondrion),GO:0005759(mitochondrial matrix),GO:0006810(transport),GO:0009055(electron carrier activity),GO:0016491(oxidoreductase activity),GO:0022900(electron transport chain),GO:0050660(FAD binding)
NM_000126	hsa	2108	ETFA	electron-transfer-flavoprotein, alpha polypeptide	miR-320c	1	1	2	GO:0005739(mitochondrion),GO:0005759(mitochondrial matrix),GO:0006810(transport),GO:0009055(electron carrier activity),GO:0016491(oxidoreductase activity),GO:0022900(electron transport chain),GO:0050660(FAD binding)
NM_000128	hsa	2160	F11	coagulation factor XI	miR-3591-3p	1	1	2	GO:0004252(serine-type endopeptidase activity),GO:0005576(extracellular region),GO:0005615(extracellular space),GO:0006508(proteolysis),GO:0008201(heparin binding),GO:0008233(peptidase activity),GO:0016020(membrane),GO:0030193(regulation of blood coagulation),GO:0031639(plasminogen activation),GO:0051919(positive regulation of fibrinolysis)	ko04610(Complement and coagulation cascades)
NM_000128	hsa	2160	F11	coagulation factor XI	miR-4277	1	1	2	GO:0004252(serine-type endopeptidase activity),GO:0005576(extracellular region),GO:0005615(extracellular space),GO:0006508(proteolysis),GO:0008201(heparin binding),GO:0008233(peptidase activity),GO:0016020(membrane),GO:0030193(regulation of blood coagulation),GO:0031639(plasminogen activation),GO:0051919(positive regulation of fibrinolysis)	ko04610(Complement and coagulation cascades)
NM_000129	hsa	2162	F13A1	coagulation factor XIII, A1 polypeptide	miR-19b	1	1	2	GO:0003810(protein-glutamine gamma-glutamyltransferase activity),GO:0005509(calcium ion binding),GO:0005576(extracellular region),GO:0005737(cytoplasm),GO:0007596(blood coagulation),GO:0008415(acyltransferase activity),GO:0016740(transferase activity),GO:0018149(peptide cross-linking),GO:0031093(platelet alpha granule lumen)	ko04610(Complement and coagulation cascades)
NM_000129	hsa	2162	F13A1	coagulation factor XIII, A1 polypeptide	miR-3665	1	1	2	GO:0003810(protein-glutamine gamma-glutamyltransferase activity),GO:0005509(calcium ion binding),GO:0005576(extracellular region),GO:0005737(cytoplasm),GO:0007596(blood coagulation),GO:0008415(acyltransferase activity),GO:0016740(transferase activity),GO:0018149(peptide cross-linking),GO:0031093(platelet alpha granule lumen)	ko04610(Complement and coagulation cascades)
NM_000129	hsa	2162	F13A1	coagulation factor XIII, A1 polypeptide	miR-4324	1	1	2	GO:0003810(protein-glutamine gamma-glutamyltransferase activity),GO:0005509(calcium ion binding),GO:0005576(extracellular region),GO:0005737(cytoplasm),GO:0007596(blood coagulation),GO:0008415(acyltransferase activity),GO:0016740(transferase activity),GO:0018149(peptide cross-linking),GO:0031093(platelet alpha granule lumen)	ko04610(Complement and coagulation cascades)
NM_000130	hsa	2153	F5	coagulation factor V (proaccelerin, labile factor)	miR-1246	1	1	2	GO:0005507(copper ion binding),GO:0005509(calcium ion binding),GO:0005576(extracellular region),GO:0005886(plasma membrane),GO:0007155(cell adhesion),GO:0007596(blood coagulation),GO:0016491(oxidoreductase activity),GO:0031093(platelet alpha granule lumen),GO:0055114(oxidation reduction)	ko04610(Complement and coagulation cascades)
NM_000130	hsa	2153	F5	coagulation factor V (proaccelerin, labile factor)	miR-181d	1	1	2	GO:0005507(copper ion binding),GO:0005509(calcium ion binding),GO:0005576(extracellular region),GO:0005886(plasma membrane),GO:0007155(cell adhesion),GO:0007596(blood coagulation),GO:0016491(oxidoreductase activity),GO:0031093(platelet alpha granule lumen),GO:0055114(oxidation reduction)	ko04610(Complement and coagulation cascades)
NM_000130	hsa	2153	F5	coagulation factor V (proaccelerin, labile factor)	miR-4277	1	1	2	GO:0005507(copper ion binding),GO:0005509(calcium ion binding),GO:0005576(extracellular region),GO:0005886(plasma membrane),GO:0007155(cell adhesion),GO:0007596(blood coagulation),GO:0016491(oxidoreductase activity),GO:0031093(platelet alpha granule lumen),GO:0055114(oxidation reduction)	ko04610(Complement and coagulation cascades)
NM_000130	hsa	2153	F5	coagulation factor V (proaccelerin, labile factor)	miR-4530	1	1	2	GO:0005507(copper ion binding),GO:0005509(calcium ion binding),GO:0005576(extracellular region),GO:0005886(plasma membrane),GO:0007155(cell adhesion),GO:0007596(blood coagulation),GO:0016491(oxidoreductase activity),GO:0031093(platelet alpha granule lumen),GO:0055114(oxidation reduction)	ko04610(Complement and coagulation cascades)
NM_000130	hsa	2153	F5	coagulation factor V (proaccelerin, labile factor)	miR-4687-3p	1	1	2	GO:0005507(copper ion binding),GO:0005509(calcium ion binding),GO:0005576(extracellular region),GO:0005886(plasma membrane),GO:0007155(cell adhesion),GO:0007596(blood coagulation),GO:0016491(oxidoreductase activity),GO:0031093(platelet alpha granule lumen),GO:0055114(oxidation reduction)	ko04610(Complement and coagulation cascades)
NM_000131	hsa	2155	F7	coagulation factor VII (serum prothrombin conversion accelerator)	miR-3665	1	1	2	GO:0001948(glycoprotein binding),GO:0002690(positive regulation of leukocyte chemotaxis),GO:0004252(serine-type endopeptidase activity),GO:0005509(calcium ion binding),GO:0005576(extracellular region),GO:0005886(plasma membrane),GO:0006508(proteolysis),GO:0006916(anti-apoptosis),GO:0007598(blood coagulation, extrinsic pathway),GO:0008233(peptidase activity),GO:0010641(positive regulation of plate…	ko04610(Complement and coagulation cascades)
NM_000131	hsa	2155	F7	coagulation factor VII (serum prothrombin conversion accelerator)	miR-4530	1	1	2	GO:0001948(glycoprotein binding),GO:0002690(positive regulation of leukocyte chemotaxis),GO:0004252(serine-type endopeptidase activity),GO:0005509(calcium ion binding),GO:0005576(extracellular region),GO:0005886(plasma membrane),GO:0006508(proteolysis),GO:0006916(anti-apoptosis),GO:0007598(blood coagulation, extrinsic pathway),GO:0008233(peptidase activity),GO:0010641(positive regulation of plate…	ko04610(Complement and coagulation cascades)
NM_000132	hsa	2157	F8	coagulation factor VIII, procoagulant component	miR-3665	1	1	2	GO:0005507(copper ion binding),GO:0005509(calcium ion binding),GO:0005515(protein binding),GO:0005576(extracellular region),GO:0005615(extracellular space),GO:0005886(plasma membrane),GO:0006953(acute-phase response),GO:0007155(cell adhesion),GO:0007596(blood coagulation),GO:0016491(oxidoreductase activity),GO:0031093(platelet alpha granule lumen),GO:0055114(oxidation reduction)	ko04610(Complement and coagulation cascades)
NM_000132	hsa	2157	F8	coagulation factor VIII, procoagulant component	miR-4530	1	1	2	GO:0005507(copper ion binding),GO:0005509(calcium ion binding),GO:0005515(protein binding),GO:0005576(extracellular region),GO:0005615(extracellular space),GO:0005886(plasma membrane),GO:0006953(acute-phase response),GO:0007155(cell adhesion),GO:0007596(blood coagulation),GO:0016491(oxidoreductase activity),GO:0031093(platelet alpha granule lumen),GO:0055114(oxidation reduction)	ko04610(Complement and coagulation cascades)
NM_000132	hsa	2157	F8	coagulation factor VIII, procoagulant component	miR-494	1	1	2	GO:0005507(copper ion binding),GO:0005509(calcium ion binding),GO:0005515(protein binding),GO:0005576(extracellular region),GO:0005615(extracellular space),GO:0005886(plasma membrane),GO:0006953(acute-phase response),GO:0007155(cell adhesion),GO:0007596(blood coagulation),GO:0016491(oxidoreductase activity),GO:0031093(platelet alpha granule lumen),GO:0055114(oxidation reduction)	ko04610(Complement and coagulation cascades)
NM_000132	hsa	2157	F8	coagulation factor VIII, procoagulant component	miR-5096	1	1	2	GO:0005507(copper ion binding),GO:0005509(calcium ion binding),GO:0005515(protein binding),GO:0005576(extracellular region),GO:0005615(extracellular space),GO:0005886(plasma membrane),GO:0006953(acute-phase response),GO:0007155(cell adhesion),GO:0007596(blood coagulation),GO:0016491(oxidoreductase activity),GO:0031093(platelet alpha granule lumen),GO:0055114(oxidation reduction)	ko04610(Complement and coagulation cascades)
NM_000133	hsa	2158	F9	coagulation factor IX	miR-3591-3p	1	1	2	GO:0004252(serine-type endopeptidase activity),GO:0005509(calcium ion binding),GO:0005576(extracellular region),GO:0005886(plasma membrane),GO:0006508(proteolysis),GO:0007598(blood coagulation, extrinsic pathway),GO:0008233(peptidase activity)	ko04610(Complement and coagulation cascades)
NM_000133	hsa	2158	F9	coagulation factor IX	miR-494	1	1	2	GO:0004252(serine-type endopeptidase activity),GO:0005509(calcium ion binding),GO:0005576(extracellular region),GO:0005886(plasma membrane),GO:0006508(proteolysis),GO:0007598(blood coagulation, extrinsic pathway),GO:0008233(peptidase activity)	ko04610(Complement and coagulation cascades)
NM_000135	hsa	2175	FANCA	Fanconi anemia, complementation group A	miR-23c	1	1	2	GO:0005515(protein binding),GO:0005634(nucleus),GO:0005737(cytoplasm),GO:0006281(DNA repair),GO:0006461(protein complex assembly),GO:0006974(response to DNA damage stimulus),GO:0007140(male meiosis),GO:0008584(male gonad development),GO:0008585(female gonad development),GO:0042127(regulation of cell proliferation)
NM_000136	hsa	2176	FANCC	Fanconi anemia, complementation group C	miR-103a	1	1	2	GO:0000785(chromatin),GO:0002262(myeloid cell homeostasis),GO:0005515(protein binding),GO:0005634(nucleus),GO:0005737(cytoplasm),GO:0005829(cytosol),GO:0006289(nucleotide-excision repair),GO:0006461(protein complex assembly),GO:0006974(response to DNA damage stimulus),GO:0007281(germ cell development),GO:0019430(removal of superoxide radicals)
NM_000136	hsa	2176	FANCC	Fanconi anemia, complementation group C	miR-107	1	1	2	GO:0000785(chromatin),GO:0002262(myeloid cell homeostasis),GO:0005515(protein binding),GO:0005634(nucleus),GO:0005737(cytoplasm),GO:0005829(cytosol),GO:0006289(nucleotide-excision repair),GO:0006461(protein complex assembly),GO:0006974(response to DNA damage stimulus),GO:0007281(germ cell development),GO:0019430(removal of superoxide radicals)
NM_000136	hsa	2176	FANCC	Fanconi anemia, complementation group C	miR-1260b	1	1	2	GO:0000785(chromatin),GO:0002262(myeloid cell homeostasis),GO:0005515(protein binding),GO:0005634(nucleus),GO:0005737(cytoplasm),GO:0005829(cytosol),GO:0006289(nucleotide-excision repair),GO:0006461(protein complex assembly),GO:0006974(response to DNA damage stimulus),GO:0007281(germ cell development),GO:0019430(removal of superoxide radicals)
NM_000136	hsa	2176	FANCC	Fanconi anemia, complementation group C	miR-4455	1	1	2	GO:0000785(chromatin),GO:0002262(myeloid cell homeostasis),GO:0005515(protein binding),GO:0005634(nucleus),GO:0005737(cytoplasm),GO:0005829(cytosol),GO:0006289(nucleotide-excision repair),GO:0006461(protein complex assembly),GO:0006974(response to DNA damage stimulus),GO:0007281(germ cell development),GO:0019430(removal of superoxide radicals)
NM_000138	hsa	2200	FBN1	fibrillin 1	miR-103a	1	1	2	GO:0001501(skeletal system development),GO:0001527(microfibril),GO:0001822(kidney development),GO:0005201(extracellular matrix structural constituent),GO:0005509(calcium ion binding),GO:0005515(protein binding),GO:0005576(extracellular region),GO:0005604(basement membrane),GO:0005615(extracellular space),GO:0007507(heart development)
NM_000138	hsa	2200	FBN1	fibrillin 1	miR-107	1	1	2	GO:0001501(skeletal system development),GO:0001527(microfibril),GO:0001822(kidney development),GO:0005201(extracellular matrix structural constituent),GO:0005509(calcium ion binding),GO:0005515(protein binding),GO:0005576(extracellular region),GO:0005604(basement membrane),GO:0005615(extracellular space),GO:0007507(heart development)
NM_000138	hsa	2200	FBN1	fibrillin 1	miR-4277	1	1	2	GO:0001501(skeletal system development),GO:0001527(microfibril),GO:0001822(kidney development),GO:0005201(extracellular matrix structural constituent),GO:0005509(calcium ion binding),GO:0005515(protein binding),GO:0005576(extracellular region),GO:0005604(basement membrane),GO:0005615(extracellular space),GO:0007507(heart development)
NM_000138	hsa	2200	FBN1	fibrillin 1	miR-4324	1	1	2	GO:0001501(skeletal system development),GO:0001527(microfibril),GO:0001822(kidney development),GO:0005201(extracellular matrix structural constituent),GO:0005509(calcium ion binding),GO:0005515(protein binding),GO:0005576(extracellular region),GO:0005604(basement membrane),GO:0005615(extracellular space),GO:0007507(heart development)
NM_000138	hsa	2200	FBN1	fibrillin 1	miR-494	1	1	2	GO:0001501(skeletal system development),GO:0001527(microfibril),GO:0001822(kidney development),GO:0005201(extracellular matrix structural constituent),GO:0005509(calcium ion binding),GO:0005515(protein binding),GO:0005576(extracellular region),GO:0005604(basement membrane),GO:0005615(extracellular space),GO:0007507(heart development)
NM_000139	hsa	2206	MS4A2	membrane-spanning 4-domains, subfamily A, member 2 (Fc fragment of IgE, high affinity I, receptor for; beta polypeptide)	miR-4530	1	1	2	GO:0004872(receptor activity),GO:0005262(calcium channel activity),GO:0005768(endosome),GO:0005887(integral to plasma membrane),GO:0006954(inflammatory response),GO:0006959(humoral immune response),GO:0007202(activation of phospholipase C activity),GO:0007205(activation of protein kinase C activity by G-protein coupled receptor protein signaling pathway),GO:0008283(cell proliferation),GO:0009897(…	ko04664(Fc epsilon RI signaling pathway),ko05310(Asthma)
NM_000139	hsa	2206	MS4A2	membrane-spanning 4-domains, subfamily A, member 2 (Fc fragment of IgE, high affinity I, receptor for; beta polypeptide)	miR-4534	1	1	2	GO:0004872(receptor activity),GO:0005262(calcium channel activity),GO:0005768(endosome),GO:0005887(integral to plasma membrane),GO:0006954(inflammatory response),GO:0006959(humoral immune response),GO:0007202(activation of phospholipase C activity),GO:0007205(activation of protein kinase C activity by G-protein coupled receptor protein signaling pathway),GO:0008283(cell proliferation),GO:0009897(…	ko04664(Fc epsilon RI signaling pathway),ko05310(Asthma)
NM_000139	hsa	2206	MS4A2	membrane-spanning 4-domains, subfamily A, member 2 (Fc fragment of IgE, high affinity I, receptor for; beta polypeptide)	miR-5096	1	1	2	GO:0004872(receptor activity),GO:0005262(calcium channel activity),GO:0005768(endosome),GO:0005887(integral to plasma membrane),GO:0006954(inflammatory response),GO:0006959(humoral immune response),GO:0007202(activation of phospholipase C activity),GO:0007205(activation of protein kinase C activity by G-protein coupled receptor protein signaling pathway),GO:0008283(cell proliferation),GO:0009897(…	ko04664(Fc epsilon RI signaling pathway),ko05310(Asthma)
NM_000140	hsa	2235	FECH	ferrochelatase (protoporphyria)	miR-103a	1	1	2	GO:0004325(ferrochelatase activity),GO:0005515(protein binding),GO:0005739(mitochondrion),GO:0005743(mitochondrial inner membrane),GO:0005759(mitochondrial matrix),GO:0006091(generation of precursor metabolites and energy),GO:0006783(heme biosynthetic process),GO:0008198(ferrous iron binding),GO:0009416(response to light stimulus),GO:0016020(membrane),GO:0046501(protoporphyrinogen IX metabolic pr…	ko00860(Porphyrin and chlorophyll metabolism),ko01100(Metabolic pathways)
NM_000140	hsa	2235	FECH	ferrochelatase (protoporphyria)	miR-107	1	1	2	GO:0004325(ferrochelatase activity),GO:0005515(protein binding),GO:0005739(mitochondrion),GO:0005743(mitochondrial inner membrane),GO:0005759(mitochondrial matrix),GO:0006091(generation of precursor metabolites and energy),GO:0006783(heme biosynthetic process),GO:0008198(ferrous iron binding),GO:0009416(response to light stimulus),GO:0016020(membrane),GO:0046501(protoporphyrinogen IX metabolic pr…	ko00860(Porphyrin and chlorophyll metabolism),ko01100(Metabolic pathways)
NM_000140	hsa	2235	FECH	ferrochelatase (protoporphyria)	miR-1260b	1	1	2	GO:0004325(ferrochelatase activity),GO:0005515(protein binding),GO:0005739(mitochondrion),GO:0005743(mitochondrial inner membrane),GO:0005759(mitochondrial matrix),GO:0006091(generation of precursor metabolites and energy),GO:0006783(heme biosynthetic process),GO:0008198(ferrous iron binding),GO:0009416(response to light stimulus),GO:0016020(membrane),GO:0046501(protoporphyrinogen IX metabolic pr…	ko00860(Porphyrin and chlorophyll metabolism),ko01100(Metabolic pathways)
NM_000140	hsa	2235	FECH	ferrochelatase (protoporphyria)	miR-23c	1	1	2	GO:0004325(ferrochelatase activity),GO:0005515(protein binding),GO:0005739(mitochondrion),GO:0005743(mitochondrial inner membrane),GO:0005759(mitochondrial matrix),GO:0006091(generation of precursor metabolites and energy),GO:0006783(heme biosynthetic process),GO:0008198(ferrous iron binding),GO:0009416(response to light stimulus),GO:0016020(membrane),GO:0046501(protoporphyrinogen IX metabolic pr…	ko00860(Porphyrin and chlorophyll metabolism),ko01100(Metabolic pathways)
NM_000140	hsa	2235	FECH	ferrochelatase (protoporphyria)	miR-4443	1	1	2	GO:0004325(ferrochelatase activity),GO:0005515(protein binding),GO:0005739(mitochondrion),GO:0005743(mitochondrial inner membrane),GO:0005759(mitochondrial matrix),GO:0006091(generation of precursor metabolites and energy),GO:0006783(heme biosynthetic process),GO:0008198(ferrous iron binding),GO:0009416(response to light stimulus),GO:0016020(membrane),GO:0046501(protoporphyrinogen IX metabolic pr…	ko00860(Porphyrin and chlorophyll metabolism),ko01100(Metabolic pathways)
NM_000140	hsa	2235	FECH	ferrochelatase (protoporphyria)	miR-4530	1	1	2	GO:0004325(ferrochelatase activity),GO:0005515(protein binding),GO:0005739(mitochondrion),GO:0005743(mitochondrial inner membrane),GO:0005759(mitochondrial matrix),GO:0006091(generation of precursor metabolites and energy),GO:0006783(heme biosynthetic process),GO:0008198(ferrous iron binding),GO:0009416(response to light stimulus),GO:0016020(membrane),GO:0046501(protoporphyrinogen IX metabolic pr…	ko00860(Porphyrin and chlorophyll metabolism),ko01100(Metabolic pathways)
NM_000140	hsa	2235	FECH	ferrochelatase (protoporphyria)	miR-4534	1	1	2	GO:0004325(ferrochelatase activity),GO:0005515(protein binding),GO:0005739(mitochondrion),GO:0005743(mitochondrial inner membrane),GO:0005759(mitochondrial matrix),GO:0006091(generation of precursor metabolites and energy),GO:0006783(heme biosynthetic process),GO:0008198(ferrous iron binding),GO:0009416(response to light stimulus),GO:0016020(membrane),GO:0046501(protoporphyrinogen IX metabolic pr…	ko00860(Porphyrin and chlorophyll metabolism),ko01100(Metabolic pathways)
NM_000140	hsa	2235	FECH	ferrochelatase (protoporphyria)	miR-5096	1	1	2	GO:0004325(ferrochelatase activity),GO:0005515(protein binding),GO:0005739(mitochondrion),GO:0005743(mitochondrial inner membrane),GO:0005759(mitochondrial matrix),GO:0006091(generation of precursor metabolites and energy),GO:0006783(heme biosynthetic process),GO:0008198(ferrous iron binding),GO:0009416(response to light stimulus),GO:0016020(membrane),GO:0046501(protoporphyrinogen IX metabolic pr…	ko00860(Porphyrin and chlorophyll metabolism),ko01100(Metabolic pathways)
NM_000141	hsa	2263	FGFR2	fibroblast growth factor receptor 2	miR-103a	1	1	2	GO:0000166(nucleotide binding),GO:0004872(receptor activity),GO:0005007(fibroblast growth factor receptor activity),GO:0005515(protein binding),GO:0005524(ATP binding),GO:0005576(extracellular region),GO:0005634(nucleus),GO:0005737(cytoplasm),GO:0005886(plasma membrane),GO:0005938(cell cortex),GO:0006468(protein amino acid phosphorylation),GO:0008201(heparin binding),GO:0008284(positive regulatio…	ko04010(MAPK signaling pathway),ko04144(Endocytosis),ko04810(Regulation of actin cytoskeleton),ko05200(Pathways in cancer),ko05215(Prostate cancer)
NM_000141	hsa	2263	FGFR2	fibroblast growth factor receptor 2	miR-107	1	1	2	GO:0000166(nucleotide binding),GO:0004872(receptor activity),GO:0005007(fibroblast growth factor receptor activity),GO:0005515(protein binding),GO:0005524(ATP binding),GO:0005576(extracellular region),GO:0005634(nucleus),GO:0005737(cytoplasm),GO:0005886(plasma membrane),GO:0005938(cell cortex),GO:0006468(protein amino acid phosphorylation),GO:0008201(heparin binding),GO:0008284(positive regulatio…	ko04010(MAPK signaling pathway),ko04144(Endocytosis),ko04810(Regulation of actin cytoskeleton),ko05200(Pathways in cancer),ko05215(Prostate cancer)
NM_000141	hsa	2263	FGFR2	fibroblast growth factor receptor 2	miR-1246	1	1	2	GO:0000166(nucleotide binding),GO:0004872(receptor activity),GO:0005007(fibroblast growth factor receptor activity),GO:0005515(protein binding),GO:0005524(ATP binding),GO:0005576(extracellular region),GO:0005634(nucleus),GO:0005737(cytoplasm),GO:0005886(plasma membrane),GO:0005938(cell cortex),GO:0006468(protein amino acid phosphorylation),GO:0008201(heparin binding),GO:0008284(positive regulatio…	ko04010(MAPK signaling pathway),ko04144(Endocytosis),ko04810(Regulation of actin cytoskeleton),ko05200(Pathways in cancer),ko05215(Prostate cancer)
NM_000141	hsa	2263	FGFR2	fibroblast growth factor receptor 2	miR-3665	1	1	2	GO:0000166(nucleotide binding),GO:0004872(receptor activity),GO:0005007(fibroblast growth factor receptor activity),GO:0005515(protein binding),GO:0005524(ATP binding),GO:0005576(extracellular region),GO:0005634(nucleus),GO:0005737(cytoplasm),GO:0005886(plasma membrane),GO:0005938(cell cortex),GO:0006468(protein amino acid phosphorylation),GO:0008201(heparin binding),GO:0008284(positive regulatio…	ko04010(MAPK signaling pathway),ko04144(Endocytosis),ko04810(Regulation of actin cytoskeleton),ko05200(Pathways in cancer),ko05215(Prostate cancer)
NM_000142	hsa	2261	FGFR3	fibroblast growth factor receptor 3	miR-4455	1	1	2	GO:0000165(MAPKKK cascade),GO:0000166(nucleotide binding),GO:0001501(skeletal system development),GO:0004872(receptor activity),GO:0005007(fibroblast growth factor receptor activity),GO:0005524(ATP binding),GO:0005886(plasma membrane),GO:0005887(integral to plasma membrane),GO:0006468(protein amino acid phosphorylation),GO:0007259(JAK-STAT cascade),GO:0008284(positive regulation of cell prolifera…	ko04010(MAPK signaling pathway),ko04144(Endocytosis),ko04810(Regulation of actin cytoskeleton),ko05200(Pathways in cancer),ko05219(Bladder cancer)
NM_000142	hsa	2261	FGFR3	fibroblast growth factor receptor 3	miR-4530	1	1	2	GO:0000165(MAPKKK cascade),GO:0000166(nucleotide binding),GO:0001501(skeletal system development),GO:0004872(receptor activity),GO:0005007(fibroblast growth factor receptor activity),GO:0005524(ATP binding),GO:0005886(plasma membrane),GO:0005887(integral to plasma membrane),GO:0006468(protein amino acid phosphorylation),GO:0007259(JAK-STAT cascade),GO:0008284(positive regulation of cell prolifera…	ko04010(MAPK signaling pathway),ko04144(Endocytosis),ko04810(Regulation of actin cytoskeleton),ko05200(Pathways in cancer),ko05219(Bladder cancer)
NM_000144	hsa	2395	FXN	frataxin	miR-19b	1	1	2	GO:0005515(protein binding),GO:0005739(mitochondrion),GO:0005759(mitochondrial matrix),GO:0005829(cytosol),GO:0006119(oxidative phosphorylation),GO:0006783(heme biosynthetic process),GO:0006879(cellular iron ion homeostasis),GO:0007005(mitochondrion organization),GO:0007628(adult walking behavior),GO:0008198(ferrous iron binding),GO:0008199(ferric iron binding),GO:0008284(positive regulation of c…
NM_000144	hsa	2395	FXN	frataxin	miR-23c	1	1	2	GO:0005515(protein binding),GO:0005739(mitochondrion),GO:0005759(mitochondrial matrix),GO:0005829(cytosol),GO:0006119(oxidative phosphorylation),GO:0006783(heme biosynthetic process),GO:0006879(cellular iron ion homeostasis),GO:0007005(mitochondrion organization),GO:0007628(adult walking behavior),GO:0008198(ferrous iron binding),GO:0008199(ferric iron binding),GO:0008284(positive regulation of c…
NM_000144	hsa	2395	FXN	frataxin	miR-3591-3p	1	1	2	GO:0005515(protein binding),GO:0005739(mitochondrion),GO:0005759(mitochondrial matrix),GO:0005829(cytosol),GO:0006119(oxidative phosphorylation),GO:0006783(heme biosynthetic process),GO:0006879(cellular iron ion homeostasis),GO:0007005(mitochondrion organization),GO:0007628(adult walking behavior),GO:0008198(ferrous iron binding),GO:0008199(ferric iron binding),GO:0008284(positive regulation of c…
NM_000144	hsa	2395	FXN	frataxin	miR-3665	1	1	2	GO:0005515(protein binding),GO:0005739(mitochondrion),GO:0005759(mitochondrial matrix),GO:0005829(cytosol),GO:0006119(oxidative phosphorylation),GO:0006783(heme biosynthetic process),GO:0006879(cellular iron ion homeostasis),GO:0007005(mitochondrion organization),GO:0007628(adult walking behavior),GO:0008198(ferrous iron binding),GO:0008199(ferric iron binding),GO:0008284(positive regulation of c…
NM_000144	hsa	2395	FXN	frataxin	miR-4443	1	1	2	GO:0005515(protein binding),GO:0005739(mitochondrion),GO:0005759(mitochondrial matrix),GO:0005829(cytosol),GO:0006119(oxidative phosphorylation),GO:0006783(heme biosynthetic process),GO:0006879(cellular iron ion homeostasis),GO:0007005(mitochondrion organization),GO:0007628(adult walking behavior),GO:0008198(ferrous iron binding),GO:0008199(ferric iron binding),GO:0008284(positive regulation of c…
NM_000145	hsa	2492	FSHR	follicle stimulating hormone receptor	miR-19b	1	1	2	GO:0004872(receptor activity),GO:0004963(follicle-stimulating hormone receptor activity),GO:0005515(protein binding),GO:0005768(endosome),GO:0005886(plasma membrane),GO:0007165(signal transduction),GO:0007189(activation of adenylate cyclase activity by G-protein signaling pathway),GO:0007283(spermatogenesis),GO:0007292(female gamete generation),GO:0008585(female gonad development),GO:0009986(cell…	ko04080(Neuroactive ligand-receptor interaction)
NM_000146	hsa	2512	FTL	ferritin, light polypeptide	miR-320a	1	1	2	GO:0005829(cytosol),GO:0006826(iron ion transport),GO:0006879(cellular iron ion homeostasis),GO:0006892(post-Golgi vesicle-mediated transport),GO:0008043(intracellular ferritin complex),GO:0008199(ferric iron binding),GO:0016044(membrane organization),GO:0016491(oxidoreductase activity),GO:0022627(cytosolic small ribosomal subunit),GO:0042802(identical protein binding),GO:0055114(oxidation reduct…
NM_000146	hsa	2512	FTL	ferritin, light polypeptide	miR-320b	1	1	2	GO:0005829(cytosol),GO:0006826(iron ion transport),GO:0006879(cellular iron ion homeostasis),GO:0006892(post-Golgi vesicle-mediated transport),GO:0008043(intracellular ferritin complex),GO:0008199(ferric iron binding),GO:0016044(membrane organization),GO:0016491(oxidoreductase activity),GO:0022627(cytosolic small ribosomal subunit),GO:0042802(identical protein binding),GO:0055114(oxidation reduct…
NM_000146	hsa	2512	FTL	ferritin, light polypeptide	miR-320c	1	1	2	GO:0005829(cytosol),GO:0006826(iron ion transport),GO:0006879(cellular iron ion homeostasis),GO:0006892(post-Golgi vesicle-mediated transport),GO:0008043(intracellular ferritin complex),GO:0008199(ferric iron binding),GO:0016044(membrane organization),GO:0016491(oxidoreductase activity),GO:0022627(cytosolic small ribosomal subunit),GO:0042802(identical protein binding),GO:0055114(oxidation reduct…
NM_000147	hsa	2517	FUCA1	fucosidase, alpha-L- 1, tissue	miR-181d	1	1	2	GO:0004560(alpha-L-fucosidase activity),GO:0005529(sugar binding),GO:0005625(soluble fraction),GO:0005737(cytoplasm),GO:0005764(lysosome),GO:0005975(carbohydrate metabolic process),GO:0006004(fucose metabolic process),GO:0006027(glycosaminoglycan catabolic process),GO:0008152(metabolic process),GO:0016798(hydrolase activity, acting on glycosyl bonds)	ko00511(Other glycan degradation),ko04142(Lysosome)
NM_000147	hsa	2517	FUCA1	fucosidase, alpha-L- 1, tissue	miR-3935	1	1	2	GO:0004560(alpha-L-fucosidase activity),GO:0005529(sugar binding),GO:0005625(soluble fraction),GO:0005737(cytoplasm),GO:0005764(lysosome),GO:0005975(carbohydrate metabolic process),GO:0006004(fucose metabolic process),GO:0006027(glycosaminoglycan catabolic process),GO:0008152(metabolic process),GO:0016798(hydrolase activity, acting on glycosyl bonds)	ko00511(Other glycan degradation),ko04142(Lysosome)
NM_000148	hsa	2523	FUT1	fucosyltransferase 1 (galactoside 2-alpha-L-fucosyltransferase, H blood group)	miR-181d	1	1	2	GO:0005624(membrane fraction),GO:0005794(Golgi apparatus),GO:0005887(integral to plasma membrane),GO:0005975(carbohydrate metabolic process),GO:0006486(protein amino acid glycosylation),GO:0008107(galactoside 2-alpha-L-fucosyltransferase activity),GO:0008417(fucosyltransferase activity),GO:0016020(membrane),GO:0016757(transferase activity, transferring glycosyl groups),GO:0042355(L-fucose catabol…	ko00601(Glycosphingolipid biosynthesis - lacto and neolacto series),ko00603(Glycosphingolipid biosynthesis - globo series),ko01100(Metabolic pathways)
NM_000148	hsa	2523	FUT1	fucosyltransferase 1 (galactoside 2-alpha-L-fucosyltransferase, H blood group)	miR-23c	1	1	2	GO:0005624(membrane fraction),GO:0005794(Golgi apparatus),GO:0005887(integral to plasma membrane),GO:0005975(carbohydrate metabolic process),GO:0006486(protein amino acid glycosylation),GO:0008107(galactoside 2-alpha-L-fucosyltransferase activity),GO:0008417(fucosyltransferase activity),GO:0016020(membrane),GO:0016757(transferase activity, transferring glycosyl groups),GO:0042355(L-fucose catabol…	ko00601(Glycosphingolipid biosynthesis - lacto and neolacto series),ko00603(Glycosphingolipid biosynthesis - globo series),ko01100(Metabolic pathways)
NM_000148	hsa	2523	FUT1	fucosyltransferase 1 (galactoside 2-alpha-L-fucosyltransferase, H blood group)	miR-3665	1	1	2	GO:0005624(membrane fraction),GO:0005794(Golgi apparatus),GO:0005887(integral to plasma membrane),GO:0005975(carbohydrate metabolic process),GO:0006486(protein amino acid glycosylation),GO:0008107(galactoside 2-alpha-L-fucosyltransferase activity),GO:0008417(fucosyltransferase activity),GO:0016020(membrane),GO:0016757(transferase activity, transferring glycosyl groups),GO:0042355(L-fucose catabol…	ko00601(Glycosphingolipid biosynthesis - lacto and neolacto series),ko00603(Glycosphingolipid biosynthesis - globo series),ko01100(Metabolic pathways)
NM_000148	hsa	2523	FUT1	fucosyltransferase 1 (galactoside 2-alpha-L-fucosyltransferase, H blood group)	miR-3935	1	1	2	GO:0005624(membrane fraction),GO:0005794(Golgi apparatus),GO:0005887(integral to plasma membrane),GO:0005975(carbohydrate metabolic process),GO:0006486(protein amino acid glycosylation),GO:0008107(galactoside 2-alpha-L-fucosyltransferase activity),GO:0008417(fucosyltransferase activity),GO:0016020(membrane),GO:0016757(transferase activity, transferring glycosyl groups),GO:0042355(L-fucose catabol…	ko00601(Glycosphingolipid biosynthesis - lacto and neolacto series),ko00603(Glycosphingolipid biosynthesis - globo series),ko01100(Metabolic pathways)
NM_000148	hsa	2523	FUT1	fucosyltransferase 1 (galactoside 2-alpha-L-fucosyltransferase, H blood group)	miR-4324	1	1	2	GO:0005624(membrane fraction),GO:0005794(Golgi apparatus),GO:0005887(integral to plasma membrane),GO:0005975(carbohydrate metabolic process),GO:0006486(protein amino acid glycosylation),GO:0008107(galactoside 2-alpha-L-fucosyltransferase activity),GO:0008417(fucosyltransferase activity),GO:0016020(membrane),GO:0016757(transferase activity, transferring glycosyl groups),GO:0042355(L-fucose catabol…	ko00601(Glycosphingolipid biosynthesis - lacto and neolacto series),ko00603(Glycosphingolipid biosynthesis - globo series),ko01100(Metabolic pathways)
NM_000148	hsa	2523	FUT1	fucosyltransferase 1 (galactoside 2-alpha-L-fucosyltransferase, H blood group)	miR-4455	1	1	2	GO:0005624(membrane fraction),GO:0005794(Golgi apparatus),GO:0005887(integral to plasma membrane),GO:0005975(carbohydrate metabolic process),GO:0006486(protein amino acid glycosylation),GO:0008107(galactoside 2-alpha-L-fucosyltransferase activity),GO:0008417(fucosyltransferase activity),GO:0016020(membrane),GO:0016757(transferase activity, transferring glycosyl groups),GO:0042355(L-fucose catabol…	ko00601(Glycosphingolipid biosynthesis - lacto and neolacto series),ko00603(Glycosphingolipid biosynthesis - globo series),ko01100(Metabolic pathways)
NM_000148	hsa	2523	FUT1	fucosyltransferase 1 (galactoside 2-alpha-L-fucosyltransferase, H blood group)	miR-5096	1	1	2	GO:0005624(membrane fraction),GO:0005794(Golgi apparatus),GO:0005887(integral to plasma membrane),GO:0005975(carbohydrate metabolic process),GO:0006486(protein amino acid glycosylation),GO:0008107(galactoside 2-alpha-L-fucosyltransferase activity),GO:0008417(fucosyltransferase activity),GO:0016020(membrane),GO:0016757(transferase activity, transferring glycosyl groups),GO:0042355(L-fucose catabol…	ko00601(Glycosphingolipid biosynthesis - lacto and neolacto series),ko00603(Glycosphingolipid biosynthesis - globo series),ko01100(Metabolic pathways)
NM_000149	hsa	2525	FUT3	fucosyltransferase 3 (galactoside 3(4)-L-fucosyltransferase, Lewis blood group)	miR-1260b	1	1	2	GO:0005624(membrane fraction),GO:0005794(Golgi apparatus),GO:0005975(carbohydrate metabolic process),GO:0006486(protein amino acid glycosylation),GO:0016020(membrane),GO:0016021(integral to membrane),GO:0016757(transferase activity, transferring glycosyl groups),GO:0017060(3-galactosyl-N-acetylglucosaminide 4-alpha-L-fucosyltransferase activity)	ko00601(Glycosphingolipid biosynthesis - lacto and neolacto series),ko01100(Metabolic pathways)
NM_000149	hsa	2525	FUT3	fucosyltransferase 3 (galactoside 3(4)-L-fucosyltransferase, Lewis blood group)	miR-3665	1	1	2	GO:0005624(membrane fraction),GO:0005794(Golgi apparatus),GO:0005975(carbohydrate metabolic process),GO:0006486(protein amino acid glycosylation),GO:0016020(membrane),GO:0016021(integral to membrane),GO:0016757(transferase activity, transferring glycosyl groups),GO:0017060(3-galactosyl-N-acetylglucosaminide 4-alpha-L-fucosyltransferase activity)	ko00601(Glycosphingolipid biosynthesis - lacto and neolacto series),ko01100(Metabolic pathways)
NM_000149	hsa	2525	FUT3	fucosyltransferase 3 (galactoside 3(4)-L-fucosyltransferase, Lewis blood group)	miR-4530	1	1	2	GO:0005624(membrane fraction),GO:0005794(Golgi apparatus),GO:0005975(carbohydrate metabolic process),GO:0006486(protein amino acid glycosylation),GO:0016020(membrane),GO:0016021(integral to membrane),GO:0016757(transferase activity, transferring glycosyl groups),GO:0017060(3-galactosyl-N-acetylglucosaminide 4-alpha-L-fucosyltransferase activity)	ko00601(Glycosphingolipid biosynthesis - lacto and neolacto series),ko01100(Metabolic pathways)
NM_000150	hsa	2528	FUT6	fucosyltransferase 6 (alpha (1,3) fucosyltransferase)	miR-3665	1	1	2	GO:0005794(Golgi apparatus),GO:0006486(protein amino acid glycosylation),GO:0016020(membrane),GO:0016021(integral to membrane),GO:0016757(transferase activity, transferring glycosyl groups),GO:0017060(3-galactosyl-N-acetylglucosaminide 4-alpha-L-fucosyltransferase activity),GO:0042355(L-fucose catabolic process),GO:0046920(alpha(1,3)-fucosyltransferase activity)	ko00601(Glycosphingolipid biosynthesis - lacto and neolacto series),ko01100(Metabolic pathways)
NM_000150	hsa	2528	FUT6	fucosyltransferase 6 (alpha (1,3) fucosyltransferase)	miR-4530	1	1	2	GO:0005794(Golgi apparatus),GO:0006486(protein amino acid glycosylation),GO:0016020(membrane),GO:0016021(integral to membrane),GO:0016757(transferase activity, transferring glycosyl groups),GO:0017060(3-galactosyl-N-acetylglucosaminide 4-alpha-L-fucosyltransferase activity),GO:0042355(L-fucose catabolic process),GO:0046920(alpha(1,3)-fucosyltransferase activity)	ko00601(Glycosphingolipid biosynthesis - lacto and neolacto series),ko01100(Metabolic pathways)
NM_000150	hsa	2528	FUT6	fucosyltransferase 6 (alpha (1,3) fucosyltransferase)	miR-5096	1	1	2	GO:0005794(Golgi apparatus),GO:0006486(protein amino acid glycosylation),GO:0016020(membrane),GO:0016021(integral to membrane),GO:0016757(transferase activity, transferring glycosyl groups),GO:0017060(3-galactosyl-N-acetylglucosaminide 4-alpha-L-fucosyltransferase activity),GO:0042355(L-fucose catabolic process),GO:0046920(alpha(1,3)-fucosyltransferase activity)	ko00601(Glycosphingolipid biosynthesis - lacto and neolacto series),ko01100(Metabolic pathways)
NM_000151	hsa	2538	G6PC	glucose-6-phosphatase, catalytic subunit	miR-4324	1	1	2	GO:0004346(glucose-6-phosphatase activity),GO:0005783(endoplasmic reticulum),GO:0005789(endoplasmic reticulum membrane),GO:0005792(microsome),GO:0005980(glycogen catabolic process),GO:0006094(gluconeogenesis),GO:0006641(triglyceride metabolic process),GO:0008202(steroid metabolic process),GO:0010468(regulation of gene expression),GO:0015760(glucose-6-phosphate transport),GO:0016020(membrane),GO:0…	ko00010(Glycolysis / Gluconeogenesis),ko00052(Galactose metabolism),ko00500(Starch and sucrose metabolism),ko01100(Metabolic pathways),ko04910(Insulin signaling pathway),ko04920(Adipocytokine signaling pathway)
NM_000151	hsa	2538	G6PC	glucose-6-phosphatase, catalytic subunit	miR-4687-3p	1	1	2	GO:0004346(glucose-6-phosphatase activity),GO:0005783(endoplasmic reticulum),GO:0005789(endoplasmic reticulum membrane),GO:0005792(microsome),GO:0005980(glycogen catabolic process),GO:0006094(gluconeogenesis),GO:0006641(triglyceride metabolic process),GO:0008202(steroid metabolic process),GO:0010468(regulation of gene expression),GO:0015760(glucose-6-phosphate transport),GO:0016020(membrane),GO:0…	ko00010(Glycolysis / Gluconeogenesis),ko00052(Galactose metabolism),ko00500(Starch and sucrose metabolism),ko01100(Metabolic pathways),ko04910(Insulin signaling pathway),ko04920(Adipocytokine signaling pathway)
NM_000151	hsa	2538	G6PC	glucose-6-phosphatase, catalytic subunit	miR-494	1	1	2	GO:0004346(glucose-6-phosphatase activity),GO:0005783(endoplasmic reticulum),GO:0005789(endoplasmic reticulum membrane),GO:0005792(microsome),GO:0005980(glycogen catabolic process),GO:0006094(gluconeogenesis),GO:0006641(triglyceride metabolic process),GO:0008202(steroid metabolic process),GO:0010468(regulation of gene expression),GO:0015760(glucose-6-phosphate transport),GO:0016020(membrane),GO:0…	ko00010(Glycolysis / Gluconeogenesis),ko00052(Galactose metabolism),ko00500(Starch and sucrose metabolism),ko01100(Metabolic pathways),ko04910(Insulin signaling pathway),ko04920(Adipocytokine signaling pathway)
NM_000152	hsa	2548	GAA	glucosidase, alpha; acid	miR-4534	1	1	2	GO:0000023(maltose metabolic process),GO:0002026(regulation of the force of heart contraction),GO:0002086(diaphragm contraction),GO:0003007(heart morphogenesis),GO:0004553(hydrolase activity, hydrolyzing O-glycosyl compounds),GO:0004558(alpha-glucosidase activity),GO:0005764(lysosome),GO:0005975(carbohydrate metabolic process),GO:0005980(glycogen catabolic process),GO:0005985(sucrose metabolic pr…	ko00052(Galactose metabolism),ko00500(Starch and sucrose metabolism),ko01100(Metabolic pathways),ko04142(Lysosome)
NM_000153	hsa	2581	GALC	galactosylceramidase	miR-103a	1	1	2	GO:0004336(galactosylceramidase activity),GO:0005764(lysosome),GO:0005975(carbohydrate metabolic process),GO:0006683(galactosylceramide catabolic process),GO:0008152(metabolic process),GO:0016798(hydrolase activity, acting on glycosyl bonds),GO:0043169(cation binding)	ko00600(Sphingolipid metabolism),ko01100(Metabolic pathways),ko04142(Lysosome)
NM_000153	hsa	2581	GALC	galactosylceramidase	miR-107	1	1	2	GO:0004336(galactosylceramidase activity),GO:0005764(lysosome),GO:0005975(carbohydrate metabolic process),GO:0006683(galactosylceramide catabolic process),GO:0008152(metabolic process),GO:0016798(hydrolase activity, acting on glycosyl bonds),GO:0043169(cation binding)	ko00600(Sphingolipid metabolism),ko01100(Metabolic pathways),ko04142(Lysosome)
NM_000154	hsa	2584	GALK1	galactokinase 1	miR-4443	1	1	2	GO:0000166(nucleotide binding),GO:0004335(galactokinase activity),GO:0005515(protein binding),GO:0005524(ATP binding),GO:0005534(galactose binding),GO:0005624(membrane fraction),GO:0005737(cytoplasm),GO:0005829(cytosol),GO:0005975(carbohydrate metabolic process),GO:0006012(galactose metabolic process),GO:0008152(metabolic process),GO:0016301(kinase activity),GO:0016740(transferase activity),GO:00…	ko00052(Galactose metabolism),ko00520(Amino sugar and nucleotide sugar metabolism),ko01100(Metabolic pathways)
NM_000156	hsa	2593	GAMT	guanidinoacetate N-methyltransferase	miR-4455	1	1	2	GO:0005829(cytosol),GO:0006601(creatine biosynthetic process),GO:0006936(muscle contraction),GO:0008168(methyltransferase activity),GO:0016740(transferase activity),GO:0030731(guanidinoacetate N-methyltransferase activity)	ko00260(Glycine,ko serine and threonine metabolism),ko00330(Arginine and proline metabolism),ko01100(Metabolic pathways)
NM_000160	hsa	2642	GCGR	glucagon receptor	miR-3665	1	1	2	GO:0004967(glucagon receptor activity),GO:0005886(plasma membrane),GO:0006091(generation of precursor metabolites and energy),GO:0006887(exocytosis),GO:0007186(G-protein coupled receptor protein signaling pathway),GO:0007188(G-protein signaling, coupled to cAMP nucleotide second messenger),GO:0007584(response to nutrient),GO:0008217(regulation of blood pressure),GO:0009755(hormone-mediated signal…	ko04080(Neuroactive ligand-receptor interaction)
NM_000161	hsa	2643	GCH1	GTP cyclohydrolase 1	miR-494	1	1	2	GO:0000166(nucleotide binding),GO:0003934(GTP cyclohydrolase I activity),GO:0005509(calcium ion binding),GO:0005525(GTP binding),GO:0005625(soluble fraction),GO:0005634(nucleus),GO:0005737(cytoplasm),GO:0005829(cytosol),GO:0006184(GTP catabolic process),GO:0006461(protein complex assembly),GO:0006729(tetrahydrobiopterin biosynthetic process),GO:0006809(nitric oxide biosynthetic process),GO:000691…	ko00790(Folate biosynthesis),ko01100(Metabolic pathways)
NM_000162	hsa	2645	GCK	glucokinase (hexokinase 4)	miR-4455	1	1	2	GO:0000166(nucleotide binding),GO:0004340(glucokinase activity),GO:0005515(protein binding),GO:0005524(ATP binding),GO:0005536(glucose binding),GO:0005654(nucleoplasm),GO:0005829(cytosol),GO:0005975(carbohydrate metabolic process),GO:0006006(glucose metabolic process),GO:0006096(glycolysis),GO:0016301(kinase activity),GO:0016740(transferase activity),GO:0032024(positive regulation of insulin secr…	ko00010(Glycolysis / Gluconeogenesis),ko00052(Galactose metabolism),ko00500(Starch and sucrose metabolism),ko00520(Amino sugar and nucleotide sugar metabolism),ko01100(Metabolic pathways),ko04910(Insulin signaling pathway),ko04930(Type II diabetes mellitus),ko04950(Maturity onset diabetes of the young)
NM_000163	hsa	2690	GHR	growth hormone receptor	miR-19b	1	1	2	GO:0000187(activation of MAPK activity),GO:0000255(allantoin metabolic process),GO:0004872(receptor activity),GO:0004903(growth hormone receptor activity),GO:0005576(extracellular region),GO:0005615(extracellular space),GO:0005634(nucleus),GO:0005737(cytoplasm),GO:0005739(mitochondrion),GO:0005886(plasma membrane),GO:0005887(integral to plasma membrane),GO:0006101(citrate metabolic process),GO:00…	ko04060(Cytokine-cytokine receptor interaction),ko04080(Neuroactive ligand-receptor interaction),ko04630(Jak-STAT signaling pathway)
NM_000163	hsa	2690	GHR	growth hormone receptor	miR-320a	1	1	2	GO:0000187(activation of MAPK activity),GO:0000255(allantoin metabolic process),GO:0004872(receptor activity),GO:0004903(growth hormone receptor activity),GO:0005576(extracellular region),GO:0005615(extracellular space),GO:0005634(nucleus),GO:0005737(cytoplasm),GO:0005739(mitochondrion),GO:0005886(plasma membrane),GO:0005887(integral to plasma membrane),GO:0006101(citrate metabolic process),GO:00…	ko04060(Cytokine-cytokine receptor interaction),ko04080(Neuroactive ligand-receptor interaction),ko04630(Jak-STAT signaling pathway)
NM_000163	hsa	2690	GHR	growth hormone receptor	miR-320b	1	1	2	GO:0000187(activation of MAPK activity),GO:0000255(allantoin metabolic process),GO:0004872(receptor activity),GO:0004903(growth hormone receptor activity),GO:0005576(extracellular region),GO:0005615(extracellular space),GO:0005634(nucleus),GO:0005737(cytoplasm),GO:0005739(mitochondrion),GO:0005886(plasma membrane),GO:0005887(integral to plasma membrane),GO:0006101(citrate metabolic process),GO:00…	ko04060(Cytokine-cytokine receptor interaction),ko04080(Neuroactive ligand-receptor interaction),ko04630(Jak-STAT signaling pathway)
NM_000163	hsa	2690	GHR	growth hormone receptor	miR-320c	1	1	2	GO:0000187(activation of MAPK activity),GO:0000255(allantoin metabolic process),GO:0004872(receptor activity),GO:0004903(growth hormone receptor activity),GO:0005576(extracellular region),GO:0005615(extracellular space),GO:0005634(nucleus),GO:0005737(cytoplasm),GO:0005739(mitochondrion),GO:0005886(plasma membrane),GO:0005887(integral to plasma membrane),GO:0006101(citrate metabolic process),GO:00…	ko04060(Cytokine-cytokine receptor interaction),ko04080(Neuroactive ligand-receptor interaction),ko04630(Jak-STAT signaling pathway)
NM_000163	hsa	2690	GHR	growth hormone receptor	miR-4455	1	1	2	GO:0000187(activation of MAPK activity),GO:0000255(allantoin metabolic process),GO:0004872(receptor activity),GO:0004903(growth hormone receptor activity),GO:0005576(extracellular region),GO:0005615(extracellular space),GO:0005634(nucleus),GO:0005737(cytoplasm),GO:0005739(mitochondrion),GO:0005886(plasma membrane),GO:0005887(integral to plasma membrane),GO:0006101(citrate metabolic process),GO:00…	ko04060(Cytokine-cytokine receptor interaction),ko04080(Neuroactive ligand-receptor interaction),ko04630(Jak-STAT signaling pathway)
NM_000163	hsa	2690	GHR	growth hormone receptor	miR-4687-3p	1	1	2	GO:0000187(activation of MAPK activity),GO:0000255(allantoin metabolic process),GO:0004872(receptor activity),GO:0004903(growth hormone receptor activity),GO:0005576(extracellular region),GO:0005615(extracellular space),GO:0005634(nucleus),GO:0005737(cytoplasm),GO:0005739(mitochondrion),GO:0005886(plasma membrane),GO:0005887(integral to plasma membrane),GO:0006101(citrate metabolic process),GO:00…	ko04060(Cytokine-cytokine receptor interaction),ko04080(Neuroactive ligand-receptor interaction),ko04630(Jak-STAT signaling pathway)
NM_000164	hsa	2696	GIPR	gastric inhibitory polypeptide receptor	miR-5096	1	1	2	GO:0005886(plasma membrane),GO:0006091(generation of precursor metabolites and energy),GO:0007186(G-protein coupled receptor protein signaling pathway),GO:0007189(activation of adenylate cyclase activity by G-protein signaling pathway),GO:0007204(elevation of cytosolic calcium ion concentration),GO:0007584(response to nutrient),GO:0016021(integral to membrane),GO:0016519(gastric inhibitory peptid…	ko04080(Neuroactive ligand-receptor interaction)
NM_000165	hsa	2697	GJA1	gap junction protein, alpha 1, 43kDa	miR-19b	1	1	2	GO:0004871(signal transducer activity),GO:0005515(protein binding),GO:0005794(Golgi apparatus),GO:0005886(plasma membrane),GO:0005887(integral to plasma membrane),GO:0005922(connexon complex),GO:0006810(transport),GO:0006936(muscle contraction),GO:0007267(cell-cell signaling),GO:0007507(heart development),GO:0015075(ion transmembrane transporter activity),GO:0016264(gap junction assembly),GO:0022…	ko04540(Gap junction),ko05412(Arrhythmogenic right ventricular cardiomyopathy (ARVC))
NM_000165	hsa	2697	GJA1	gap junction protein, alpha 1, 43kDa	miR-23c	1	1	2	GO:0004871(signal transducer activity),GO:0005515(protein binding),GO:0005794(Golgi apparatus),GO:0005886(plasma membrane),GO:0005887(integral to plasma membrane),GO:0005922(connexon complex),GO:0006810(transport),GO:0006936(muscle contraction),GO:0007267(cell-cell signaling),GO:0007507(heart development),GO:0015075(ion transmembrane transporter activity),GO:0016264(gap junction assembly),GO:0022…	ko04540(Gap junction),ko05412(Arrhythmogenic right ventricular cardiomyopathy (ARVC))
NM_000165	hsa	2697	GJA1	gap junction protein, alpha 1, 43kDa	miR-30b	1	1	2	GO:0004871(signal transducer activity),GO:0005515(protein binding),GO:0005794(Golgi apparatus),GO:0005886(plasma membrane),GO:0005887(integral to plasma membrane),GO:0005922(connexon complex),GO:0006810(transport),GO:0006936(muscle contraction),GO:0007267(cell-cell signaling),GO:0007507(heart development),GO:0015075(ion transmembrane transporter activity),GO:0016264(gap junction assembly),GO:0022…	ko04540(Gap junction),ko05412(Arrhythmogenic right ventricular cardiomyopathy (ARVC))
NM_000165	hsa	2697	GJA1	gap junction protein, alpha 1, 43kDa	miR-3591-3p	1	1	2	GO:0004871(signal transducer activity),GO:0005515(protein binding),GO:0005794(Golgi apparatus),GO:0005886(plasma membrane),GO:0005887(integral to plasma membrane),GO:0005922(connexon complex),GO:0006810(transport),GO:0006936(muscle contraction),GO:0007267(cell-cell signaling),GO:0007507(heart development),GO:0015075(ion transmembrane transporter activity),GO:0016264(gap junction assembly),GO:0022…	ko04540(Gap junction),ko05412(Arrhythmogenic right ventricular cardiomyopathy (ARVC))
NM_000165	hsa	2697	GJA1	gap junction protein, alpha 1, 43kDa	miR-4534	1	1	2	GO:0004871(signal transducer activity),GO:0005515(protein binding),GO:0005794(Golgi apparatus),GO:0005886(plasma membrane),GO:0005887(integral to plasma membrane),GO:0005922(connexon complex),GO:0006810(transport),GO:0006936(muscle contraction),GO:0007267(cell-cell signaling),GO:0007507(heart development),GO:0015075(ion transmembrane transporter activity),GO:0016264(gap junction assembly),GO:0022…	ko04540(Gap junction),ko05412(Arrhythmogenic right ventricular cardiomyopathy (ARVC))
NM_000165	hsa	2697	GJA1	gap junction protein, alpha 1, 43kDa	miR-4687-3p	1	1	2	GO:0004871(signal transducer activity),GO:0005515(protein binding),GO:0005794(Golgi apparatus),GO:0005886(plasma membrane),GO:0005887(integral to plasma membrane),GO:0005922(connexon complex),GO:0006810(transport),GO:0006936(muscle contraction),GO:0007267(cell-cell signaling),GO:0007507(heart development),GO:0015075(ion transmembrane transporter activity),GO:0016264(gap junction assembly),GO:0022…	ko04540(Gap junction),ko05412(Arrhythmogenic right ventricular cardiomyopathy (ARVC))
NM_000165	hsa	2697	GJA1	gap junction protein, alpha 1, 43kDa	miR-5096	1	1	2	GO:0004871(signal transducer activity),GO:0005515(protein binding),GO:0005794(Golgi apparatus),GO:0005886(plasma membrane),GO:0005887(integral to plasma membrane),GO:0005922(connexon complex),GO:0006810(transport),GO:0006936(muscle contraction),GO:0007267(cell-cell signaling),GO:0007507(heart development),GO:0015075(ion transmembrane transporter activity),GO:0016264(gap junction assembly),GO:0022…	ko04540(Gap junction),ko05412(Arrhythmogenic right ventricular cardiomyopathy (ARVC))
NM_000166	hsa	2705	GJB1	gap junction protein, beta 1, 32kDa	miR-4530	1	1	2	GO:0005243(gap junction channel activity),GO:0005783(endoplasmic reticulum),GO:0005789(endoplasmic reticulum membrane),GO:0005886(plasma membrane),GO:0005922(connexon complex),GO:0006810(transport),GO:0007267(cell-cell signaling),GO:0007399(nervous system development),GO:0015868(purine ribonucleotide transport),GO:0016021(integral to membrane),GO:0030054(cell junction),GO:0051259(protein oligomer…
NM_000167	hsa	2710	GK	glycerol kinase	miR-181d	1	1	2	GO:0000166(nucleotide binding),GO:0004370(glycerol kinase activity),GO:0005524(ATP binding),GO:0005737(cytoplasm),GO:0005739(mitochondrion),GO:0005741(mitochondrial outer membrane),GO:0005829(cytosol),GO:0005975(carbohydrate metabolic process),GO:0006072(glycerol-3-phosphate metabolic process),GO:0016020(membrane),GO:0016740(transferase activity)	ko00561(Glycerolipid metabolism),ko01100(Metabolic pathways),ko03320(PPAR signaling pathway)
NM_000167	hsa	2710	GK	glycerol kinase	miR-30b	1	1	2	GO:0000166(nucleotide binding),GO:0004370(glycerol kinase activity),GO:0005524(ATP binding),GO:0005737(cytoplasm),GO:0005739(mitochondrion),GO:0005741(mitochondrial outer membrane),GO:0005829(cytosol),GO:0005975(carbohydrate metabolic process),GO:0006072(glycerol-3-phosphate metabolic process),GO:0016020(membrane),GO:0016740(transferase activity)	ko00561(Glycerolipid metabolism),ko01100(Metabolic pathways),ko03320(PPAR signaling pathway)
NM_000167	hsa	2710	GK	glycerol kinase	miR-4687-3p	1	1	2	GO:0000166(nucleotide binding),GO:0004370(glycerol kinase activity),GO:0005524(ATP binding),GO:0005737(cytoplasm),GO:0005739(mitochondrion),GO:0005741(mitochondrial outer membrane),GO:0005829(cytosol),GO:0005975(carbohydrate metabolic process),GO:0006072(glycerol-3-phosphate metabolic process),GO:0016020(membrane),GO:0016740(transferase activity)	ko00561(Glycerolipid metabolism),ko01100(Metabolic pathways),ko03320(PPAR signaling pathway)
NM_000167	hsa	2710	GK	glycerol kinase	miR-494	1	1	2	GO:0000166(nucleotide binding),GO:0004370(glycerol kinase activity),GO:0005524(ATP binding),GO:0005737(cytoplasm),GO:0005739(mitochondrion),GO:0005741(mitochondrial outer membrane),GO:0005829(cytosol),GO:0005975(carbohydrate metabolic process),GO:0006072(glycerol-3-phosphate metabolic process),GO:0016020(membrane),GO:0016740(transferase activity)	ko00561(Glycerolipid metabolism),ko01100(Metabolic pathways),ko03320(PPAR signaling pathway)
NM_000168	hsa	2737	GLI3	GLI family zinc finger 3	miR-103a	1	1	2	GO:0000122(negative regulation of transcription from RNA polymerase II promoter),GO:0001656(metanephros development),GO:0001658(branching involved in ureteric bud morphogenesis),GO:0001701(in utero embryonic development),GO:0003682(chromatin binding),GO:0003700(transcription factor activity),GO:0005622(intracellular),GO:0005634(nucleus),GO:0005730(nucleolus),GO:0005737(cytoplasm),GO:0005829(cytos…	ko04340(Hedgehog signaling pathway),ko05200(Pathways in cancer),ko05217(Basal cell carcinoma)
NM_000168	hsa	2737	GLI3	GLI family zinc finger 3	miR-107	1	1	2	GO:0000122(negative regulation of transcription from RNA polymerase II promoter),GO:0001656(metanephros development),GO:0001658(branching involved in ureteric bud morphogenesis),GO:0001701(in utero embryonic development),GO:0003682(chromatin binding),GO:0003700(transcription factor activity),GO:0005622(intracellular),GO:0005634(nucleus),GO:0005730(nucleolus),GO:0005737(cytoplasm),GO:0005829(cytos…	ko04340(Hedgehog signaling pathway),ko05200(Pathways in cancer),ko05217(Basal cell carcinoma)
NM_000168	hsa	2737	GLI3	GLI family zinc finger 3	miR-320a	1	1	2	GO:0000122(negative regulation of transcription from RNA polymerase II promoter),GO:0001656(metanephros development),GO:0001658(branching involved in ureteric bud morphogenesis),GO:0001701(in utero embryonic development),GO:0003682(chromatin binding),GO:0003700(transcription factor activity),GO:0005622(intracellular),GO:0005634(nucleus),GO:0005730(nucleolus),GO:0005737(cytoplasm),GO:0005829(cytos…	ko04340(Hedgehog signaling pathway),ko05200(Pathways in cancer),ko05217(Basal cell carcinoma)
NM_000168	hsa	2737	GLI3	GLI family zinc finger 3	miR-320b	1	1	2	GO:0000122(negative regulation of transcription from RNA polymerase II promoter),GO:0001656(metanephros development),GO:0001658(branching involved in ureteric bud morphogenesis),GO:0001701(in utero embryonic development),GO:0003682(chromatin binding),GO:0003700(transcription factor activity),GO:0005622(intracellular),GO:0005634(nucleus),GO:0005730(nucleolus),GO:0005737(cytoplasm),GO:0005829(cytos…	ko04340(Hedgehog signaling pathway),ko05200(Pathways in cancer),ko05217(Basal cell carcinoma)
NM_000168	hsa	2737	GLI3	GLI family zinc finger 3	miR-320c	1	1	2	GO:0000122(negative regulation of transcription from RNA polymerase II promoter),GO:0001656(metanephros development),GO:0001658(branching involved in ureteric bud morphogenesis),GO:0001701(in utero embryonic development),GO:0003682(chromatin binding),GO:0003700(transcription factor activity),GO:0005622(intracellular),GO:0005634(nucleus),GO:0005730(nucleolus),GO:0005737(cytoplasm),GO:0005829(cytos…	ko04340(Hedgehog signaling pathway),ko05200(Pathways in cancer),ko05217(Basal cell carcinoma)
NM_000168	hsa	2737	GLI3	GLI family zinc finger 3	miR-4443	1	1	2	GO:0000122(negative regulation of transcription from RNA polymerase II promoter),GO:0001656(metanephros development),GO:0001658(branching involved in ureteric bud morphogenesis),GO:0001701(in utero embryonic development),GO:0003682(chromatin binding),GO:0003700(transcription factor activity),GO:0005622(intracellular),GO:0005634(nucleus),GO:0005730(nucleolus),GO:0005737(cytoplasm),GO:0005829(cytos…	ko04340(Hedgehog signaling pathway),ko05200(Pathways in cancer),ko05217(Basal cell carcinoma)
NM_000168	hsa	2737	GLI3	GLI family zinc finger 3	miR-4455	1	1	2	GO:0000122(negative regulation of transcription from RNA polymerase II promoter),GO:0001656(metanephros development),GO:0001658(branching involved in ureteric bud morphogenesis),GO:0001701(in utero embryonic development),GO:0003682(chromatin binding),GO:0003700(transcription factor activity),GO:0005622(intracellular),GO:0005634(nucleus),GO:0005730(nucleolus),GO:0005737(cytoplasm),GO:0005829(cytos…	ko04340(Hedgehog signaling pathway),ko05200(Pathways in cancer),ko05217(Basal cell carcinoma)
NM_000170	hsa	2731	GLDC	glycine dehydrogenase (decarboxylating)	miR-30b	1	1	2	GO:0004375(glycine dehydrogenase (decarboxylating) activity),GO:0005739(mitochondrion),GO:0006520(cellular amino acid metabolic process),GO:0006546(glycine catabolic process),GO:0009055(electron carrier activity),GO:0016491(oxidoreductase activity),GO:0016829(lyase activity),GO:0030170(pyridoxal phosphate binding),GO:0055114(oxidation reduction)	ko00260(Glycine,ko serine and threonine metabolism),ko01100(Metabolic pathways)
NM_000172	hsa	2779	GNAT1	guanine nucleotide binding protein (G protein), alpha transducing activity polypeptide 1	miR-103a	1	1	2	GO:0000035(acyl binding),GO:0000166(nucleotide binding),GO:0001917(photoreceptor inner segment),GO:0003924(GTPase activity),GO:0004871(signal transducer activity),GO:0005515(protein binding),GO:0005525(GTP binding),GO:0005886(plasma membrane),GO:0007186(G-protein coupled receptor protein signaling pathway),GO:0007603(phototransduction, visible light),GO:0008283(cell proliferation),GO:0009416(resp…
NM_000172	hsa	2779	GNAT1	guanine nucleotide binding protein (G protein), alpha transducing activity polypeptide 1	miR-107	1	1	2	GO:0000035(acyl binding),GO:0000166(nucleotide binding),GO:0001917(photoreceptor inner segment),GO:0003924(GTPase activity),GO:0004871(signal transducer activity),GO:0005515(protein binding),GO:0005525(GTP binding),GO:0005886(plasma membrane),GO:0007186(G-protein coupled receptor protein signaling pathway),GO:0007603(phototransduction, visible light),GO:0008283(cell proliferation),GO:0009416(resp…
NM_000172	hsa	2779	GNAT1	guanine nucleotide binding protein (G protein), alpha transducing activity polypeptide 1	miR-181d	1	1	2	GO:0000035(acyl binding),GO:0000166(nucleotide binding),GO:0001917(photoreceptor inner segment),GO:0003924(GTPase activity),GO:0004871(signal transducer activity),GO:0005515(protein binding),GO:0005525(GTP binding),GO:0005886(plasma membrane),GO:0007186(G-protein coupled receptor protein signaling pathway),GO:0007603(phototransduction, visible light),GO:0008283(cell proliferation),GO:0009416(resp…
NM_000172	hsa	2779	GNAT1	guanine nucleotide binding protein (G protein), alpha transducing activity polypeptide 1	miR-19b	1	1	2	GO:0000035(acyl binding),GO:0000166(nucleotide binding),GO:0001917(photoreceptor inner segment),GO:0003924(GTPase activity),GO:0004871(signal transducer activity),GO:0005515(protein binding),GO:0005525(GTP binding),GO:0005886(plasma membrane),GO:0007186(G-protein coupled receptor protein signaling pathway),GO:0007603(phototransduction, visible light),GO:0008283(cell proliferation),GO:0009416(resp…
NM_000172	hsa	2779	GNAT1	guanine nucleotide binding protein (G protein), alpha transducing activity polypeptide 1	miR-3591-3p	1	1	2	GO:0000035(acyl binding),GO:0000166(nucleotide binding),GO:0001917(photoreceptor inner segment),GO:0003924(GTPase activity),GO:0004871(signal transducer activity),GO:0005515(protein binding),GO:0005525(GTP binding),GO:0005886(plasma membrane),GO:0007186(G-protein coupled receptor protein signaling pathway),GO:0007603(phototransduction, visible light),GO:0008283(cell proliferation),GO:0009416(resp…
NM_000173	hsa	2811	GP1BA	glycoprotein Ib (platelet), alpha polypeptide	miR-103a	1	1	2	GO:0005515(protein binding),GO:0005624(membrane fraction),GO:0005886(plasma membrane),GO:0005887(integral to plasma membrane),GO:0007155(cell adhesion),GO:0007166(cell surface receptor linked signal transduction),GO:0015057(thrombin receptor activity),GO:0030168(platelet activation),GO:0030193(regulation of blood coagulation),GO:0042730(fibrinolysis)	ko04512(ECM-receptor interaction),ko04640(Hematopoietic cell lineage)
NM_000173	hsa	2811	GP1BA	glycoprotein Ib (platelet), alpha polypeptide	miR-107	1	1	2	GO:0005515(protein binding),GO:0005624(membrane fraction),GO:0005886(plasma membrane),GO:0005887(integral to plasma membrane),GO:0007155(cell adhesion),GO:0007166(cell surface receptor linked signal transduction),GO:0015057(thrombin receptor activity),GO:0030168(platelet activation),GO:0030193(regulation of blood coagulation),GO:0042730(fibrinolysis)	ko04512(ECM-receptor interaction),ko04640(Hematopoietic cell lineage)
NM_000175	hsa	2821	GPI	glucose phosphate isomerase	miR-4455	1	1	2	GO:0001525(angiogenesis),GO:0004347(glucose-6-phosphate isomerase activity),GO:0005125(cytokine activity),GO:0005576(extracellular region),GO:0005615(extracellular space),GO:0005737(cytoplasm),GO:0005975(carbohydrate metabolic process),GO:0006094(gluconeogenesis),GO:0006096(glycolysis),GO:0006959(humoral immune response),GO:0007599(hemostasis),GO:0008083(growth factor activity),GO:0016853(isomera…	ko00010(Glycolysis / Gluconeogenesis),ko00030(Pentose phosphate pathway),ko00500(Starch and sucrose metabolism),ko00520(Amino sugar and nucleotide sugar metabolism),ko01100(Metabolic pathways)
NM_000176	hsa	2908	NR3C1	nuclear receptor subfamily 3, group C, member 1 (glucocorticoid receptor)	miR-181d	1	1	2	GO:0003700(transcription factor activity),GO:0004883(glucocorticoid receptor activity),GO:0005496(steroid binding),GO:0005515(protein binding),GO:0005634(nucleus),GO:0005730(nucleolus),GO:0005737(cytoplasm),GO:0005759(mitochondrial matrix),GO:0006355(regulation of transcription, DNA-dependent),GO:0006366(transcription from RNA polymerase II promoter),GO:0007165(signal transduction),GO:0008270(zin…	ko04080(Neuroactive ligand-receptor interaction)
NM_000176	hsa	2908	NR3C1	nuclear receptor subfamily 3, group C, member 1 (glucocorticoid receptor)	miR-4277	1	1	2	GO:0003700(transcription factor activity),GO:0004883(glucocorticoid receptor activity),GO:0005496(steroid binding),GO:0005515(protein binding),GO:0005634(nucleus),GO:0005730(nucleolus),GO:0005737(cytoplasm),GO:0005759(mitochondrial matrix),GO:0006355(regulation of transcription, DNA-dependent),GO:0006366(transcription from RNA polymerase II promoter),GO:0007165(signal transduction),GO:0008270(zin…	ko04080(Neuroactive ligand-receptor interaction)
NM_000176	hsa	2908	NR3C1	nuclear receptor subfamily 3, group C, member 1 (glucocorticoid receptor)	miR-4455	1	1	2	GO:0003700(transcription factor activity),GO:0004883(glucocorticoid receptor activity),GO:0005496(steroid binding),GO:0005515(protein binding),GO:0005634(nucleus),GO:0005730(nucleolus),GO:0005737(cytoplasm),GO:0005759(mitochondrial matrix),GO:0006355(regulation of transcription, DNA-dependent),GO:0006366(transcription from RNA polymerase II promoter),GO:0007165(signal transduction),GO:0008270(zin…	ko04080(Neuroactive ligand-receptor interaction)
NM_000176	hsa	2908	NR3C1	nuclear receptor subfamily 3, group C, member 1 (glucocorticoid receptor)	miR-4530	1	1	2	GO:0003700(transcription factor activity),GO:0004883(glucocorticoid receptor activity),GO:0005496(steroid binding),GO:0005515(protein binding),GO:0005634(nucleus),GO:0005730(nucleolus),GO:0005737(cytoplasm),GO:0005759(mitochondrial matrix),GO:0006355(regulation of transcription, DNA-dependent),GO:0006366(transcription from RNA polymerase II promoter),GO:0007165(signal transduction),GO:0008270(zin…	ko04080(Neuroactive ligand-receptor interaction)
NM_000176	hsa	2908	NR3C1	nuclear receptor subfamily 3, group C, member 1 (glucocorticoid receptor)	miR-5096	1	1	2	GO:0003700(transcription factor activity),GO:0004883(glucocorticoid receptor activity),GO:0005496(steroid binding),GO:0005515(protein binding),GO:0005634(nucleus),GO:0005730(nucleolus),GO:0005737(cytoplasm),GO:0005759(mitochondrial matrix),GO:0006355(regulation of transcription, DNA-dependent),GO:0006366(transcription from RNA polymerase II promoter),GO:0007165(signal transduction),GO:0008270(zin…	ko04080(Neuroactive ligand-receptor interaction)
NM_000180	hsa	3000	GUCY2D	guanylate cyclase 2D, membrane (retina-specific)	miR-5096	1	1	2	GO:0000166(nucleotide binding),GO:0004383(guanylate cyclase activity),GO:0004713(protein tyrosine kinase activity),GO:0004872(receptor activity),GO:0005524(ATP binding),GO:0005525(GTP binding),GO:0005640(nuclear outer membrane),GO:0005886(plasma membrane),GO:0005887(integral to plasma membrane),GO:0006182(cGMP biosynthetic process),GO:0006468(protein amino acid phosphorylation),GO:0007168(recepto…	ko00230(Purine metabolism),ko04740(Olfactory transduction)
NM_000185	hsa	3053	SERPIND1	serpin peptidase inhibitor, clade D (heparin cofactor), member 1	miR-1246	1	1	2	GO:0004867(serine-type endopeptidase inhibitor activity),GO:0005576(extracellular region),GO:0006935(chemotaxis),GO:0007596(blood coagulation),GO:0008201(heparin binding)	ko04610(Complement and coagulation cascades)
NM_000188	hsa	3098	HK1	hexokinase 1	miR-4443	1	1	2	GO:0000166(nucleotide binding),GO:0004396(hexokinase activity),GO:0005524(ATP binding),GO:0005739(mitochondrion),GO:0005741(mitochondrial outer membrane),GO:0005829(cytosol),GO:0005975(carbohydrate metabolic process),GO:0006096(glycolysis),GO:0016020(membrane),GO:0016301(kinase activity),GO:0016740(transferase activity)	ko00010(Glycolysis / Gluconeogenesis),ko00051(Fructose and mannose metabolism),ko00052(Galactose metabolism),ko00500(Starch and sucrose metabolism),ko00520(Amino sugar and nucleotide sugar metabolism),ko01100(Metabolic pathways),ko04910(Insulin signaling pathway),ko04930(Type II diabetes mellitus)
NM_000189	hsa	3099	HK2	hexokinase 2	miR-181d	1	1	2	GO:0000166(nucleotide binding),GO:0004396(hexokinase activity),GO:0005524(ATP binding),GO:0005536(glucose binding),GO:0005739(mitochondrion),GO:0005741(mitochondrial outer membrane),GO:0005829(cytosol),GO:0005975(carbohydrate metabolic process),GO:0006006(glucose metabolic process),GO:0006096(glycolysis),GO:0007595(lactation),GO:0016020(membrane),GO:0016301(kinase activity),GO:0016740(transferase…	ko00010(Glycolysis / Gluconeogenesis),ko00051(Fructose and mannose metabolism),ko00052(Galactose metabolism),ko00500(Starch and sucrose metabolism),ko00520(Amino sugar and nucleotide sugar metabolism),ko01100(Metabolic pathways),ko04910(Insulin signaling pathway),ko04930(Type II diabetes mellitus)
NM_000189	hsa	3099	HK2	hexokinase 2	miR-4687-3p	1	1	2	GO:0000166(nucleotide binding),GO:0004396(hexokinase activity),GO:0005524(ATP binding),GO:0005536(glucose binding),GO:0005739(mitochondrion),GO:0005741(mitochondrial outer membrane),GO:0005829(cytosol),GO:0005975(carbohydrate metabolic process),GO:0006006(glucose metabolic process),GO:0006096(glycolysis),GO:0007595(lactation),GO:0016020(membrane),GO:0016301(kinase activity),GO:0016740(transferase…	ko00010(Glycolysis / Gluconeogenesis),ko00051(Fructose and mannose metabolism),ko00052(Galactose metabolism),ko00500(Starch and sucrose metabolism),ko00520(Amino sugar and nucleotide sugar metabolism),ko01100(Metabolic pathways),ko04910(Insulin signaling pathway),ko04930(Type II diabetes mellitus)
NM_000189	hsa	3099	HK2	hexokinase 2	miR-5096	1	1	2	GO:0000166(nucleotide binding),GO:0004396(hexokinase activity),GO:0005524(ATP binding),GO:0005536(glucose binding),GO:0005739(mitochondrion),GO:0005741(mitochondrial outer membrane),GO:0005829(cytosol),GO:0005975(carbohydrate metabolic process),GO:0006006(glucose metabolic process),GO:0006096(glycolysis),GO:0007595(lactation),GO:0016020(membrane),GO:0016301(kinase activity),GO:0016740(transferase…	ko00010(Glycolysis / Gluconeogenesis),ko00051(Fructose and mannose metabolism),ko00052(Galactose metabolism),ko00500(Starch and sucrose metabolism),ko00520(Amino sugar and nucleotide sugar metabolism),ko01100(Metabolic pathways),ko04910(Insulin signaling pathway),ko04930(Type II diabetes mellitus)
NM_000190	hsa	3145	HMBS	hydroxymethylbilane synthase	miR-181d	1	1	2	GO:0000793(condensed chromosome),GO:0004418(hydroxymethylbilane synthase activity),GO:0005634(nucleus),GO:0005737(cytoplasm),GO:0005739(mitochondrion),GO:0006783(heme biosynthetic process),GO:0016740(transferase activity),GO:0031406(carboxylic acid binding),GO:0043176(amine binding),GO:0050662(coenzyme binding)	ko00860(Porphyrin and chlorophyll metabolism),ko01100(Metabolic pathways)
NM_000190	hsa	3145	HMBS	hydroxymethylbilane synthase	miR-4687-3p	1	1	2	GO:0000793(condensed chromosome),GO:0004418(hydroxymethylbilane synthase activity),GO:0005634(nucleus),GO:0005737(cytoplasm),GO:0005739(mitochondrion),GO:0006783(heme biosynthetic process),GO:0016740(transferase activity),GO:0031406(carboxylic acid binding),GO:0043176(amine binding),GO:0050662(coenzyme binding)	ko00860(Porphyrin and chlorophyll metabolism),ko01100(Metabolic pathways)
NM_000191	hsa	3155	HMGCL	3-hydroxymethyl-3-methylglutaryl-Coenzyme A lyase	miR-181d	1	1	2	GO:0000062(acyl-CoA binding),GO:0004419(hydroxymethylglutaryl-CoA lyase activity),GO:0005739(mitochondrion),GO:0005743(mitochondrial inner membrane),GO:0005759(mitochondrial matrix),GO:0006637(acyl-CoA metabolic process),GO:0008152(metabolic process),GO:0016829(lyase activity),GO:0031406(carboxylic acid binding),GO:0046872(metal ion binding),GO:0046951(ketone body biosynthetic process)	ko00072(Synthesis and degradation of ketone bodies),ko00280(Valine,ko leucine and isoleucine degradation),ko00650(Butanoate metabolism),ko01100(Metabolic pathways)
NM_000191	hsa	3155	HMGCL	3-hydroxymethyl-3-methylglutaryl-Coenzyme A lyase	miR-23c	1	1	2	GO:0000062(acyl-CoA binding),GO:0004419(hydroxymethylglutaryl-CoA lyase activity),GO:0005739(mitochondrion),GO:0005743(mitochondrial inner membrane),GO:0005759(mitochondrial matrix),GO:0006637(acyl-CoA metabolic process),GO:0008152(metabolic process),GO:0016829(lyase activity),GO:0031406(carboxylic acid binding),GO:0046872(metal ion binding),GO:0046951(ketone body biosynthetic process)	ko00072(Synthesis and degradation of ketone bodies),ko00280(Valine,ko leucine and isoleucine degradation),ko00650(Butanoate metabolism),ko01100(Metabolic pathways)
NM_000191	hsa	3155	HMGCL	3-hydroxymethyl-3-methylglutaryl-Coenzyme A lyase	miR-4324	1	1	2	GO:0000062(acyl-CoA binding),GO:0004419(hydroxymethylglutaryl-CoA lyase activity),GO:0005739(mitochondrion),GO:0005743(mitochondrial inner membrane),GO:0005759(mitochondrial matrix),GO:0006637(acyl-CoA metabolic process),GO:0008152(metabolic process),GO:0016829(lyase activity),GO:0031406(carboxylic acid binding),GO:0046872(metal ion binding),GO:0046951(ketone body biosynthetic process)	ko00072(Synthesis and degradation of ketone bodies),ko00280(Valine,ko leucine and isoleucine degradation),ko00650(Butanoate metabolism),ko01100(Metabolic pathways)
NM_000192	hsa	6910	TBX5	T-box 5	miR-3591-3p	1	1	2	GO:0002009(morphogenesis of an epithelium),GO:0003700(transcription factor activity),GO:0003702(RNA polymerase II transcription factor activity),GO:0005634(nucleus),GO:0005737(cytoplasm),GO:0006917(induction of apoptosis),GO:0007267(cell-cell signaling),GO:0007389(pattern specification process),GO:0007507(heart development),GO:0008134(transcription factor binding),GO:0010552(positive regulation o…
NM_000192	hsa	6910	TBX5	T-box 5	miR-4455	1	1	2	GO:0002009(morphogenesis of an epithelium),GO:0003700(transcription factor activity),GO:0003702(RNA polymerase II transcription factor activity),GO:0005634(nucleus),GO:0005737(cytoplasm),GO:0006917(induction of apoptosis),GO:0007267(cell-cell signaling),GO:0007389(pattern specification process),GO:0007507(heart development),GO:0008134(transcription factor binding),GO:0010552(positive regulation o…
NM_000192	hsa	6910	TBX5	T-box 5	miR-4534	1	1	2	GO:0002009(morphogenesis of an epithelium),GO:0003700(transcription factor activity),GO:0003702(RNA polymerase II transcription factor activity),GO:0005634(nucleus),GO:0005737(cytoplasm),GO:0006917(induction of apoptosis),GO:0007267(cell-cell signaling),GO:0007389(pattern specification process),GO:0007507(heart development),GO:0008134(transcription factor binding),GO:0010552(positive regulation o…
NM_000194	hsa	3251	HPRT1	hypoxanthine phosphoribosyltransferase 1	miR-19b	1	1	2	GO:0000287(magnesium ion binding),GO:0004422(hypoxanthine phosphoribosyltransferase activity),GO:0005515(protein binding),GO:0005737(cytoplasm),GO:0005829(cytosol),GO:0006164(purine nucleotide biosynthetic process),GO:0006166(purine ribonucleoside salvage),GO:0007610(behavior),GO:0009116(nucleoside metabolic process),GO:0016757(transferase activity, transferring glycosyl groups),GO:0042803(protei…	ko00230(Purine metabolism),ko00983(Drug metabolism - other enzymes),ko01100(Metabolic pathways)
NM_000196	hsa	3291	HSD11B2	hydroxysteroid (11-beta) dehydrogenase 2	miR-4455	1	1	2	GO:0001666(response to hypoxia),GO:0002017(regulation of blood volume by renal aldosterone),GO:0003845(11-beta-hydroxysteroid dehydrogenase activity),GO:0005488(binding),GO:0005496(steroid binding),GO:0005737(cytoplasm),GO:0005783(endoplasmic reticulum),GO:0005792(microsome),GO:0006704(glucocorticoid biosynthetic process),GO:0007565(female pregnancy),GO:0016491(oxidoreductase activity),GO:0032094…	ko00140(C21-Steroid hormone metabolism),ko00150(Androgen and estrogen metabolism),ko01100(Metabolic pathways)
NM_000202	hsa	3423	IDS	iduronate 2-sulfatase	miR-1246	1	1	2	GO:0004423(iduronate-2-sulfatase activity),GO:0005509(calcium ion binding),GO:0005515(protein binding),GO:0005764(lysosome),GO:0008152(metabolic process),GO:0016787(hydrolase activity)	ko00531(Glycosaminoglycan degradation),ko01100(Metabolic pathways),ko04142(Lysosome)
NM_000202	hsa	3423	IDS	iduronate 2-sulfatase	miR-4687-3p	1	1	2	GO:0004423(iduronate-2-sulfatase activity),GO:0005509(calcium ion binding),GO:0005515(protein binding),GO:0005764(lysosome),GO:0008152(metabolic process),GO:0016787(hydrolase activity)	ko00531(Glycosaminoglycan degradation),ko01100(Metabolic pathways),ko04142(Lysosome)
NM_000202	hsa	3423	IDS	iduronate 2-sulfatase	miR-5096	1	1	2	GO:0004423(iduronate-2-sulfatase activity),GO:0005509(calcium ion binding),GO:0005515(protein binding),GO:0005764(lysosome),GO:0008152(metabolic process),GO:0016787(hydrolase activity)	ko00531(Glycosaminoglycan degradation),ko01100(Metabolic pathways),ko04142(Lysosome)
NM_000202	hsa	3423	IDS	iduronate 2-sulfatase	miR-720	1	1	2	GO:0004423(iduronate-2-sulfatase activity),GO:0005509(calcium ion binding),GO:0005515(protein binding),GO:0005764(lysosome),GO:0008152(metabolic process),GO:0016787(hydrolase activity)	ko00531(Glycosaminoglycan degradation),ko01100(Metabolic pathways),ko04142(Lysosome)
NM_000203	hsa	3425	IDUA	iduronidase, alpha-L-	miR-720	1	1	2	GO:0003940(L-iduronidase activity),GO:0005764(lysosome),GO:0005975(carbohydrate metabolic process),GO:0005984(disaccharide metabolic process),GO:0008152(metabolic process),GO:0043169(cation binding)	ko00531(Glycosaminoglycan degradation),ko01100(Metabolic pathways),ko04142(Lysosome)
NM_000206	hsa	3561	IL2RG	interleukin 2 receptor, gamma (severe combined immunodeficiency)	miR-3665	1	1	2	GO:0004872(receptor activity),GO:0004911(interleukin-2 receptor activity),GO:0004913(interleukin-4 receptor activity),GO:0004917(interleukin-7 receptor activity),GO:0005515(protein binding),GO:0005887(integral to plasma membrane),GO:0006955(immune response),GO:0007165(signal transduction),GO:0009897(external side of plasma membrane),GO:0010468(regulation of gene expression),GO:0016020(membrane),G…	ko04060(Cytokine-cytokine receptor interaction),ko04144(Endocytosis),ko04630(Jak-STAT signaling pathway),ko05340(Primary immunodeficiency)
NM_000208	hsa	3643	INSR	insulin receptor	miR-4484	1	1	2	GO:0000166(nucleotide binding),GO:0000187(activation of MAPK activity),GO:0001933(negative regulation of protein amino acid phosphorylation),GO:0001934(positive regulation of protein amino acid phosphorylation),GO:0003007(heart morphogenesis),GO:0004716(receptor signaling protein tyrosine kinase activity),GO:0004872(receptor activity),GO:0005009(insulin receptor activity),GO:0005159(insulin-like …	ko04520(Adherens junction),ko04910(Insulin signaling pathway),ko04930(Type II diabetes mellitus)
NM_000208	hsa	3643	INSR	insulin receptor	miR-4530	1	1	2	GO:0000166(nucleotide binding),GO:0000187(activation of MAPK activity),GO:0001933(negative regulation of protein amino acid phosphorylation),GO:0001934(positive regulation of protein amino acid phosphorylation),GO:0003007(heart morphogenesis),GO:0004716(receptor signaling protein tyrosine kinase activity),GO:0004872(receptor activity),GO:0005009(insulin receptor activity),GO:0005159(insulin-like …	ko04520(Adherens junction),ko04910(Insulin signaling pathway),ko04930(Type II diabetes mellitus)
NM_000209	hsa	3651	PDX1	pancreatic and duodenal homeobox 1	miR-4530	1	1	2	GO:0000122(negative regulation of transcription from RNA polymerase II promoter),GO:0003700(transcription factor activity),GO:0003704(specific RNA polymerase II transcription factor activity),GO:0005515(protein binding),GO:0005634(nucleus),GO:0006006(glucose metabolic process),GO:0006091(generation of precursor metabolites and energy),GO:0007263(nitric oxide mediated signal transduction),GO:00072…	ko04930(Type II diabetes mellitus),ko04950(Maturity onset diabetes of the young)
NM_000210	hsa	3655	ITGA6	integrin, alpha 6	miR-181d	1	1	2	GO:0004872(receptor activity),GO:0005178(integrin binding),GO:0005509(calcium ion binding),GO:0005886(plasma membrane),GO:0005913(cell-cell adherens junction),GO:0007160(cell-matrix adhesion),GO:0007229(integrin-mediated signaling pathway),GO:0008305(integrin complex),GO:0009897(external side of plasma membrane),GO:0016021(integral to membrane),GO:0016323(basolateral plasma membrane),GO:0022409(p…	ko04510(Focal adhesion),ko04512(ECM-receptor interaction),ko04514(Cell adhesion molecules (CAMs)),ko04640(Hematopoietic cell lineage),ko04810(Regulation of actin cytoskeleton),ko05200(Pathways in cancer),ko05222(Small cell lung cancer),ko05410(Hypertrophic cardiomyopathy (HCM)),ko05412(Arrhythmogenic right ventricular cardiomyopathy (ARVC)),ko05414(Dilated cardiomyopathy)
NM_000210	hsa	3655	ITGA6	integrin, alpha 6	miR-19b	1	1	2	GO:0004872(receptor activity),GO:0005178(integrin binding),GO:0005509(calcium ion binding),GO:0005886(plasma membrane),GO:0005913(cell-cell adherens junction),GO:0007160(cell-matrix adhesion),GO:0007229(integrin-mediated signaling pathway),GO:0008305(integrin complex),GO:0009897(external side of plasma membrane),GO:0016021(integral to membrane),GO:0016323(basolateral plasma membrane),GO:0022409(p…	ko04510(Focal adhesion),ko04512(ECM-receptor interaction),ko04514(Cell adhesion molecules (CAMs)),ko04640(Hematopoietic cell lineage),ko04810(Regulation of actin cytoskeleton),ko05200(Pathways in cancer),ko05222(Small cell lung cancer),ko05410(Hypertrophic cardiomyopathy (HCM)),ko05412(Arrhythmogenic right ventricular cardiomyopathy (ARVC)),ko05414(Dilated cardiomyopathy)
NM_000210	hsa	3655	ITGA6	integrin, alpha 6	miR-30b	1	1	2	GO:0004872(receptor activity),GO:0005178(integrin binding),GO:0005509(calcium ion binding),GO:0005886(plasma membrane),GO:0005913(cell-cell adherens junction),GO:0007160(cell-matrix adhesion),GO:0007229(integrin-mediated signaling pathway),GO:0008305(integrin complex),GO:0009897(external side of plasma membrane),GO:0016021(integral to membrane),GO:0016323(basolateral plasma membrane),GO:0022409(p…	ko04510(Focal adhesion),ko04512(ECM-receptor interaction),ko04514(Cell adhesion molecules (CAMs)),ko04640(Hematopoietic cell lineage),ko04810(Regulation of actin cytoskeleton),ko05200(Pathways in cancer),ko05222(Small cell lung cancer),ko05410(Hypertrophic cardiomyopathy (HCM)),ko05412(Arrhythmogenic right ventricular cardiomyopathy (ARVC)),ko05414(Dilated cardiomyopathy)
NM_000210	hsa	3655	ITGA6	integrin, alpha 6	miR-3591-3p	1	1	2	GO:0004872(receptor activity),GO:0005178(integrin binding),GO:0005509(calcium ion binding),GO:0005886(plasma membrane),GO:0005913(cell-cell adherens junction),GO:0007160(cell-matrix adhesion),GO:0007229(integrin-mediated signaling pathway),GO:0008305(integrin complex),GO:0009897(external side of plasma membrane),GO:0016021(integral to membrane),GO:0016323(basolateral plasma membrane),GO:0022409(p…	ko04510(Focal adhesion),ko04512(ECM-receptor interaction),ko04514(Cell adhesion molecules (CAMs)),ko04640(Hematopoietic cell lineage),ko04810(Regulation of actin cytoskeleton),ko05200(Pathways in cancer),ko05222(Small cell lung cancer),ko05410(Hypertrophic cardiomyopathy (HCM)),ko05412(Arrhythmogenic right ventricular cardiomyopathy (ARVC)),ko05414(Dilated cardiomyopathy)
NM_000210	hsa	3655	ITGA6	integrin, alpha 6	miR-3665	1	1	2	GO:0004872(receptor activity),GO:0005178(integrin binding),GO:0005509(calcium ion binding),GO:0005886(plasma membrane),GO:0005913(cell-cell adherens junction),GO:0007160(cell-matrix adhesion),GO:0007229(integrin-mediated signaling pathway),GO:0008305(integrin complex),GO:0009897(external side of plasma membrane),GO:0016021(integral to membrane),GO:0016323(basolateral plasma membrane),GO:0022409(p…	ko04510(Focal adhesion),ko04512(ECM-receptor interaction),ko04514(Cell adhesion molecules (CAMs)),ko04640(Hematopoietic cell lineage),ko04810(Regulation of actin cytoskeleton),ko05200(Pathways in cancer),ko05222(Small cell lung cancer),ko05410(Hypertrophic cardiomyopathy (HCM)),ko05412(Arrhythmogenic right ventricular cardiomyopathy (ARVC)),ko05414(Dilated cardiomyopathy)
NM_000210	hsa	3655	ITGA6	integrin, alpha 6	miR-4687-3p	1	1	2	GO:0004872(receptor activity),GO:0005178(integrin binding),GO:0005509(calcium ion binding),GO:0005886(plasma membrane),GO:0005913(cell-cell adherens junction),GO:0007160(cell-matrix adhesion),GO:0007229(integrin-mediated signaling pathway),GO:0008305(integrin complex),GO:0009897(external side of plasma membrane),GO:0016021(integral to membrane),GO:0016323(basolateral plasma membrane),GO:0022409(p…	ko04510(Focal adhesion),ko04512(ECM-receptor interaction),ko04514(Cell adhesion molecules (CAMs)),ko04640(Hematopoietic cell lineage),ko04810(Regulation of actin cytoskeleton),ko05200(Pathways in cancer),ko05222(Small cell lung cancer),ko05410(Hypertrophic cardiomyopathy (HCM)),ko05412(Arrhythmogenic right ventricular cardiomyopathy (ARVC)),ko05414(Dilated cardiomyopathy)
NM_000210	hsa	3655	ITGA6	integrin, alpha 6	miR-494	1	1	2	GO:0004872(receptor activity),GO:0005178(integrin binding),GO:0005509(calcium ion binding),GO:0005886(plasma membrane),GO:0005913(cell-cell adherens junction),GO:0007160(cell-matrix adhesion),GO:0007229(integrin-mediated signaling pathway),GO:0008305(integrin complex),GO:0009897(external side of plasma membrane),GO:0016021(integral to membrane),GO:0016323(basolateral plasma membrane),GO:0022409(p…	ko04510(Focal adhesion),ko04512(ECM-receptor interaction),ko04514(Cell adhesion molecules (CAMs)),ko04640(Hematopoietic cell lineage),ko04810(Regulation of actin cytoskeleton),ko05200(Pathways in cancer),ko05222(Small cell lung cancer),ko05410(Hypertrophic cardiomyopathy (HCM)),ko05412(Arrhythmogenic right ventricular cardiomyopathy (ARVC)),ko05414(Dilated cardiomyopathy)
NM_000212	hsa	3690	ITGB3	integrin, beta 3 (platelet glycoprotein IIIa, antigen CD61)	miR-19b	1	1	2	GO:0004872(receptor activity),GO:0005178(integrin binding),GO:0005886(plasma membrane),GO:0007044(cell-substrate junction assembly),GO:0007155(cell adhesion),GO:0007160(cell-matrix adhesion),GO:0007229(integrin-mediated signaling pathway),GO:0007596(blood coagulation),GO:0008305(integrin complex),GO:0009897(external side of plasma membrane),GO:0010745(negative regulation of macrophage derived foa…	ko04510(Focal adhesion),ko04512(ECM-receptor interaction),ko04640(Hematopoietic cell lineage),ko04810(Regulation of actin cytoskeleton),ko05410(Hypertrophic cardiomyopathy (HCM)),ko05412(Arrhythmogenic right ventricular cardiomyopathy (ARVC)),ko05414(Dilated cardiomyopathy)
NM_000212	hsa	3690	ITGB3	integrin, beta 3 (platelet glycoprotein IIIa, antigen CD61)	miR-30b	1	1	2	GO:0004872(receptor activity),GO:0005178(integrin binding),GO:0005886(plasma membrane),GO:0007044(cell-substrate junction assembly),GO:0007155(cell adhesion),GO:0007160(cell-matrix adhesion),GO:0007229(integrin-mediated signaling pathway),GO:0007596(blood coagulation),GO:0008305(integrin complex),GO:0009897(external side of plasma membrane),GO:0010745(negative regulation of macrophage derived foa…	ko04510(Focal adhesion),ko04512(ECM-receptor interaction),ko04640(Hematopoietic cell lineage),ko04810(Regulation of actin cytoskeleton),ko05410(Hypertrophic cardiomyopathy (HCM)),ko05412(Arrhythmogenic right ventricular cardiomyopathy (ARVC)),ko05414(Dilated cardiomyopathy)
NM_000212	hsa	3690	ITGB3	integrin, beta 3 (platelet glycoprotein IIIa, antigen CD61)	miR-3591-3p	1	1	2	GO:0004872(receptor activity),GO:0005178(integrin binding),GO:0005886(plasma membrane),GO:0007044(cell-substrate junction assembly),GO:0007155(cell adhesion),GO:0007160(cell-matrix adhesion),GO:0007229(integrin-mediated signaling pathway),GO:0007596(blood coagulation),GO:0008305(integrin complex),GO:0009897(external side of plasma membrane),GO:0010745(negative regulation of macrophage derived foa…	ko04510(Focal adhesion),ko04512(ECM-receptor interaction),ko04640(Hematopoietic cell lineage),ko04810(Regulation of actin cytoskeleton),ko05410(Hypertrophic cardiomyopathy (HCM)),ko05412(Arrhythmogenic right ventricular cardiomyopathy (ARVC)),ko05414(Dilated cardiomyopathy)
NM_000212	hsa	3690	ITGB3	integrin, beta 3 (platelet glycoprotein IIIa, antigen CD61)	miR-4324	1	1	2	GO:0004872(receptor activity),GO:0005178(integrin binding),GO:0005886(plasma membrane),GO:0007044(cell-substrate junction assembly),GO:0007155(cell adhesion),GO:0007160(cell-matrix adhesion),GO:0007229(integrin-mediated signaling pathway),GO:0007596(blood coagulation),GO:0008305(integrin complex),GO:0009897(external side of plasma membrane),GO:0010745(negative regulation of macrophage derived foa…	ko04510(Focal adhesion),ko04512(ECM-receptor interaction),ko04640(Hematopoietic cell lineage),ko04810(Regulation of actin cytoskeleton),ko05410(Hypertrophic cardiomyopathy (HCM)),ko05412(Arrhythmogenic right ventricular cardiomyopathy (ARVC)),ko05414(Dilated cardiomyopathy)
NM_000212	hsa	3690	ITGB3	integrin, beta 3 (platelet glycoprotein IIIa, antigen CD61)	miR-4455	1	1	2	GO:0004872(receptor activity),GO:0005178(integrin binding),GO:0005886(plasma membrane),GO:0007044(cell-substrate junction assembly),GO:0007155(cell adhesion),GO:0007160(cell-matrix adhesion),GO:0007229(integrin-mediated signaling pathway),GO:0007596(blood coagulation),GO:0008305(integrin complex),GO:0009897(external side of plasma membrane),GO:0010745(negative regulation of macrophage derived foa…	ko04510(Focal adhesion),ko04512(ECM-receptor interaction),ko04640(Hematopoietic cell lineage),ko04810(Regulation of actin cytoskeleton),ko05410(Hypertrophic cardiomyopathy (HCM)),ko05412(Arrhythmogenic right ventricular cardiomyopathy (ARVC)),ko05414(Dilated cardiomyopathy)
NM_000212	hsa	3690	ITGB3	integrin, beta 3 (platelet glycoprotein IIIa, antigen CD61)	miR-4530	1	1	2	GO:0004872(receptor activity),GO:0005178(integrin binding),GO:0005886(plasma membrane),GO:0007044(cell-substrate junction assembly),GO:0007155(cell adhesion),GO:0007160(cell-matrix adhesion),GO:0007229(integrin-mediated signaling pathway),GO:0007596(blood coagulation),GO:0008305(integrin complex),GO:0009897(external side of plasma membrane),GO:0010745(negative regulation of macrophage derived foa…	ko04510(Focal adhesion),ko04512(ECM-receptor interaction),ko04640(Hematopoietic cell lineage),ko04810(Regulation of actin cytoskeleton),ko05410(Hypertrophic cardiomyopathy (HCM)),ko05412(Arrhythmogenic right ventricular cardiomyopathy (ARVC)),ko05414(Dilated cardiomyopathy)
NM_000213	hsa	3691	ITGB4	integrin, beta 4	miR-4497	1	1	2	GO:0004872(receptor activity),GO:0005515(protein binding),GO:0005886(plasma membrane),GO:0007154(cell communication),GO:0007155(cell adhesion),GO:0007160(cell-matrix adhesion),GO:0007229(integrin-mediated signaling pathway),GO:0008305(integrin complex),GO:0009925(basal plasma membrane),GO:0016021(integral to membrane),GO:0031581(hemidesmosome assembly),GO:0046847(filopodium assembly)	ko04510(Focal adhesion),ko04512(ECM-receptor interaction),ko04810(Regulation of actin cytoskeleton),ko05410(Hypertrophic cardiomyopathy (HCM)),ko05412(Arrhythmogenic right ventricular cardiomyopathy (ARVC)),ko05414(Dilated cardiomyopathy)
NM_000213	hsa	3691	ITGB4	integrin, beta 4	miR-4534	1	1	2	GO:0004872(receptor activity),GO:0005515(protein binding),GO:0005886(plasma membrane),GO:0007154(cell communication),GO:0007155(cell adhesion),GO:0007160(cell-matrix adhesion),GO:0007229(integrin-mediated signaling pathway),GO:0008305(integrin complex),GO:0009925(basal plasma membrane),GO:0016021(integral to membrane),GO:0031581(hemidesmosome assembly),GO:0046847(filopodium assembly)	ko04510(Focal adhesion),ko04512(ECM-receptor interaction),ko04810(Regulation of actin cytoskeleton),ko05410(Hypertrophic cardiomyopathy (HCM)),ko05412(Arrhythmogenic right ventricular cardiomyopathy (ARVC)),ko05414(Dilated cardiomyopathy)
NM_000214	hsa	182	JAG1	jagged 1 (Alagille syndrome)	miR-4277	1	1	2	GO:0001525(angiogenesis),GO:0001709(cell fate determination),GO:0002011(morphogenesis of an epithelial sheet),GO:0005112(Notch binding),GO:0005198(structural molecule activity),GO:0005509(calcium ion binding),GO:0005515(protein binding),GO:0005576(extracellular region),GO:0005886(plasma membrane),GO:0005887(integral to plasma membrane),GO:0007154(cell communication),GO:0007275(multicellular organ…	ko04330(Notch signaling pathway)
NM_000215	hsa	3718	JAK3	Janus kinase 3	miR-3665	1	1	2	GO:0000166(nucleotide binding),GO:0004715(non-membrane spanning protein tyrosine kinase activity),GO:0004718(Janus kinase activity),GO:0005515(protein binding),GO:0005524(ATP binding),GO:0005856(cytoskeleton),GO:0007243(protein kinase cascade),GO:0016020(membrane),GO:0016740(transferase activity),GO:0018108(peptidyl-tyrosine phosphorylation),GO:0019898(extrinsic to membrane)	ko04062(Chemokine signaling pathway),ko04630(Jak-STAT signaling pathway),ko05340(Primary immunodeficiency)
NM_000215	hsa	3718	JAK3	Janus kinase 3	miR-4455	1	1	2	GO:0000166(nucleotide binding),GO:0004715(non-membrane spanning protein tyrosine kinase activity),GO:0004718(Janus kinase activity),GO:0005515(protein binding),GO:0005524(ATP binding),GO:0005856(cytoskeleton),GO:0007243(protein kinase cascade),GO:0016020(membrane),GO:0016740(transferase activity),GO:0018108(peptidyl-tyrosine phosphorylation),GO:0019898(extrinsic to membrane)	ko04062(Chemokine signaling pathway),ko04630(Jak-STAT signaling pathway),ko05340(Primary immunodeficiency)
NM_000216	hsa	3730	KAL1	Kallmann syndrome 1 sequence	miR-23c	1	1	2	GO:0004867(serine-type endopeptidase inhibitor activity),GO:0005201(extracellular matrix structural constituent),GO:0005515(protein binding),GO:0005576(extracellular region),GO:0005578(proteinaceous extracellular matrix),GO:0005615(extracellular space),GO:0006935(chemotaxis),GO:0007155(cell adhesion),GO:0007411(axon guidance),GO:0009986(cell surface),GO:0030414(peptidase inhibitor activity)
NM_000216	hsa	3730	KAL1	Kallmann syndrome 1 sequence	miR-320a	1	1	2	GO:0004867(serine-type endopeptidase inhibitor activity),GO:0005201(extracellular matrix structural constituent),GO:0005515(protein binding),GO:0005576(extracellular region),GO:0005578(proteinaceous extracellular matrix),GO:0005615(extracellular space),GO:0006935(chemotaxis),GO:0007155(cell adhesion),GO:0007411(axon guidance),GO:0009986(cell surface),GO:0030414(peptidase inhibitor activity)
NM_000216	hsa	3730	KAL1	Kallmann syndrome 1 sequence	miR-320b	1	1	2	GO:0004867(serine-type endopeptidase inhibitor activity),GO:0005201(extracellular matrix structural constituent),GO:0005515(protein binding),GO:0005576(extracellular region),GO:0005578(proteinaceous extracellular matrix),GO:0005615(extracellular space),GO:0006935(chemotaxis),GO:0007155(cell adhesion),GO:0007411(axon guidance),GO:0009986(cell surface),GO:0030414(peptidase inhibitor activity)
NM_000216	hsa	3730	KAL1	Kallmann syndrome 1 sequence	miR-320c	1	1	2	GO:0004867(serine-type endopeptidase inhibitor activity),GO:0005201(extracellular matrix structural constituent),GO:0005515(protein binding),GO:0005576(extracellular region),GO:0005578(proteinaceous extracellular matrix),GO:0005615(extracellular space),GO:0006935(chemotaxis),GO:0007155(cell adhesion),GO:0007411(axon guidance),GO:0009986(cell surface),GO:0030414(peptidase inhibitor activity)
NM_000217	hsa	3736	KCNA1	potassium voltage-gated channel, shaker-related subfamily, member 1 (episodic ataxia with myokymia)	miR-181d	1	1	2	GO:0005244(voltage-gated ion channel activity),GO:0005251(delayed rectifier potassium channel activity),GO:0005515(protein binding),GO:0006811(ion transport),GO:0006813(potassium ion transport),GO:0007268(synaptic transmission),GO:0008076(voltage-gated potassium channel complex),GO:0015079(potassium ion transmembrane transporter activity),GO:0016020(membrane),GO:0016021(integral to membrane),GO:0…
NM_000217	hsa	3736	KCNA1	potassium voltage-gated channel, shaker-related subfamily, member 1 (episodic ataxia with myokymia)	miR-4324	1	1	2	GO:0005244(voltage-gated ion channel activity),GO:0005251(delayed rectifier potassium channel activity),GO:0005515(protein binding),GO:0006811(ion transport),GO:0006813(potassium ion transport),GO:0007268(synaptic transmission),GO:0008076(voltage-gated potassium channel complex),GO:0015079(potassium ion transmembrane transporter activity),GO:0016020(membrane),GO:0016021(integral to membrane),GO:0…
NM_000217	hsa	3736	KCNA1	potassium voltage-gated channel, shaker-related subfamily, member 1 (episodic ataxia with myokymia)	miR-5096	1	1	2	GO:0005244(voltage-gated ion channel activity),GO:0005251(delayed rectifier potassium channel activity),GO:0005515(protein binding),GO:0006811(ion transport),GO:0006813(potassium ion transport),GO:0007268(synaptic transmission),GO:0008076(voltage-gated potassium channel complex),GO:0015079(potassium ion transmembrane transporter activity),GO:0016020(membrane),GO:0016021(integral to membrane),GO:0…
NM_000218	hsa	3784	KCNQ1	potassium voltage-gated channel, KQT-like subfamily, member 1	miR-4324	1	1	2	GO:0005244(voltage-gated ion channel activity),GO:0005251(delayed rectifier potassium channel activity),GO:0005515(protein binding),GO:0006349(genetic imprinting),GO:0006811(ion transport),GO:0006813(potassium ion transport),GO:0006936(muscle contraction),GO:0007605(sensory perception of sound),GO:0008015(blood circulation),GO:0008016(regulation of heart contraction),GO:0008076(voltage-gated pota…	ko05110(Vibrio cholerae infection)
NM_000218	hsa	3784	KCNQ1	potassium voltage-gated channel, KQT-like subfamily, member 1	miR-4443	1	1	2	GO:0005244(voltage-gated ion channel activity),GO:0005251(delayed rectifier potassium channel activity),GO:0005515(protein binding),GO:0006349(genetic imprinting),GO:0006811(ion transport),GO:0006813(potassium ion transport),GO:0006936(muscle contraction),GO:0007605(sensory perception of sound),GO:0008015(blood circulation),GO:0008016(regulation of heart contraction),GO:0008076(voltage-gated pota…	ko05110(Vibrio cholerae infection)
NM_000219	hsa	3753	KCNE1	potassium voltage-gated channel, Isk-related family, member 1	miR-4443	1	1	2	GO:0002070(epithelial cell maturation),GO:0005244(voltage-gated ion channel activity),GO:0005251(delayed rectifier potassium channel activity),GO:0005764(lysosome),GO:0005886(plasma membrane),GO:0006811(ion transport),GO:0006813(potassium ion transport),GO:0006936(muscle contraction),GO:0007605(sensory perception of sound),GO:0008015(blood circulation),GO:0008016(regulation of heart contraction),…
NM_000219	hsa	3753	KCNE1	potassium voltage-gated channel, Isk-related family, member 1	miR-4734	1	1	2	GO:0002070(epithelial cell maturation),GO:0005244(voltage-gated ion channel activity),GO:0005251(delayed rectifier potassium channel activity),GO:0005764(lysosome),GO:0005886(plasma membrane),GO:0006811(ion transport),GO:0006813(potassium ion transport),GO:0006936(muscle contraction),GO:0007605(sensory perception of sound),GO:0008015(blood circulation),GO:0008016(regulation of heart contraction),…
NM_000220	hsa	3758	KCNJ1	potassium inwardly-rectifying channel, subfamily J, member 1	miR-3665	1	1	2	GO:0000166(nucleotide binding),GO:0005242(inward rectifier potassium channel activity),GO:0005244(voltage-gated ion channel activity),GO:0005515(protein binding),GO:0005524(ATP binding),GO:0006811(ion transport),GO:0006813(potassium ion transport),GO:0007588(excretion),GO:0008076(voltage-gated potassium channel complex),GO:0016020(membrane),GO:0016021(integral to membrane),GO:0030955(potassium io…
NM_000221	hsa	3795	KHK	ketohexokinase (fructokinase)	miR-4455	1	1	2	GO:0000166(nucleotide binding),GO:0004454(ketohexokinase activity),GO:0005515(protein binding),GO:0005524(ATP binding),GO:0005737(cytoplasm),GO:0005975(carbohydrate metabolic process),GO:0006000(fructose metabolic process),GO:0009744(response to sucrose stimulus),GO:0009749(response to glucose stimulus),GO:0009750(response to fructose stimulus),GO:0010043(response to zinc ion),GO:0016301(kinase a…	ko00051(Fructose and mannose metabolism),ko01100(Metabolic pathways)
NM_000221	hsa	3795	KHK	ketohexokinase (fructokinase)	miR-720	1	1	2	GO:0000166(nucleotide binding),GO:0004454(ketohexokinase activity),GO:0005515(protein binding),GO:0005524(ATP binding),GO:0005737(cytoplasm),GO:0005975(carbohydrate metabolic process),GO:0006000(fructose metabolic process),GO:0009744(response to sucrose stimulus),GO:0009749(response to glucose stimulus),GO:0009750(response to fructose stimulus),GO:0010043(response to zinc ion),GO:0016301(kinase a…	ko00051(Fructose and mannose metabolism),ko01100(Metabolic pathways)
NM_000222	hsa	3815	KIT	v-kit Hardy-Zuckerman 4 feline sarcoma viral oncogene homolog	miR-3591-3p	1	1	2	GO:0000166(nucleotide binding),GO:0001669(acrosomal vesicle),GO:0002318(myeloid progenitor cell differentiation),GO:0002320(lymphoid progenitor cell differentiation),GO:0002573(myeloid leukocyte differentiation),GO:0004716(receptor signaling protein tyrosine kinase activity),GO:0004872(receptor activity),GO:0005020(stem cell factor receptor activity),GO:0005515(protein binding),GO:0005524(ATP bin…	ko04060(Cytokine-cytokine receptor interaction),ko04144(Endocytosis),ko04640(Hematopoietic cell lineage),ko04916(Melanogenesis),ko05200(Pathways in cancer),ko05221(Acute myeloid leukemia)
NM_000222	hsa	3815	KIT	v-kit Hardy-Zuckerman 4 feline sarcoma viral oncogene homolog	miR-3665	1	1	2	GO:0000166(nucleotide binding),GO:0001669(acrosomal vesicle),GO:0002318(myeloid progenitor cell differentiation),GO:0002320(lymphoid progenitor cell differentiation),GO:0002573(myeloid leukocyte differentiation),GO:0004716(receptor signaling protein tyrosine kinase activity),GO:0004872(receptor activity),GO:0005020(stem cell factor receptor activity),GO:0005515(protein binding),GO:0005524(ATP bin…	ko04060(Cytokine-cytokine receptor interaction),ko04144(Endocytosis),ko04640(Hematopoietic cell lineage),ko04916(Melanogenesis),ko05200(Pathways in cancer),ko05221(Acute myeloid leukemia)
NM_000222	hsa	3815	KIT	v-kit Hardy-Zuckerman 4 feline sarcoma viral oncogene homolog	miR-4277	1	1	2	GO:0000166(nucleotide binding),GO:0001669(acrosomal vesicle),GO:0002318(myeloid progenitor cell differentiation),GO:0002320(lymphoid progenitor cell differentiation),GO:0002573(myeloid leukocyte differentiation),GO:0004716(receptor signaling protein tyrosine kinase activity),GO:0004872(receptor activity),GO:0005020(stem cell factor receptor activity),GO:0005515(protein binding),GO:0005524(ATP bin…	ko04060(Cytokine-cytokine receptor interaction),ko04144(Endocytosis),ko04640(Hematopoietic cell lineage),ko04916(Melanogenesis),ko05200(Pathways in cancer),ko05221(Acute myeloid leukemia)
NM_000223	hsa	3859	KRT12	keratin 12	miR-23c	1	1	2	GO:0005198(structural molecule activity),GO:0005882(intermediate filament),GO:0007601(visual perception)
NM_000226	hsa	3857	KRT9	keratin 9	miR-4455	1	1	2	GO:0005200(structural constituent of cytoskeleton),GO:0005515(protein binding),GO:0005737(cytoplasm),GO:0005856(cytoskeleton),GO:0007283(spermatogenesis),GO:0043588(skin development),GO:0045095(keratin filament),GO:0045109(intermediate filament organization),GO:0048471(perinuclear region of cytoplasm)
NM_000228	hsa	3914	LAMB3	laminin, beta 3	miR-4484	1	1	2	GO:0005198(structural molecule activity),GO:0005576(extracellular region),GO:0005604(basement membrane),GO:0007155(cell adhesion),GO:0008544(epidermis development),GO:0031581(hemidesmosome assembly),GO:0032403(protein complex binding),GO:0050873(brown fat cell differentiation)	ko04510(Focal adhesion),ko04512(ECM-receptor interaction),ko05200(Pathways in cancer),ko05222(Small cell lung cancer)
NM_000230	hsa	3952	LEP	leptin	miR-1260b	1	1	2	GO:0001542(ovulation from ovarian follicle),GO:0002021(response to dietary excess),GO:0005179(hormone activity),GO:0005515(protein binding),GO:0005576(extracellular region),GO:0005615(extracellular space),GO:0006006(glucose metabolic process),GO:0006111(regulation of gluconeogenesis),GO:0006112(energy reserve metabolic process),GO:0006629(lipid metabolic process),GO:0007242(intracellular signalin…	ko04060(Cytokine-cytokine receptor interaction),ko04080(Neuroactive ligand-receptor interaction),ko04630(Jak-STAT signaling pathway),ko04920(Adipocytokine signaling pathway)
NM_000230	hsa	3952	LEP	leptin	miR-30b	1	1	2	GO:0001542(ovulation from ovarian follicle),GO:0002021(response to dietary excess),GO:0005179(hormone activity),GO:0005515(protein binding),GO:0005576(extracellular region),GO:0005615(extracellular space),GO:0006006(glucose metabolic process),GO:0006111(regulation of gluconeogenesis),GO:0006112(energy reserve metabolic process),GO:0006629(lipid metabolic process),GO:0007242(intracellular signalin…	ko04060(Cytokine-cytokine receptor interaction),ko04080(Neuroactive ligand-receptor interaction),ko04630(Jak-STAT signaling pathway),ko04920(Adipocytokine signaling pathway)
NM_000230	hsa	3952	LEP	leptin	miR-3591-3p	1	1	2	GO:0001542(ovulation from ovarian follicle),GO:0002021(response to dietary excess),GO:0005179(hormone activity),GO:0005515(protein binding),GO:0005576(extracellular region),GO:0005615(extracellular space),GO:0006006(glucose metabolic process),GO:0006111(regulation of gluconeogenesis),GO:0006112(energy reserve metabolic process),GO:0006629(lipid metabolic process),GO:0007242(intracellular signalin…	ko04060(Cytokine-cytokine receptor interaction),ko04080(Neuroactive ligand-receptor interaction),ko04630(Jak-STAT signaling pathway),ko04920(Adipocytokine signaling pathway)
NM_000230	hsa	3952	LEP	leptin	miR-4687-3p	1	1	2	GO:0001542(ovulation from ovarian follicle),GO:0002021(response to dietary excess),GO:0005179(hormone activity),GO:0005515(protein binding),GO:0005576(extracellular region),GO:0005615(extracellular space),GO:0006006(glucose metabolic process),GO:0006111(regulation of gluconeogenesis),GO:0006112(energy reserve metabolic process),GO:0006629(lipid metabolic process),GO:0007242(intracellular signalin…	ko04060(Cytokine-cytokine receptor interaction),ko04080(Neuroactive ligand-receptor interaction),ko04630(Jak-STAT signaling pathway),ko04920(Adipocytokine signaling pathway)
NM_000230	hsa	3952	LEP	leptin	miR-5096	1	1	2	GO:0001542(ovulation from ovarian follicle),GO:0002021(response to dietary excess),GO:0005179(hormone activity),GO:0005515(protein binding),GO:0005576(extracellular region),GO:0005615(extracellular space),GO:0006006(glucose metabolic process),GO:0006111(regulation of gluconeogenesis),GO:0006112(energy reserve metabolic process),GO:0006629(lipid metabolic process),GO:0007242(intracellular signalin…	ko04060(Cytokine-cytokine receptor interaction),ko04080(Neuroactive ligand-receptor interaction),ko04630(Jak-STAT signaling pathway),ko04920(Adipocytokine signaling pathway)
NM_000230	hsa	3952	LEP	leptin	miR-720	1	1	2	GO:0001542(ovulation from ovarian follicle),GO:0002021(response to dietary excess),GO:0005179(hormone activity),GO:0005515(protein binding),GO:0005576(extracellular region),GO:0005615(extracellular space),GO:0006006(glucose metabolic process),GO:0006111(regulation of gluconeogenesis),GO:0006112(energy reserve metabolic process),GO:0006629(lipid metabolic process),GO:0007242(intracellular signalin…	ko04060(Cytokine-cytokine receptor interaction),ko04080(Neuroactive ligand-receptor interaction),ko04630(Jak-STAT signaling pathway),ko04920(Adipocytokine signaling pathway)
NM_000231	hsa	6445	SGCG	sarcoglycan, gamma (35kDa dystrophin-associated glycoprotein)	miR-4455	1	1	2	GO:0005515(protein binding),GO:0005737(cytoplasm),GO:0005856(cytoskeleton),GO:0005886(plasma membrane),GO:0007010(cytoskeleton organization),GO:0007517(muscle organ development),GO:0016012(sarcoglycan complex),GO:0016021(integral to membrane)	ko05410(Hypertrophic cardiomyopathy (HCM)),ko05412(Arrhythmogenic right ventricular cardiomyopathy (ARVC)),ko05414(Dilated cardiomyopathy),ko05416(Viral myocarditis)
NM_000232	hsa	6443	SGCB	sarcoglycan, beta (43kDa dystrophin-associated glycoprotein)	miR-19b	1	1	2	GO:0005737(cytoplasm),GO:0005856(cytoskeleton),GO:0005886(plasma membrane),GO:0005887(integral to plasma membrane),GO:0007010(cytoskeleton organization),GO:0007517(muscle organ development),GO:0016012(sarcoglycan complex)	ko05410(Hypertrophic cardiomyopathy (HCM)),ko05412(Arrhythmogenic right ventricular cardiomyopathy (ARVC)),ko05414(Dilated cardiomyopathy),ko05416(Viral myocarditis)
NM_000232	hsa	6443	SGCB	sarcoglycan, beta (43kDa dystrophin-associated glycoprotein)	miR-30b	1	1	2	GO:0005737(cytoplasm),GO:0005856(cytoskeleton),GO:0005886(plasma membrane),GO:0005887(integral to plasma membrane),GO:0007010(cytoskeleton organization),GO:0007517(muscle organ development),GO:0016012(sarcoglycan complex)	ko05410(Hypertrophic cardiomyopathy (HCM)),ko05412(Arrhythmogenic right ventricular cardiomyopathy (ARVC)),ko05414(Dilated cardiomyopathy),ko05416(Viral myocarditis)
NM_000232	hsa	6443	SGCB	sarcoglycan, beta (43kDa dystrophin-associated glycoprotein)	miR-320a	1	1	2	GO:0005737(cytoplasm),GO:0005856(cytoskeleton),GO:0005886(plasma membrane),GO:0005887(integral to plasma membrane),GO:0007010(cytoskeleton organization),GO:0007517(muscle organ development),GO:0016012(sarcoglycan complex)	ko05410(Hypertrophic cardiomyopathy (HCM)),ko05412(Arrhythmogenic right ventricular cardiomyopathy (ARVC)),ko05414(Dilated cardiomyopathy),ko05416(Viral myocarditis)
NM_000232	hsa	6443	SGCB	sarcoglycan, beta (43kDa dystrophin-associated glycoprotein)	miR-320b	1	1	2	GO:0005737(cytoplasm),GO:0005856(cytoskeleton),GO:0005886(plasma membrane),GO:0005887(integral to plasma membrane),GO:0007010(cytoskeleton organization),GO:0007517(muscle organ development),GO:0016012(sarcoglycan complex)	ko05410(Hypertrophic cardiomyopathy (HCM)),ko05412(Arrhythmogenic right ventricular cardiomyopathy (ARVC)),ko05414(Dilated cardiomyopathy),ko05416(Viral myocarditis)
NM_000232	hsa	6443	SGCB	sarcoglycan, beta (43kDa dystrophin-associated glycoprotein)	miR-320c	1	1	2	GO:0005737(cytoplasm),GO:0005856(cytoskeleton),GO:0005886(plasma membrane),GO:0005887(integral to plasma membrane),GO:0007010(cytoskeleton organization),GO:0007517(muscle organ development),GO:0016012(sarcoglycan complex)	ko05410(Hypertrophic cardiomyopathy (HCM)),ko05412(Arrhythmogenic right ventricular cardiomyopathy (ARVC)),ko05414(Dilated cardiomyopathy),ko05416(Viral myocarditis)
NM_000232	hsa	6443	SGCB	sarcoglycan, beta (43kDa dystrophin-associated glycoprotein)	miR-4687-3p	1	1	2	GO:0005737(cytoplasm),GO:0005856(cytoskeleton),GO:0005886(plasma membrane),GO:0005887(integral to plasma membrane),GO:0007010(cytoskeleton organization),GO:0007517(muscle organ development),GO:0016012(sarcoglycan complex)	ko05410(Hypertrophic cardiomyopathy (HCM)),ko05412(Arrhythmogenic right ventricular cardiomyopathy (ARVC)),ko05414(Dilated cardiomyopathy),ko05416(Viral myocarditis)
NM_000232	hsa	6443	SGCB	sarcoglycan, beta (43kDa dystrophin-associated glycoprotein)	miR-5096	1	1	2	GO:0005737(cytoplasm),GO:0005856(cytoskeleton),GO:0005886(plasma membrane),GO:0005887(integral to plasma membrane),GO:0007010(cytoskeleton organization),GO:0007517(muscle organ development),GO:0016012(sarcoglycan complex)	ko05410(Hypertrophic cardiomyopathy (HCM)),ko05412(Arrhythmogenic right ventricular cardiomyopathy (ARVC)),ko05414(Dilated cardiomyopathy),ko05416(Viral myocarditis)
NM_000235	hsa	3988	LIPA	lipase A, lysosomal acid, cholesterol esterase	miR-3665	1	1	2	GO:0000902(cell morphogenesis),GO:0001816(cytokine production),GO:0004771(sterol esterase activity),GO:0005764(lysosome),GO:0006487(protein amino acid N-linked glycosylation),GO:0006631(fatty acid metabolic process),GO:0006954(inflammatory response),GO:0008283(cell proliferation),GO:0016042(lipid catabolic process),GO:0016125(sterol metabolic process),GO:0016298(lipase activity),GO:0016787(hydrol…	ko00100(Steroid biosynthesis),ko04142(Lysosome)
NM_000237	hsa	4023	LPL	lipoprotein lipase	miR-320a	1	1	2	GO:0004465(lipoprotein lipase activity),GO:0004620(phospholipase activity),GO:0004806(triglyceride lipase activity),GO:0005102(receptor binding),GO:0005576(extracellular region),GO:0005615(extracellular space),GO:0005886(plasma membrane),GO:0006633(fatty acid biosynthetic process),GO:0006644(phospholipid metabolic process),GO:0008201(heparin binding),GO:0010744(positive regulation of macrophage d…	ko00561(Glycerolipid metabolism),ko03320(PPAR signaling pathway),ko05010(Alzheimer's disease)
NM_000237	hsa	4023	LPL	lipoprotein lipase	miR-320b	1	1	2	GO:0004465(lipoprotein lipase activity),GO:0004620(phospholipase activity),GO:0004806(triglyceride lipase activity),GO:0005102(receptor binding),GO:0005576(extracellular region),GO:0005615(extracellular space),GO:0005886(plasma membrane),GO:0006633(fatty acid biosynthetic process),GO:0006644(phospholipid metabolic process),GO:0008201(heparin binding),GO:0010744(positive regulation of macrophage d…	ko00561(Glycerolipid metabolism),ko03320(PPAR signaling pathway),ko05010(Alzheimer's disease)
NM_000237	hsa	4023	LPL	lipoprotein lipase	miR-320c	1	1	2	GO:0004465(lipoprotein lipase activity),GO:0004620(phospholipase activity),GO:0004806(triglyceride lipase activity),GO:0005102(receptor binding),GO:0005576(extracellular region),GO:0005615(extracellular space),GO:0005886(plasma membrane),GO:0006633(fatty acid biosynthetic process),GO:0006644(phospholipid metabolic process),GO:0008201(heparin binding),GO:0010744(positive regulation of macrophage d…	ko00561(Glycerolipid metabolism),ko03320(PPAR signaling pathway),ko05010(Alzheimer's disease)
NM_000239	hsa	4069	LYZ	lysozyme (renal amyloidosis)	miR-23c	1	1	2	GO:0003796(lysozyme activity),GO:0005515(protein binding),GO:0005615(extracellular space),GO:0006954(inflammatory response),GO:0008152(metabolic process),GO:0016798(hydrolase activity, acting on glycosyl bonds),GO:0016998(cell wall macromolecule catabolic process),GO:0019835(cytolysis),GO:0042742(defense response to bacterium)
NM_000239	hsa	4069	LYZ	lysozyme (renal amyloidosis)	miR-5096	1	1	2	GO:0003796(lysozyme activity),GO:0005515(protein binding),GO:0005615(extracellular space),GO:0006954(inflammatory response),GO:0008152(metabolic process),GO:0016798(hydrolase activity, acting on glycosyl bonds),GO:0016998(cell wall macromolecule catabolic process),GO:0019835(cytolysis),GO:0042742(defense response to bacterium)
NM_000240	hsa	4128	MAOA	monoamine oxidase A	miR-181d	1	1	2	GO:0005515(protein binding),GO:0005739(mitochondrion),GO:0005741(mitochondrial outer membrane),GO:0006584(catecholamine metabolic process),GO:0007610(behavior),GO:0008131(amine oxidase activity),GO:0016020(membrane),GO:0016021(integral to membrane),GO:0016491(oxidoreductase activity),GO:0042135(neurotransmitter catabolic process),GO:0042420(dopamine catabolic process),GO:0055114(oxidation reducti…	ko00260(Glycine,ko serine and threonine metabolism),ko00330(Arginine and proline metabolism),ko00340(Histidine metabolism),ko00350(Tyrosine metabolism),ko00360(Phenylalanine metabolism),ko00380(Tryptophan metabolism),ko00982(Drug metabolism - cytochrome P450),ko01100(Metabolic pathways)
NM_000240	hsa	4128	MAOA	monoamine oxidase A	miR-4443	1	1	2	GO:0005515(protein binding),GO:0005739(mitochondrion),GO:0005741(mitochondrial outer membrane),GO:0006584(catecholamine metabolic process),GO:0007610(behavior),GO:0008131(amine oxidase activity),GO:0016020(membrane),GO:0016021(integral to membrane),GO:0016491(oxidoreductase activity),GO:0042135(neurotransmitter catabolic process),GO:0042420(dopamine catabolic process),GO:0055114(oxidation reducti…	ko00260(Glycine,ko serine and threonine metabolism),ko00330(Arginine and proline metabolism),ko00340(Histidine metabolism),ko00350(Tyrosine metabolism),ko00360(Phenylalanine metabolism),ko00380(Tryptophan metabolism),ko00982(Drug metabolism - cytochrome P450),ko01100(Metabolic pathways)
NM_000240	hsa	4128	MAOA	monoamine oxidase A	miR-4534	1	1	2	GO:0005515(protein binding),GO:0005739(mitochondrion),GO:0005741(mitochondrial outer membrane),GO:0006584(catecholamine metabolic process),GO:0007610(behavior),GO:0008131(amine oxidase activity),GO:0016020(membrane),GO:0016021(integral to membrane),GO:0016491(oxidoreductase activity),GO:0042135(neurotransmitter catabolic process),GO:0042420(dopamine catabolic process),GO:0055114(oxidation reducti…	ko00260(Glycine,ko serine and threonine metabolism),ko00330(Arginine and proline metabolism),ko00340(Histidine metabolism),ko00350(Tyrosine metabolism),ko00360(Phenylalanine metabolism),ko00380(Tryptophan metabolism),ko00982(Drug metabolism - cytochrome P450),ko01100(Metabolic pathways)
NM_000242	hsa	4153	MBL2	mannose-binding lectin (protein C) 2, soluble (opsonic defect)	miR-23c	1	1	2	GO:0001867(complement activation, lectin pathway),GO:0005102(receptor binding),GO:0005509(calcium ion binding),GO:0005529(sugar binding),GO:0005537(mannose binding),GO:0005576(extracellular region),GO:0005615(extracellular space),GO:0006953(acute-phase response),GO:0006958(complement activation, classical pathway),GO:0006979(response to oxidative stress),GO:0008228(opsonization),GO:0043499(eukary…	ko04610(Complement and coagulation cascades)
NM_000242	hsa	4153	MBL2	mannose-binding lectin (protein C) 2, soluble (opsonic defect)	miR-30b	1	1	2	GO:0001867(complement activation, lectin pathway),GO:0005102(receptor binding),GO:0005509(calcium ion binding),GO:0005529(sugar binding),GO:0005537(mannose binding),GO:0005576(extracellular region),GO:0005615(extracellular space),GO:0006953(acute-phase response),GO:0006958(complement activation, classical pathway),GO:0006979(response to oxidative stress),GO:0008228(opsonization),GO:0043499(eukary…	ko04610(Complement and coagulation cascades)
NM_000242	hsa	4153	MBL2	mannose-binding lectin (protein C) 2, soluble (opsonic defect)	miR-320a	1	1	2	GO:0001867(complement activation, lectin pathway),GO:0005102(receptor binding),GO:0005509(calcium ion binding),GO:0005529(sugar binding),GO:0005537(mannose binding),GO:0005576(extracellular region),GO:0005615(extracellular space),GO:0006953(acute-phase response),GO:0006958(complement activation, classical pathway),GO:0006979(response to oxidative stress),GO:0008228(opsonization),GO:0043499(eukary…	ko04610(Complement and coagulation cascades)
NM_000242	hsa	4153	MBL2	mannose-binding lectin (protein C) 2, soluble (opsonic defect)	miR-320b	1	1	2	GO:0001867(complement activation, lectin pathway),GO:0005102(receptor binding),GO:0005509(calcium ion binding),GO:0005529(sugar binding),GO:0005537(mannose binding),GO:0005576(extracellular region),GO:0005615(extracellular space),GO:0006953(acute-phase response),GO:0006958(complement activation, classical pathway),GO:0006979(response to oxidative stress),GO:0008228(opsonization),GO:0043499(eukary…	ko04610(Complement and coagulation cascades)
NM_000242	hsa	4153	MBL2	mannose-binding lectin (protein C) 2, soluble (opsonic defect)	miR-320c	1	1	2	GO:0001867(complement activation, lectin pathway),GO:0005102(receptor binding),GO:0005509(calcium ion binding),GO:0005529(sugar binding),GO:0005537(mannose binding),GO:0005576(extracellular region),GO:0005615(extracellular space),GO:0006953(acute-phase response),GO:0006958(complement activation, classical pathway),GO:0006979(response to oxidative stress),GO:0008228(opsonization),GO:0043499(eukary…	ko04610(Complement and coagulation cascades)
NM_000243	hsa	4210	MEFV	Mediterranean fever	miR-4324	1	1	2	GO:0003779(actin binding),GO:0005515(protein binding),GO:0005622(intracellular),GO:0005634(nucleus),GO:0005737(cytoplasm),GO:0005856(cytoskeleton),GO:0005874(microtubule),GO:0005875(microtubule associated complex),GO:0006954(inflammatory response),GO:0008270(zinc ion binding),GO:0046872(metal ion binding)	ko04621(NOD-like receptor signaling pathway)
NM_000244	hsa	4221	MEN1	multiple endocrine neoplasia I	miR-4497	1	1	2	GO:0000122(negative regulation of transcription from RNA polymerase II promoter),GO:0000165(MAPKKK cascade),GO:0000400(four-way junction DNA binding),GO:0000403(Y-form DNA binding),GO:0000785(chromatin),GO:0001503(ossification),GO:0001776(leukocyte homeostasis),GO:0001933(negative regulation of protein amino acid phosphorylation),GO:0002051(osteoblast fate commitment),GO:0002076(osteoblast develo…
NM_000245	hsa	4233	MET	met proto-oncogene (hepatocyte growth factor receptor)	miR-181d	1	1	2	GO:0000166(nucleotide binding),GO:0004872(receptor activity),GO:0005008(hepatocyte growth factor receptor activity),GO:0005515(protein binding),GO:0005524(ATP binding),GO:0005886(plasma membrane),GO:0005887(integral to plasma membrane),GO:0006468(protein amino acid phosphorylation),GO:0007166(cell surface receptor linked signal transduction),GO:0007275(multicellular organismal development),GO:000…	ko04060(Cytokine-cytokine receptor interaction),ko04144(Endocytosis),ko04360(Axon guidance),ko04510(Focal adhesion),ko04520(Adherens junction),ko05120(Epithelial cell signaling in Helicobacter pylori infection),ko05200(Pathways in cancer),ko05210(Colorectal cancer),ko05211(Renal cell carcinoma),ko05218(Melanoma)
NM_000245	hsa	4233	MET	met proto-oncogene (hepatocyte growth factor receptor)	miR-23c	1	1	2	GO:0000166(nucleotide binding),GO:0004872(receptor activity),GO:0005008(hepatocyte growth factor receptor activity),GO:0005515(protein binding),GO:0005524(ATP binding),GO:0005886(plasma membrane),GO:0005887(integral to plasma membrane),GO:0006468(protein amino acid phosphorylation),GO:0007166(cell surface receptor linked signal transduction),GO:0007275(multicellular organismal development),GO:000…	ko04060(Cytokine-cytokine receptor interaction),ko04144(Endocytosis),ko04360(Axon guidance),ko04510(Focal adhesion),ko04520(Adherens junction),ko05120(Epithelial cell signaling in Helicobacter pylori infection),ko05200(Pathways in cancer),ko05210(Colorectal cancer),ko05211(Renal cell carcinoma),ko05218(Melanoma)
NM_000245	hsa	4233	MET	met proto-oncogene (hepatocyte growth factor receptor)	miR-4277	1	1	2	GO:0000166(nucleotide binding),GO:0004872(receptor activity),GO:0005008(hepatocyte growth factor receptor activity),GO:0005515(protein binding),GO:0005524(ATP binding),GO:0005886(plasma membrane),GO:0005887(integral to plasma membrane),GO:0006468(protein amino acid phosphorylation),GO:0007166(cell surface receptor linked signal transduction),GO:0007275(multicellular organismal development),GO:000…	ko04060(Cytokine-cytokine receptor interaction),ko04144(Endocytosis),ko04360(Axon guidance),ko04510(Focal adhesion),ko04520(Adherens junction),ko05120(Epithelial cell signaling in Helicobacter pylori infection),ko05200(Pathways in cancer),ko05210(Colorectal cancer),ko05211(Renal cell carcinoma),ko05218(Melanoma)
NM_000248	hsa	4286	MITF	microphthalmia-associated transcription factor	miR-103a	1	1	2	GO:0003682(chromatin binding),GO:0003705(RNA polymerase II transcription factor activity, enhancer binding),GO:0005634(nucleus),GO:0007275(multicellular organismal development),GO:0016055(Wnt receptor signaling pathway),GO:0016563(transcription activator activity),GO:0030318(melanocyte differentiation),GO:0042127(regulation of cell proliferation),GO:0043010(camera-type eye development),GO:0043066…	ko04916(Melanogenesis),ko05200(Pathways in cancer),ko05218(Melanoma)
NM_000248	hsa	4286	MITF	microphthalmia-associated transcription factor	miR-107	1	1	2	GO:0003682(chromatin binding),GO:0003705(RNA polymerase II transcription factor activity, enhancer binding),GO:0005634(nucleus),GO:0007275(multicellular organismal development),GO:0016055(Wnt receptor signaling pathway),GO:0016563(transcription activator activity),GO:0030318(melanocyte differentiation),GO:0042127(regulation of cell proliferation),GO:0043010(camera-type eye development),GO:0043066…	ko04916(Melanogenesis),ko05200(Pathways in cancer),ko05218(Melanoma)
NM_000248	hsa	4286	MITF	microphthalmia-associated transcription factor	miR-1246	1	1	2	GO:0003682(chromatin binding),GO:0003705(RNA polymerase II transcription factor activity, enhancer binding),GO:0005634(nucleus),GO:0007275(multicellular organismal development),GO:0016055(Wnt receptor signaling pathway),GO:0016563(transcription activator activity),GO:0030318(melanocyte differentiation),GO:0042127(regulation of cell proliferation),GO:0043010(camera-type eye development),GO:0043066…	ko04916(Melanogenesis),ko05200(Pathways in cancer),ko05218(Melanoma)
NM_000248	hsa	4286	MITF	microphthalmia-associated transcription factor	miR-181d	1	1	2	GO:0003682(chromatin binding),GO:0003705(RNA polymerase II transcription factor activity, enhancer binding),GO:0005634(nucleus),GO:0007275(multicellular organismal development),GO:0016055(Wnt receptor signaling pathway),GO:0016563(transcription activator activity),GO:0030318(melanocyte differentiation),GO:0042127(regulation of cell proliferation),GO:0043010(camera-type eye development),GO:0043066…	ko04916(Melanogenesis),ko05200(Pathways in cancer),ko05218(Melanoma)
NM_000248	hsa	4286	MITF	microphthalmia-associated transcription factor	miR-23c	1	1	2	GO:0003682(chromatin binding),GO:0003705(RNA polymerase II transcription factor activity, enhancer binding),GO:0005634(nucleus),GO:0007275(multicellular organismal development),GO:0016055(Wnt receptor signaling pathway),GO:0016563(transcription activator activity),GO:0030318(melanocyte differentiation),GO:0042127(regulation of cell proliferation),GO:0043010(camera-type eye development),GO:0043066…	ko04916(Melanogenesis),ko05200(Pathways in cancer),ko05218(Melanoma)
NM_000248	hsa	4286	MITF	microphthalmia-associated transcription factor	miR-320b	1	1	2	GO:0003682(chromatin binding),GO:0003705(RNA polymerase II transcription factor activity, enhancer binding),GO:0005634(nucleus),GO:0007275(multicellular organismal development),GO:0016055(Wnt receptor signaling pathway),GO:0016563(transcription activator activity),GO:0030318(melanocyte differentiation),GO:0042127(regulation of cell proliferation),GO:0043010(camera-type eye development),GO:0043066…	ko04916(Melanogenesis),ko05200(Pathways in cancer),ko05218(Melanoma)
NM_000248	hsa	4286	MITF	microphthalmia-associated transcription factor	miR-3665	1	1	2	GO:0003682(chromatin binding),GO:0003705(RNA polymerase II transcription factor activity, enhancer binding),GO:0005634(nucleus),GO:0007275(multicellular organismal development),GO:0016055(Wnt receptor signaling pathway),GO:0016563(transcription activator activity),GO:0030318(melanocyte differentiation),GO:0042127(regulation of cell proliferation),GO:0043010(camera-type eye development),GO:0043066…	ko04916(Melanogenesis),ko05200(Pathways in cancer),ko05218(Melanoma)
NM_000248	hsa	4286	MITF	microphthalmia-associated transcription factor	miR-3935	1	1	2	GO:0003682(chromatin binding),GO:0003705(RNA polymerase II transcription factor activity, enhancer binding),GO:0005634(nucleus),GO:0007275(multicellular organismal development),GO:0016055(Wnt receptor signaling pathway),GO:0016563(transcription activator activity),GO:0030318(melanocyte differentiation),GO:0042127(regulation of cell proliferation),GO:0043010(camera-type eye development),GO:0043066…	ko04916(Melanogenesis),ko05200(Pathways in cancer),ko05218(Melanoma)
NM_000248	hsa	4286	MITF	microphthalmia-associated transcription factor	miR-4277	1	1	2	GO:0003682(chromatin binding),GO:0003705(RNA polymerase II transcription factor activity, enhancer binding),GO:0005634(nucleus),GO:0007275(multicellular organismal development),GO:0016055(Wnt receptor signaling pathway),GO:0016563(transcription activator activity),GO:0030318(melanocyte differentiation),GO:0042127(regulation of cell proliferation),GO:0043010(camera-type eye development),GO:0043066…	ko04916(Melanogenesis),ko05200(Pathways in cancer),ko05218(Melanoma)
NM_000248	hsa	4286	MITF	microphthalmia-associated transcription factor	miR-4443	1	1	2	GO:0003682(chromatin binding),GO:0003705(RNA polymerase II transcription factor activity, enhancer binding),GO:0005634(nucleus),GO:0007275(multicellular organismal development),GO:0016055(Wnt receptor signaling pathway),GO:0016563(transcription activator activity),GO:0030318(melanocyte differentiation),GO:0042127(regulation of cell proliferation),GO:0043010(camera-type eye development),GO:0043066…	ko04916(Melanogenesis),ko05200(Pathways in cancer),ko05218(Melanoma)
NM_000248	hsa	4286	MITF	microphthalmia-associated transcription factor	miR-4687-3p	1	1	2	GO:0003682(chromatin binding),GO:0003705(RNA polymerase II transcription factor activity, enhancer binding),GO:0005634(nucleus),GO:0007275(multicellular organismal development),GO:0016055(Wnt receptor signaling pathway),GO:0016563(transcription activator activity),GO:0030318(melanocyte differentiation),GO:0042127(regulation of cell proliferation),GO:0043010(camera-type eye development),GO:0043066…	ko04916(Melanogenesis),ko05200(Pathways in cancer),ko05218(Melanoma)
NM_000248	hsa	4286	MITF	microphthalmia-associated transcription factor	miR-5096	1	1	2	GO:0003682(chromatin binding),GO:0003705(RNA polymerase II transcription factor activity, enhancer binding),GO:0005634(nucleus),GO:0007275(multicellular organismal development),GO:0016055(Wnt receptor signaling pathway),GO:0016563(transcription activator activity),GO:0030318(melanocyte differentiation),GO:0042127(regulation of cell proliferation),GO:0043010(camera-type eye development),GO:0043066…	ko04916(Melanogenesis),ko05200(Pathways in cancer),ko05218(Melanoma)
NM_000252	hsa	4534	MTM1	myotubularin 1	miR-320a	1	1	2	GO:0004722(protein serine/threonine phosphatase activity),GO:0004725(protein tyrosine phosphatase activity),GO:0005575(cellular_component),GO:0006470(protein amino acid dephosphorylation),GO:0007517(muscle organ development),GO:0016787(hydrolase activity),GO:0046716(muscle homeostasis)
NM_000252	hsa	4534	MTM1	myotubularin 1	miR-320b	1	1	2	GO:0004722(protein serine/threonine phosphatase activity),GO:0004725(protein tyrosine phosphatase activity),GO:0005575(cellular_component),GO:0006470(protein amino acid dephosphorylation),GO:0007517(muscle organ development),GO:0016787(hydrolase activity),GO:0046716(muscle homeostasis)
NM_000252	hsa	4534	MTM1	myotubularin 1	miR-320c	1	1	2	GO:0004722(protein serine/threonine phosphatase activity),GO:0004725(protein tyrosine phosphatase activity),GO:0005575(cellular_component),GO:0006470(protein amino acid dephosphorylation),GO:0007517(muscle organ development),GO:0016787(hydrolase activity),GO:0046716(muscle homeostasis)
NM_000252	hsa	4534	MTM1	myotubularin 1	miR-4443	1	1	2	GO:0004722(protein serine/threonine phosphatase activity),GO:0004725(protein tyrosine phosphatase activity),GO:0005575(cellular_component),GO:0006470(protein amino acid dephosphorylation),GO:0007517(muscle organ development),GO:0016787(hydrolase activity),GO:0046716(muscle homeostasis)
NM_000254	hsa	4548	MTR	5-methyltetrahydrofolate-homocysteine methyltransferase	miR-1260b	1	1	2	GO:0004156(dihydropteroate synthase activity),GO:0005515(protein binding),GO:0005542(folic acid binding),GO:0005622(intracellular),GO:0005625(soluble fraction),GO:0005737(cytoplasm),GO:0005829(cytosol),GO:0006479(protein amino acid methylation),GO:0007399(nervous system development),GO:0008168(methyltransferase activity),GO:0008270(zinc ion binding),GO:0008652(cellular amino acid biosynthetic pro…	ko00270(Cysteine and methionine metabolism),ko00670(One carbon pool by folate),ko01100(Metabolic pathways)
NM_000254	hsa	4548	MTR	5-methyltetrahydrofolate-homocysteine methyltransferase	miR-4277	1	1	2	GO:0004156(dihydropteroate synthase activity),GO:0005515(protein binding),GO:0005542(folic acid binding),GO:0005622(intracellular),GO:0005625(soluble fraction),GO:0005737(cytoplasm),GO:0005829(cytosol),GO:0006479(protein amino acid methylation),GO:0007399(nervous system development),GO:0008168(methyltransferase activity),GO:0008270(zinc ion binding),GO:0008652(cellular amino acid biosynthetic pro…	ko00270(Cysteine and methionine metabolism),ko00670(One carbon pool by folate),ko01100(Metabolic pathways)
NM_000254	hsa	4548	MTR	5-methyltetrahydrofolate-homocysteine methyltransferase	miR-4534	1	1	2	GO:0004156(dihydropteroate synthase activity),GO:0005515(protein binding),GO:0005542(folic acid binding),GO:0005622(intracellular),GO:0005625(soluble fraction),GO:0005737(cytoplasm),GO:0005829(cytosol),GO:0006479(protein amino acid methylation),GO:0007399(nervous system development),GO:0008168(methyltransferase activity),GO:0008270(zinc ion binding),GO:0008652(cellular amino acid biosynthetic pro…	ko00270(Cysteine and methionine metabolism),ko00670(One carbon pool by folate),ko01100(Metabolic pathways)
NM_000255	hsa	4594	MUT	methylmalonyl Coenzyme A mutase	miR-320a	1	1	2	GO:0004494(methylmalonyl-CoA mutase activity),GO:0005739(mitochondrion),GO:0005759(mitochondrial matrix),GO:0008152(metabolic process),GO:0009791(post-embryonic development),GO:0031419(cobalamin binding),GO:0046872(metal ion binding),GO:0050897(cobalt ion binding)	ko00280(Valine,ko leucine and isoleucine degradation),ko00640(Propanoate metabolism),ko01100(Metabolic pathways)
NM_000255	hsa	4594	MUT	methylmalonyl Coenzyme A mutase	miR-320b	1	1	2	GO:0004494(methylmalonyl-CoA mutase activity),GO:0005739(mitochondrion),GO:0005759(mitochondrial matrix),GO:0008152(metabolic process),GO:0009791(post-embryonic development),GO:0031419(cobalamin binding),GO:0046872(metal ion binding),GO:0050897(cobalt ion binding)	ko00280(Valine,ko leucine and isoleucine degradation),ko00640(Propanoate metabolism),ko01100(Metabolic pathways)
NM_000255	hsa	4594	MUT	methylmalonyl Coenzyme A mutase	miR-320c	1	1	2	GO:0004494(methylmalonyl-CoA mutase activity),GO:0005739(mitochondrion),GO:0005759(mitochondrial matrix),GO:0008152(metabolic process),GO:0009791(post-embryonic development),GO:0031419(cobalamin binding),GO:0046872(metal ion binding),GO:0050897(cobalt ion binding)	ko00280(Valine,ko leucine and isoleucine degradation),ko00640(Propanoate metabolism),ko01100(Metabolic pathways)
NM_000259	hsa	4644	MYO5A	myosin VA (heavy chain 12, myoxin)	miR-3665	1	1	2	GO:0000146(microfilament motor activity),GO:0000166(nucleotide binding),GO:0001726(ruffle),GO:0005516(calmodulin binding),GO:0005524(ATP binding),GO:0005737(cytoplasm),GO:0006810(transport),GO:0016459(myosin complex),GO:0030048(actin filament-based movement),GO:0030426(growth cone),GO:0051015(actin filament binding)
NM_000259	hsa	4644	MYO5A	myosin VA (heavy chain 12, myoxin)	miR-4277	1	1	2	GO:0000146(microfilament motor activity),GO:0000166(nucleotide binding),GO:0001726(ruffle),GO:0005516(calmodulin binding),GO:0005524(ATP binding),GO:0005737(cytoplasm),GO:0006810(transport),GO:0016459(myosin complex),GO:0030048(actin filament-based movement),GO:0030426(growth cone),GO:0051015(actin filament binding)
NM_000259	hsa	4644	MYO5A	myosin VA (heavy chain 12, myoxin)	miR-4455	1	1	2	GO:0000146(microfilament motor activity),GO:0000166(nucleotide binding),GO:0001726(ruffle),GO:0005516(calmodulin binding),GO:0005524(ATP binding),GO:0005737(cytoplasm),GO:0006810(transport),GO:0016459(myosin complex),GO:0030048(actin filament-based movement),GO:0030426(growth cone),GO:0051015(actin filament binding)
NM_000259	hsa	4644	MYO5A	myosin VA (heavy chain 12, myoxin)	miR-5096	1	1	2	GO:0000146(microfilament motor activity),GO:0000166(nucleotide binding),GO:0001726(ruffle),GO:0005516(calmodulin binding),GO:0005524(ATP binding),GO:0005737(cytoplasm),GO:0006810(transport),GO:0016459(myosin complex),GO:0030048(actin filament-based movement),GO:0030426(growth cone),GO:0051015(actin filament binding)
NM_000260	hsa	4647	MYO7A	myosin VIIA	miR-1260b	1	1	2	GO:0000146(microfilament motor activity),GO:0000166(nucleotide binding),GO:0001750(photoreceptor outer segment),GO:0001917(photoreceptor inner segment),GO:0003779(actin binding),GO:0005516(calmodulin binding),GO:0005524(ATP binding),GO:0005737(cytoplasm),GO:0005765(lysosomal membrane),GO:0005829(cytosol),GO:0005856(cytoskeleton),GO:0007040(lysosome organization),GO:0007601(visual perception),GO:0…
NM_000260	hsa	4647	MYO7A	myosin VIIA	miR-494	1	1	2	GO:0000146(microfilament motor activity),GO:0000166(nucleotide binding),GO:0001750(photoreceptor outer segment),GO:0001917(photoreceptor inner segment),GO:0003779(actin binding),GO:0005516(calmodulin binding),GO:0005524(ATP binding),GO:0005737(cytoplasm),GO:0005765(lysosomal membrane),GO:0005829(cytosol),GO:0005856(cytoskeleton),GO:0007040(lysosome organization),GO:0007601(visual perception),GO:0…
NM_000262	hsa	4668	NAGA	N-acetylgalactosaminidase, alpha-	miR-1260b	1	1	2	GO:0004553(hydrolase activity, hydrolyzing O-glycosyl compounds),GO:0005764(lysosome),GO:0008152(metabolic process),GO:0008456(alpha-N-acetylgalactosaminidase activity),GO:0016052(carbohydrate catabolic process),GO:0019377(glycolipid catabolic process),GO:0042803(protein homodimerization activity),GO:0043169(cation binding)	ko00603(Glycosphingolipid biosynthesis - globo series),ko04142(Lysosome)
NM_000262	hsa	4668	NAGA	N-acetylgalactosaminidase, alpha-	miR-4324	1	1	2	GO:0004553(hydrolase activity, hydrolyzing O-glycosyl compounds),GO:0005764(lysosome),GO:0008152(metabolic process),GO:0008456(alpha-N-acetylgalactosaminidase activity),GO:0016052(carbohydrate catabolic process),GO:0019377(glycolipid catabolic process),GO:0042803(protein homodimerization activity),GO:0043169(cation binding)	ko00603(Glycosphingolipid biosynthesis - globo series),ko04142(Lysosome)
NM_000262	hsa	4668	NAGA	N-acetylgalactosaminidase, alpha-	miR-4455	1	1	2	GO:0004553(hydrolase activity, hydrolyzing O-glycosyl compounds),GO:0005764(lysosome),GO:0008152(metabolic process),GO:0008456(alpha-N-acetylgalactosaminidase activity),GO:0016052(carbohydrate catabolic process),GO:0019377(glycolipid catabolic process),GO:0042803(protein homodimerization activity),GO:0043169(cation binding)	ko00603(Glycosphingolipid biosynthesis - globo series),ko04142(Lysosome)
NM_000264	hsa	5727	PTCH1	patched homolog 1 (Drosophila)	miR-4277	1	1	2	GO:0001841(neural tube formation),GO:0001843(neural tube closure),GO:0003007(heart morphogenesis),GO:0004872(receptor activity),GO:0005113(patched binding),GO:0005515(protein binding),GO:0005887(integral to plasma membrane),GO:0007165(signal transduction),GO:0007389(pattern specification process),GO:0008158(hedgehog receptor activity),GO:0008201(heparin binding),GO:0008544(epidermis development),…	ko04340(Hedgehog signaling pathway),ko05200(Pathways in cancer),ko05217(Basal cell carcinoma)
NM_000264	hsa	5727	PTCH1	patched homolog 1 (Drosophila)	miR-5096	1	1	2	GO:0001841(neural tube formation),GO:0001843(neural tube closure),GO:0003007(heart morphogenesis),GO:0004872(receptor activity),GO:0005113(patched binding),GO:0005515(protein binding),GO:0005887(integral to plasma membrane),GO:0007165(signal transduction),GO:0007389(pattern specification process),GO:0008158(hedgehog receptor activity),GO:0008201(heparin binding),GO:0008544(epidermis development),…	ko04340(Hedgehog signaling pathway),ko05200(Pathways in cancer),ko05217(Basal cell carcinoma)
NM_000267	hsa	4763	NF1	neurofibromin 1	miR-103a	1	1	2	GO:0001649(osteoblast differentiation),GO:0001656(metanephros development),GO:0001666(response to hypoxia),GO:0001889(liver development),GO:0001937(negative regulation of endothelial cell proliferation),GO:0001952(regulation of cell-matrix adhesion),GO:0005099(Ras GTPase activator activity),GO:0005515(protein binding),GO:0005622(intracellular),GO:0005634(nucleus),GO:0005737(cytoplasm),GO:0007165(…	ko04010(MAPK signaling pathway)
NM_000267	hsa	4763	NF1	neurofibromin 1	miR-107	1	1	2	GO:0001649(osteoblast differentiation),GO:0001656(metanephros development),GO:0001666(response to hypoxia),GO:0001889(liver development),GO:0001937(negative regulation of endothelial cell proliferation),GO:0001952(regulation of cell-matrix adhesion),GO:0005099(Ras GTPase activator activity),GO:0005515(protein binding),GO:0005622(intracellular),GO:0005634(nucleus),GO:0005737(cytoplasm),GO:0007165(…	ko04010(MAPK signaling pathway)
NM_000267	hsa	4763	NF1	neurofibromin 1	miR-1246	1	1	2	GO:0001649(osteoblast differentiation),GO:0001656(metanephros development),GO:0001666(response to hypoxia),GO:0001889(liver development),GO:0001937(negative regulation of endothelial cell proliferation),GO:0001952(regulation of cell-matrix adhesion),GO:0005099(Ras GTPase activator activity),GO:0005515(protein binding),GO:0005622(intracellular),GO:0005634(nucleus),GO:0005737(cytoplasm),GO:0007165(…	ko04010(MAPK signaling pathway)
NM_000267	hsa	4763	NF1	neurofibromin 1	miR-181d	1	1	2	GO:0001649(osteoblast differentiation),GO:0001656(metanephros development),GO:0001666(response to hypoxia),GO:0001889(liver development),GO:0001937(negative regulation of endothelial cell proliferation),GO:0001952(regulation of cell-matrix adhesion),GO:0005099(Ras GTPase activator activity),GO:0005515(protein binding),GO:0005622(intracellular),GO:0005634(nucleus),GO:0005737(cytoplasm),GO:0007165(…	ko04010(MAPK signaling pathway)
NM_000267	hsa	4763	NF1	neurofibromin 1	miR-19b	1	1	2	GO:0001649(osteoblast differentiation),GO:0001656(metanephros development),GO:0001666(response to hypoxia),GO:0001889(liver development),GO:0001937(negative regulation of endothelial cell proliferation),GO:0001952(regulation of cell-matrix adhesion),GO:0005099(Ras GTPase activator activity),GO:0005515(protein binding),GO:0005622(intracellular),GO:0005634(nucleus),GO:0005737(cytoplasm),GO:0007165(…	ko04010(MAPK signaling pathway)
NM_000267	hsa	4763	NF1	neurofibromin 1	miR-4277	1	1	2	GO:0001649(osteoblast differentiation),GO:0001656(metanephros development),GO:0001666(response to hypoxia),GO:0001889(liver development),GO:0001937(negative regulation of endothelial cell proliferation),GO:0001952(regulation of cell-matrix adhesion),GO:0005099(Ras GTPase activator activity),GO:0005515(protein binding),GO:0005622(intracellular),GO:0005634(nucleus),GO:0005737(cytoplasm),GO:0007165(…	ko04010(MAPK signaling pathway)
NM_000268	hsa	4771	NF2	neurofibromin 2 (merlin)	miR-1260b	1	1	2	GO:0001707(mesoderm formation),GO:0001726(ruffle),GO:0001953(negative regulation of cell-matrix adhesion),GO:0005634(nucleus),GO:0005730(nucleolus),GO:0005737(cytoplasm),GO:0005769(early endosome),GO:0005856(cytoskeleton),GO:0005886(plasma membrane),GO:0005912(adherens junction),GO:0006469(negative regulation of protein kinase activity),GO:0007398(ectoderm development),GO:0008092(cytoskeletal pro…
NM_000268	hsa	4771	NF2	neurofibromin 2 (merlin)	miR-4530	1	1	2	GO:0001707(mesoderm formation),GO:0001726(ruffle),GO:0001953(negative regulation of cell-matrix adhesion),GO:0005634(nucleus),GO:0005730(nucleolus),GO:0005737(cytoplasm),GO:0005769(early endosome),GO:0005856(cytoskeleton),GO:0005886(plasma membrane),GO:0005912(adherens junction),GO:0006469(negative regulation of protein kinase activity),GO:0007398(ectoderm development),GO:0008092(cytoskeletal pro…
NM_000270	hsa	4860	PNP	purine nucleoside phosphorylase	miR-19b	1	1	2	GO:0001882(nucleoside binding),GO:0002060(purine binding),GO:0004731(purine-nucleoside phosphorylase activity),GO:0005622(intracellular),GO:0005737(cytoplasm),GO:0005829(cytosol),GO:0005856(cytoskeleton),GO:0006139(nucleobase, nucleoside, nucleotide and nucleic acid metabolic process),GO:0006148(inosine catabolic process),GO:0006738(nicotinamide riboside catabolic process),GO:0006955(immune respo…	ko00230(Purine metabolism),ko00240(Pyrimidine metabolism),ko00760(Nicotinate and nicotinamide metabolism),ko01100(Metabolic pathways)
NM_000270	hsa	4860	PNP	purine nucleoside phosphorylase	miR-4443	1	1	2	GO:0001882(nucleoside binding),GO:0002060(purine binding),GO:0004731(purine-nucleoside phosphorylase activity),GO:0005622(intracellular),GO:0005737(cytoplasm),GO:0005829(cytosol),GO:0005856(cytoskeleton),GO:0006139(nucleobase, nucleoside, nucleotide and nucleic acid metabolic process),GO:0006148(inosine catabolic process),GO:0006738(nicotinamide riboside catabolic process),GO:0006955(immune respo…	ko00230(Purine metabolism),ko00240(Pyrimidine metabolism),ko00760(Nicotinate and nicotinamide metabolism),ko01100(Metabolic pathways)
NM_000270	hsa	4860	PNP	purine nucleoside phosphorylase	miR-494	1	1	2	GO:0001882(nucleoside binding),GO:0002060(purine binding),GO:0004731(purine-nucleoside phosphorylase activity),GO:0005622(intracellular),GO:0005737(cytoplasm),GO:0005829(cytosol),GO:0005856(cytoskeleton),GO:0006139(nucleobase, nucleoside, nucleotide and nucleic acid metabolic process),GO:0006148(inosine catabolic process),GO:0006738(nicotinamide riboside catabolic process),GO:0006955(immune respo…	ko00230(Purine metabolism),ko00240(Pyrimidine metabolism),ko00760(Nicotinate and nicotinamide metabolism),ko01100(Metabolic pathways)
NM_000271	hsa	4864	NPC1	Niemann-Pick disease, type C1	miR-320a	1	1	2	GO:0005515(protein binding),GO:0005635(nuclear envelope),GO:0005764(lysosome),GO:0005768(endosome),GO:0005783(endoplasmic reticulum),GO:0005887(integral to plasma membrane),GO:0006897(endocytosis),GO:0007041(lysosomal transport),GO:0008158(hedgehog receptor activity),GO:0008206(bile acid metabolic process),GO:0015248(sterol transporter activity),GO:0016020(membrane),GO:0016242(negative regulation…	ko04142(Lysosome)
NM_000271	hsa	4864	NPC1	Niemann-Pick disease, type C1	miR-320b	1	1	2	GO:0005515(protein binding),GO:0005635(nuclear envelope),GO:0005764(lysosome),GO:0005768(endosome),GO:0005783(endoplasmic reticulum),GO:0005887(integral to plasma membrane),GO:0006897(endocytosis),GO:0007041(lysosomal transport),GO:0008158(hedgehog receptor activity),GO:0008206(bile acid metabolic process),GO:0015248(sterol transporter activity),GO:0016020(membrane),GO:0016242(negative regulation…	ko04142(Lysosome)
NM_000271	hsa	4864	NPC1	Niemann-Pick disease, type C1	miR-320c	1	1	2	GO:0005515(protein binding),GO:0005635(nuclear envelope),GO:0005764(lysosome),GO:0005768(endosome),GO:0005783(endoplasmic reticulum),GO:0005887(integral to plasma membrane),GO:0006897(endocytosis),GO:0007041(lysosomal transport),GO:0008158(hedgehog receptor activity),GO:0008206(bile acid metabolic process),GO:0015248(sterol transporter activity),GO:0016020(membrane),GO:0016242(negative regulation…	ko04142(Lysosome)
NM_000273	hsa	4935	GPR143	G protein-coupled receptor 143	miR-4277	1	1	2	GO:0004872(receptor activity),GO:0004930(G-protein coupled receptor activity),GO:0005624(membrane fraction),GO:0005737(cytoplasm),GO:0006726(eye pigment biosynthetic process),GO:0007165(signal transduction),GO:0007186(G-protein coupled receptor protein signaling pathway),GO:0007601(visual perception),GO:0016020(membrane),GO:0016021(integral to membrane)
NM_000274	hsa	4942	OAT	ornithine aminotransferase (gyrate atrophy)	miR-5096	1	1	2	GO:0004587(ornithine-oxo-acid transaminase activity),GO:0005515(protein binding),GO:0005737(cytoplasm),GO:0005739(mitochondrion),GO:0005759(mitochondrial matrix),GO:0007601(visual perception),GO:0016740(transferase activity),GO:0030170(pyridoxal phosphate binding)	ko00330(Arginine and proline metabolism),ko01100(Metabolic pathways)
NM_000276	hsa	4952	OCRL	oculocerebrorenal syndrome of Lowe	miR-1246	1	1	2	GO:0004437(inositol or phosphatidylinositol phosphatase activity),GO:0004439(phosphatidylinositol-4,5-bisphosphate 5-phosphatase activity),GO:0005622(intracellular),GO:0005795(Golgi stack),GO:0005798(Golgi-associated vesicle),GO:0006629(lipid metabolic process),GO:0007165(signal transduction),GO:0016787(hydrolase activity)	ko00562(Inositol phosphate metabolism),ko01100(Metabolic pathways),ko04070(Phosphatidylinositol signaling system)
NM_000276	hsa	4952	OCRL	oculocerebrorenal syndrome of Lowe	miR-19b	1	1	2	GO:0004437(inositol or phosphatidylinositol phosphatase activity),GO:0004439(phosphatidylinositol-4,5-bisphosphate 5-phosphatase activity),GO:0005622(intracellular),GO:0005795(Golgi stack),GO:0005798(Golgi-associated vesicle),GO:0006629(lipid metabolic process),GO:0007165(signal transduction),GO:0016787(hydrolase activity)	ko00562(Inositol phosphate metabolism),ko01100(Metabolic pathways),ko04070(Phosphatidylinositol signaling system)
NM_000276	hsa	4952	OCRL	oculocerebrorenal syndrome of Lowe	miR-3591-3p	1	1	2	GO:0004437(inositol or phosphatidylinositol phosphatase activity),GO:0004439(phosphatidylinositol-4,5-bisphosphate 5-phosphatase activity),GO:0005622(intracellular),GO:0005795(Golgi stack),GO:0005798(Golgi-associated vesicle),GO:0006629(lipid metabolic process),GO:0007165(signal transduction),GO:0016787(hydrolase activity)	ko00562(Inositol phosphate metabolism),ko01100(Metabolic pathways),ko04070(Phosphatidylinositol signaling system)
NM_000276	hsa	4952	OCRL	oculocerebrorenal syndrome of Lowe	miR-3665	1	1	2	GO:0004437(inositol or phosphatidylinositol phosphatase activity),GO:0004439(phosphatidylinositol-4,5-bisphosphate 5-phosphatase activity),GO:0005622(intracellular),GO:0005795(Golgi stack),GO:0005798(Golgi-associated vesicle),GO:0006629(lipid metabolic process),GO:0007165(signal transduction),GO:0016787(hydrolase activity)	ko00562(Inositol phosphate metabolism),ko01100(Metabolic pathways),ko04070(Phosphatidylinositol signaling system)
NM_000277	hsa	5053	PAH	phenylalanine hydroxylase	miR-23c	1	1	2	GO:0004505(phenylalanine 4-monooxygenase activity),GO:0005506(iron ion binding),GO:0006559(L-phenylalanine catabolic process),GO:0006571(tyrosine biosynthetic process),GO:0008652(cellular amino acid biosynthetic process),GO:0009072(aromatic amino acid family metabolic process),GO:0016597(amino acid binding),GO:0018126(protein amino acid hydroxylation),GO:0042136(neurotransmitter biosynthetic proc…	ko00360(Phenylalanine metabolism),ko00400(Phenylalanine,ko tyrosine and tryptophan biosynthesis),ko01100(Metabolic pathways)
NM_000277	hsa	5053	PAH	phenylalanine hydroxylase	miR-4687-3p	1	1	2	GO:0004505(phenylalanine 4-monooxygenase activity),GO:0005506(iron ion binding),GO:0006559(L-phenylalanine catabolic process),GO:0006571(tyrosine biosynthetic process),GO:0008652(cellular amino acid biosynthetic process),GO:0009072(aromatic amino acid family metabolic process),GO:0016597(amino acid binding),GO:0018126(protein amino acid hydroxylation),GO:0042136(neurotransmitter biosynthetic proc…	ko00360(Phenylalanine metabolism),ko00400(Phenylalanine,ko tyrosine and tryptophan biosynthesis),ko01100(Metabolic pathways)
NM_000280	hsa	5080	PAX6	paired box 6	miR-3591-3p	1	1	2	GO:0001654(eye development),GO:0003700(transcription factor activity),GO:0005515(protein binding),GO:0005634(nucleus),GO:0005737(cytoplasm),GO:0006355(regulation of transcription, DNA-dependent),GO:0007275(multicellular organismal development),GO:0007417(central nervous system development),GO:0007601(visual perception),GO:0009611(response to wounding),GO:0009887(organ morphogenesis),GO:0030154(ce…	ko04950(Maturity onset diabetes of the young)
NM_000280	hsa	5080	PAX6	paired box 6	miR-4455	1	1	2	GO:0001654(eye development),GO:0003700(transcription factor activity),GO:0005515(protein binding),GO:0005634(nucleus),GO:0005737(cytoplasm),GO:0006355(regulation of transcription, DNA-dependent),GO:0007275(multicellular organismal development),GO:0007417(central nervous system development),GO:0007601(visual perception),GO:0009611(response to wounding),GO:0009887(organ morphogenesis),GO:0030154(ce…	ko04950(Maturity onset diabetes of the young)
NM_000280	hsa	5080	PAX6	paired box 6	miR-494	1	1	2	GO:0001654(eye development),GO:0003700(transcription factor activity),GO:0005515(protein binding),GO:0005634(nucleus),GO:0005737(cytoplasm),GO:0006355(regulation of transcription, DNA-dependent),GO:0007275(multicellular organismal development),GO:0007417(central nervous system development),GO:0007601(visual perception),GO:0009611(response to wounding),GO:0009887(organ morphogenesis),GO:0030154(ce…	ko04950(Maturity onset diabetes of the young)
NM_000281	hsa	5092	PCBD1	pterin-4 alpha-carbinolamine dehydratase/dimerization cofactor of hepatocyte nuclear factor 1 alpha	miR-5096	1	1	2	GO:0003713(transcription coactivator activity),GO:0004505(phenylalanine 4-monooxygenase activity),GO:0005634(nucleus),GO:0005737(cytoplasm),GO:0006729(tetrahydrobiopterin biosynthetic process),GO:0008124(4-alpha-hydroxytetrahydrobiopterin dehydratase activity),GO:0016829(lyase activity),GO:0042802(identical protein binding),GO:0043496(regulation of protein homodimerization activity),GO:0045941(po…
NM_000284	hsa	5160	PDHA1	pyruvate dehydrogenase (lipoamide) alpha 1	miR-4530	1	1	2	GO:0004739(pyruvate dehydrogenase (acetyl-transferring) activity),GO:0005515(protein binding),GO:0005739(mitochondrion),GO:0005759(mitochondrial matrix),GO:0006090(pyruvate metabolic process),GO:0006096(glycolysis),GO:0016491(oxidoreductase activity),GO:0055114(oxidation reduction)	ko00010(Glycolysis / Gluconeogenesis),ko00020(Citrate cycle (TCA cycle)),ko00290(Valine,ko leucine and isoleucine biosynthesis),ko00620(Pyruvate metabolism),ko00650(Butanoate metabolism),ko01100(Metabolic pathways)
NM_000286	hsa	5193	PEX12	peroxisomal biogenesis factor 12	miR-320a	1	1	2	GO:0005777(peroxisome),GO:0005778(peroxisomal membrane),GO:0005779(integral to peroxisomal membrane),GO:0008022(protein C-terminus binding),GO:0008270(zinc ion binding),GO:0016020(membrane),GO:0016021(integral to membrane),GO:0016558(protein import into peroxisome matrix),GO:0046872(metal ion binding)
NM_000286	hsa	5193	PEX12	peroxisomal biogenesis factor 12	miR-320b	1	1	2	GO:0005777(peroxisome),GO:0005778(peroxisomal membrane),GO:0005779(integral to peroxisomal membrane),GO:0008022(protein C-terminus binding),GO:0008270(zinc ion binding),GO:0016020(membrane),GO:0016021(integral to membrane),GO:0016558(protein import into peroxisome matrix),GO:0046872(metal ion binding)
NM_000286	hsa	5193	PEX12	peroxisomal biogenesis factor 12	miR-320c	1	1	2	GO:0005777(peroxisome),GO:0005778(peroxisomal membrane),GO:0005779(integral to peroxisomal membrane),GO:0008022(protein C-terminus binding),GO:0008270(zinc ion binding),GO:0016020(membrane),GO:0016021(integral to membrane),GO:0016558(protein import into peroxisome matrix),GO:0046872(metal ion binding)
NM_000288	hsa	5191	PEX7	peroxisomal biogenesis factor 7	miR-4277	1	1	2	GO:0001764(neuron migration),GO:0001958(endochondral ossification),GO:0005053(peroxisome matrix targeting signal-2 binding),GO:0005737(cytoplasm),GO:0005777(peroxisome),GO:0005829(cytosol),GO:0006635(fatty acid beta-oxidation),GO:0007601(visual perception),GO:0008611(ether lipid biosynthetic process),GO:0015031(protein transport),GO:0016558(protein import into peroxisome matrix),GO:0050896(respon…
NM_000289	hsa	5213	PFKM	phosphofructokinase, muscle	miR-1260b	1	1	2	GO:0000166(nucleotide binding),GO:0000287(magnesium ion binding),GO:0003872(6-phosphofructokinase activity),GO:0005524(ATP binding),GO:0005529(sugar binding),GO:0005625(soluble fraction),GO:0005737(cytoplasm),GO:0005829(cytosol),GO:0005945(6-phosphofructokinase complex),GO:0006002(fructose 6-phosphate metabolic process),GO:0006096(glycolysis),GO:0008022(protein C-terminus binding),GO:0016208(AMP …	ko00010(Glycolysis / Gluconeogenesis),ko00030(Pentose phosphate pathway),ko00051(Fructose and mannose metabolism),ko00052(Galactose metabolism),ko01100(Metabolic pathways)
NM_000289	hsa	5213	PFKM	phosphofructokinase, muscle	miR-19b	1	1	2	GO:0000166(nucleotide binding),GO:0000287(magnesium ion binding),GO:0003872(6-phosphofructokinase activity),GO:0005524(ATP binding),GO:0005529(sugar binding),GO:0005625(soluble fraction),GO:0005737(cytoplasm),GO:0005829(cytosol),GO:0005945(6-phosphofructokinase complex),GO:0006002(fructose 6-phosphate metabolic process),GO:0006096(glycolysis),GO:0008022(protein C-terminus binding),GO:0016208(AMP …	ko00010(Glycolysis / Gluconeogenesis),ko00030(Pentose phosphate pathway),ko00051(Fructose and mannose metabolism),ko00052(Galactose metabolism),ko01100(Metabolic pathways)
NM_000289	hsa	5213	PFKM	phosphofructokinase, muscle	miR-320a	1	1	2	GO:0000166(nucleotide binding),GO:0000287(magnesium ion binding),GO:0003872(6-phosphofructokinase activity),GO:0005524(ATP binding),GO:0005529(sugar binding),GO:0005625(soluble fraction),GO:0005737(cytoplasm),GO:0005829(cytosol),GO:0005945(6-phosphofructokinase complex),GO:0006002(fructose 6-phosphate metabolic process),GO:0006096(glycolysis),GO:0008022(protein C-terminus binding),GO:0016208(AMP …	ko00010(Glycolysis / Gluconeogenesis),ko00030(Pentose phosphate pathway),ko00051(Fructose and mannose metabolism),ko00052(Galactose metabolism),ko01100(Metabolic pathways)
NM_000289	hsa	5213	PFKM	phosphofructokinase, muscle	miR-320b	1	1	2	GO:0000166(nucleotide binding),GO:0000287(magnesium ion binding),GO:0003872(6-phosphofructokinase activity),GO:0005524(ATP binding),GO:0005529(sugar binding),GO:0005625(soluble fraction),GO:0005737(cytoplasm),GO:0005829(cytosol),GO:0005945(6-phosphofructokinase complex),GO:0006002(fructose 6-phosphate metabolic process),GO:0006096(glycolysis),GO:0008022(protein C-terminus binding),GO:0016208(AMP …	ko00010(Glycolysis / Gluconeogenesis),ko00030(Pentose phosphate pathway),ko00051(Fructose and mannose metabolism),ko00052(Galactose metabolism),ko01100(Metabolic pathways)
NM_000289	hsa	5213	PFKM	phosphofructokinase, muscle	miR-320c	1	1	2	GO:0000166(nucleotide binding),GO:0000287(magnesium ion binding),GO:0003872(6-phosphofructokinase activity),GO:0005524(ATP binding),GO:0005529(sugar binding),GO:0005625(soluble fraction),GO:0005737(cytoplasm),GO:0005829(cytosol),GO:0005945(6-phosphofructokinase complex),GO:0006002(fructose 6-phosphate metabolic process),GO:0006096(glycolysis),GO:0008022(protein C-terminus binding),GO:0016208(AMP …	ko00010(Glycolysis / Gluconeogenesis),ko00030(Pentose phosphate pathway),ko00051(Fructose and mannose metabolism),ko00052(Galactose metabolism),ko01100(Metabolic pathways)
NM_000289	hsa	5213	PFKM	phosphofructokinase, muscle	miR-4455	1	1	2	GO:0000166(nucleotide binding),GO:0000287(magnesium ion binding),GO:0003872(6-phosphofructokinase activity),GO:0005524(ATP binding),GO:0005529(sugar binding),GO:0005625(soluble fraction),GO:0005737(cytoplasm),GO:0005829(cytosol),GO:0005945(6-phosphofructokinase complex),GO:0006002(fructose 6-phosphate metabolic process),GO:0006096(glycolysis),GO:0008022(protein C-terminus binding),GO:0016208(AMP …	ko00010(Glycolysis / Gluconeogenesis),ko00030(Pentose phosphate pathway),ko00051(Fructose and mannose metabolism),ko00052(Galactose metabolism),ko01100(Metabolic pathways)
NM_000291	hsa	5230	PGK1	phosphoglycerate kinase 1	miR-494	1	1	2	GO:0000166(nucleotide binding),GO:0004618(phosphoglycerate kinase activity),GO:0005524(ATP binding),GO:0005737(cytoplasm),GO:0006096(glycolysis),GO:0016310(phosphorylation),GO:0016740(transferase activity)	ko00010(Glycolysis / Gluconeogenesis),ko01100(Metabolic pathways)
NM_000292	hsa	5256	PHKA2	phosphorylase kinase, alpha 2 (liver)	miR-4734	1	1	2	GO:0003824(catalytic activity),GO:0004339(glucan 1,4-alpha-glucosidase activity),GO:0004689(phosphorylase kinase activity),GO:0005516(calmodulin binding),GO:0005886(plasma membrane),GO:0005964(phosphorylase kinase complex),GO:0005976(polysaccharide metabolic process),GO:0005977(glycogen metabolic process),GO:0006091(generation of precursor metabolites and energy),GO:0006464(protein modification p…	ko04020(Calcium signaling pathway),ko04910(Insulin signaling pathway)
NM_000293	hsa	5257	PHKB	phosphorylase kinase, beta	miR-4534	1	1	2	GO:0003824(catalytic activity),GO:0004339(glucan 1,4-alpha-glucosidase activity),GO:0004689(phosphorylase kinase activity),GO:0005516(calmodulin binding),GO:0005886(plasma membrane),GO:0005964(phosphorylase kinase complex),GO:0005976(polysaccharide metabolic process),GO:0005977(glycogen metabolic process),GO:0006091(generation of precursor metabolites and energy)	ko04020(Calcium signaling pathway),ko04910(Insulin signaling pathway)
NM_000293	hsa	5257	PHKB	phosphorylase kinase, beta	miR-5096	1	1	2	GO:0003824(catalytic activity),GO:0004339(glucan 1,4-alpha-glucosidase activity),GO:0004689(phosphorylase kinase activity),GO:0005516(calmodulin binding),GO:0005886(plasma membrane),GO:0005964(phosphorylase kinase complex),GO:0005976(polysaccharide metabolic process),GO:0005977(glycogen metabolic process),GO:0006091(generation of precursor metabolites and energy)	ko04020(Calcium signaling pathway),ko04910(Insulin signaling pathway)
NM_000294	hsa	5261	PHKG2	phosphorylase kinase, gamma 2 (testis)	miR-4443	1	1	2	GO:0000166(nucleotide binding),GO:0004674(protein serine/threonine kinase activity),GO:0004689(phosphorylase kinase activity),GO:0005516(calmodulin binding),GO:0005524(ATP binding),GO:0005575(cellular_component),GO:0005625(soluble fraction),GO:0005964(phosphorylase kinase complex),GO:0005975(carbohydrate metabolic process),GO:0005978(glycogen biosynthetic process),GO:0006091(generation of precurs…	ko04020(Calcium signaling pathway),ko04910(Insulin signaling pathway)
NM_000295	hsa	5265	SERPINA1	serpin peptidase inhibitor, clade A (alpha-1 antiproteinase, antitrypsin), member 1	miR-181d	1	1	2	GO:0001666(response to hypoxia),GO:0002020(protease binding),GO:0004867(serine-type endopeptidase inhibitor activity),GO:0005515(protein binding),GO:0005576(extracellular region),GO:0005578(proteinaceous extracellular matrix),GO:0005615(extracellular space),GO:0006953(acute-phase response),GO:0007596(blood coagulation),GO:0010288(response to lead ion),GO:0014070(response to organic cyclic substan…	ko04610(Complement and coagulation cascades)
NM_000295	hsa	5265	SERPINA1	serpin peptidase inhibitor, clade A (alpha-1 antiproteinase, antitrypsin), member 1	miR-4534	1	1	2	GO:0001666(response to hypoxia),GO:0002020(protease binding),GO:0004867(serine-type endopeptidase inhibitor activity),GO:0005515(protein binding),GO:0005576(extracellular region),GO:0005578(proteinaceous extracellular matrix),GO:0005615(extracellular space),GO:0006953(acute-phase response),GO:0007596(blood coagulation),GO:0010288(response to lead ion),GO:0014070(response to organic cyclic substan…	ko04610(Complement and coagulation cascades)
NM_000295	hsa	5265	SERPINA1	serpin peptidase inhibitor, clade A (alpha-1 antiproteinase, antitrypsin), member 1	miR-5096	1	1	2	GO:0001666(response to hypoxia),GO:0002020(protease binding),GO:0004867(serine-type endopeptidase inhibitor activity),GO:0005515(protein binding),GO:0005576(extracellular region),GO:0005578(proteinaceous extracellular matrix),GO:0005615(extracellular space),GO:0006953(acute-phase response),GO:0007596(blood coagulation),GO:0010288(response to lead ion),GO:0014070(response to organic cyclic substan…	ko04610(Complement and coagulation cascades)
NM_000296	hsa	5310	PKD1	polycystic kidney disease 1 (autosomal dominant)	miR-3591-3p	1	1	2	GO:0001502(cartilage condensation),GO:0001568(blood vessel development),GO:0001701(in utero embryonic development),GO:0002133(polycystin complex),GO:0005261(cation channel activity),GO:0005515(protein binding),GO:0005529(sugar binding),GO:0005624(membrane fraction),GO:0005634(nucleus),GO:0005794(Golgi apparatus),GO:0005886(plasma membrane),GO:0005887(integral to plasma membrane),GO:0006816(calciu…
NM_000296	hsa	5310	PKD1	polycystic kidney disease 1 (autosomal dominant)	miR-3665	1	1	2	GO:0001502(cartilage condensation),GO:0001568(blood vessel development),GO:0001701(in utero embryonic development),GO:0002133(polycystin complex),GO:0005261(cation channel activity),GO:0005515(protein binding),GO:0005529(sugar binding),GO:0005624(membrane fraction),GO:0005634(nucleus),GO:0005794(Golgi apparatus),GO:0005886(plasma membrane),GO:0005887(integral to plasma membrane),GO:0006816(calciu…
NM_000297	hsa	5311	PKD2	polycystic kidney disease 2 (autosomal dominant)	miR-181d	1	1	2	GO:0001822(kidney development),GO:0001892(embryonic placenta development),GO:0002133(polycystin complex),GO:0005102(receptor binding),GO:0005216(ion channel activity),GO:0005247(voltage-gated chloride channel activity),GO:0005248(voltage-gated sodium channel activity),GO:0005267(potassium channel activity),GO:0005509(calcium ion binding),GO:0005783(endoplasmic reticulum),GO:0005886(plasma membran…
NM_000297	hsa	5311	PKD2	polycystic kidney disease 2 (autosomal dominant)	miR-4534	1	1	2	GO:0001822(kidney development),GO:0001892(embryonic placenta development),GO:0002133(polycystin complex),GO:0005102(receptor binding),GO:0005216(ion channel activity),GO:0005247(voltage-gated chloride channel activity),GO:0005248(voltage-gated sodium channel activity),GO:0005267(potassium channel activity),GO:0005509(calcium ion binding),GO:0005783(endoplasmic reticulum),GO:0005886(plasma membran…
NM_000299	hsa	5317	PKP1	plakophilin 1 (ectodermal dysplasia/skin fragility syndrome)	miR-4324	1	1	2	GO:0004871(signal transducer activity),GO:0005515(protein binding),GO:0005634(nucleus),GO:0005882(intermediate filament),GO:0005886(plasma membrane),GO:0007155(cell adhesion),GO:0007165(signal transduction),GO:0007275(multicellular organismal development),GO:0019215(intermediate filament binding),GO:0030054(cell junction),GO:0030057(desmosome),GO:0030280(structural constituent of epidermis)
NM_000299	hsa	5317	PKP1	plakophilin 1 (ectodermal dysplasia/skin fragility syndrome)	miR-5096	1	1	2	GO:0004871(signal transducer activity),GO:0005515(protein binding),GO:0005634(nucleus),GO:0005882(intermediate filament),GO:0005886(plasma membrane),GO:0007155(cell adhesion),GO:0007165(signal transduction),GO:0007275(multicellular organismal development),GO:0019215(intermediate filament binding),GO:0030054(cell junction),GO:0030057(desmosome),GO:0030280(structural constituent of epidermis)
NM_000301	hsa	5340	PLG	plasminogen	miR-181d	1	1	2	GO:0004252(serine-type endopeptidase activity),GO:0005509(calcium ion binding),GO:0005576(extracellular region),GO:0005615(extracellular space),GO:0005792(microsome),GO:0006915(apoptosis),GO:0006917(induction of apoptosis),GO:0007596(blood coagulation),GO:0008233(peptidase activity),GO:0008285(negative regulation of cell proliferation),GO:0016525(negative regulation of angiogenesis),GO:0034185(ap…	ko04080(Neuroactive ligand-receptor interaction),ko04610(Complement and coagulation cascades)
NM_000301	hsa	5340	PLG	plasminogen	miR-4530	1	1	2	GO:0004252(serine-type endopeptidase activity),GO:0005509(calcium ion binding),GO:0005576(extracellular region),GO:0005615(extracellular space),GO:0005792(microsome),GO:0006915(apoptosis),GO:0006917(induction of apoptosis),GO:0007596(blood coagulation),GO:0008233(peptidase activity),GO:0008285(negative regulation of cell proliferation),GO:0016525(negative regulation of angiogenesis),GO:0034185(ap…	ko04080(Neuroactive ligand-receptor interaction),ko04610(Complement and coagulation cascades)
NM_000302	hsa	5351	PLOD1	procollagen-lysine 1, 2-oxoglutarate 5-dioxygenase 1	miR-4443	1	1	2	GO:0001666(response to hypoxia),GO:0005506(iron ion binding),GO:0005783(endoplasmic reticulum),GO:0006464(protein modification process),GO:0008475(procollagen-lysine 5-dioxygenase activity),GO:0008544(epidermis development),GO:0016020(membrane),GO:0016702(oxidoreductase activity, acting on single donors with incorporation of molecular oxygen, incorporation of two atoms of oxygen),GO:0016705(oxido…	ko00310(Lysine degradation)
NM_000303	hsa	5373	PMM2	phosphomannomutase 2	miR-4324	1	1	2	GO:0004615(phosphomannomutase activity),GO:0005737(cytoplasm),GO:0006486(protein amino acid glycosylation),GO:0008152(metabolic process),GO:0009298(GDP-mannose biosynthetic process),GO:0016853(isomerase activity)	ko00051(Fructose and mannose metabolism),ko00520(Amino sugar and nucleotide sugar metabolism),ko01100(Metabolic pathways)
NM_000303	hsa	5373	PMM2	phosphomannomutase 2	miR-4443	1	1	2	GO:0004615(phosphomannomutase activity),GO:0005737(cytoplasm),GO:0006486(protein amino acid glycosylation),GO:0008152(metabolic process),GO:0009298(GDP-mannose biosynthetic process),GO:0016853(isomerase activity)	ko00051(Fructose and mannose metabolism),ko00520(Amino sugar and nucleotide sugar metabolism),ko01100(Metabolic pathways)
NM_000303	hsa	5373	PMM2	phosphomannomutase 2	miR-4530	1	1	2	GO:0004615(phosphomannomutase activity),GO:0005737(cytoplasm),GO:0006486(protein amino acid glycosylation),GO:0008152(metabolic process),GO:0009298(GDP-mannose biosynthetic process),GO:0016853(isomerase activity)	ko00051(Fructose and mannose metabolism),ko00520(Amino sugar and nucleotide sugar metabolism),ko01100(Metabolic pathways)
NM_000303	hsa	5373	PMM2	phosphomannomutase 2	miR-4734	1	1	2	GO:0004615(phosphomannomutase activity),GO:0005737(cytoplasm),GO:0006486(protein amino acid glycosylation),GO:0008152(metabolic process),GO:0009298(GDP-mannose biosynthetic process),GO:0016853(isomerase activity)	ko00051(Fructose and mannose metabolism),ko00520(Amino sugar and nucleotide sugar metabolism),ko01100(Metabolic pathways)
NM_000304	hsa	5376	PMP22	peripheral myelin protein 22	miR-4443	1	1	2	GO:0005923(tight junction),GO:0007268(synaptic transmission),GO:0007422(peripheral nervous system development),GO:0008285(negative regulation of cell proliferation),GO:0016020(membrane),GO:0016021(integral to membrane),GO:0030154(cell differentiation),GO:0032288(myelin assembly),GO:0043218(compact myelin)
NM_000304	hsa	5376	PMP22	peripheral myelin protein 22	miR-4534	1	1	2	GO:0005923(tight junction),GO:0007268(synaptic transmission),GO:0007422(peripheral nervous system development),GO:0008285(negative regulation of cell proliferation),GO:0016020(membrane),GO:0016021(integral to membrane),GO:0030154(cell differentiation),GO:0032288(myelin assembly),GO:0043218(compact myelin)
NM_000304	hsa	5376	PMP22	peripheral myelin protein 22	miR-4687-3p	1	1	2	GO:0005923(tight junction),GO:0007268(synaptic transmission),GO:0007422(peripheral nervous system development),GO:0008285(negative regulation of cell proliferation),GO:0016020(membrane),GO:0016021(integral to membrane),GO:0030154(cell differentiation),GO:0032288(myelin assembly),GO:0043218(compact myelin)
NM_000305	hsa	5445	PON2	paraoxonase 2	miR-19b	1	1	2	GO:0004063(aryldialkylphosphatase activity),GO:0004064(arylesterase activity),GO:0005509(calcium ion binding),GO:0005576(extracellular region),GO:0005886(plasma membrane),GO:0016787(hydrolase activity),GO:0019439(aromatic compound catabolic process),GO:0019898(extrinsic to membrane),GO:0042802(identical protein binding)	ko01100(Metabolic pathways)
NM_000308	hsa	5476	CTSA	cathepsin A	miR-4734	1	1	2	GO:0004185(serine-type carboxypeptidase activity),GO:0005515(protein binding),GO:0005739(mitochondrion),GO:0005764(lysosome),GO:0005783(endoplasmic reticulum),GO:0006508(proteolysis),GO:0006886(intracellular protein transport),GO:0008047(enzyme activator activity),GO:0008233(peptidase activity)	ko04614(Renin-angiotensin system)
NM_000310	hsa	5538	PPT1	palmitoyl-protein thioesterase 1	miR-3591-3p	1	1	2	GO:0002084(protein depalmitoylation),GO:0005576(extracellular region),GO:0005624(membrane fraction),GO:0005634(nucleus),GO:0005764(lysosome),GO:0005794(Golgi apparatus),GO:0005829(cytosol),GO:0006309(DNA fragmentation involved in apoptosis),GO:0007042(lysosomal lumen acidification),GO:0007399(nervous system development),GO:0007420(brain development),GO:0007601(visual perception),GO:0008021(synapt…	ko00062(Fatty acid elongation in mitochondria),ko01100(Metabolic pathways),ko04142(Lysosome)
NM_000311	hsa	5621	PRNP	prion protein	miR-3665	1	1	2	GO:0005507(copper ion binding),GO:0005737(cytoplasm),GO:0005783(endoplasmic reticulum),GO:0005794(Golgi apparatus),GO:0005886(plasma membrane),GO:0006878(cellular copper ion homeostasis),GO:0006916(anti-apoptosis),GO:0006979(response to oxidative stress),GO:0008017(microtubule binding),GO:0008152(metabolic process),GO:0019898(extrinsic to membrane),GO:0031225(anchored to membrane),GO:0042802(iden…	ko05020(Prion diseases)
NM_000311	hsa	5621	PRNP	prion protein	miR-4277	1	1	2	GO:0005507(copper ion binding),GO:0005737(cytoplasm),GO:0005783(endoplasmic reticulum),GO:0005794(Golgi apparatus),GO:0005886(plasma membrane),GO:0006878(cellular copper ion homeostasis),GO:0006916(anti-apoptosis),GO:0006979(response to oxidative stress),GO:0008017(microtubule binding),GO:0008152(metabolic process),GO:0019898(extrinsic to membrane),GO:0031225(anchored to membrane),GO:0042802(iden…	ko05020(Prion diseases)
NM_000311	hsa	5621	PRNP	prion protein	miR-4497	1	1	2	GO:0005507(copper ion binding),GO:0005737(cytoplasm),GO:0005783(endoplasmic reticulum),GO:0005794(Golgi apparatus),GO:0005886(plasma membrane),GO:0006878(cellular copper ion homeostasis),GO:0006916(anti-apoptosis),GO:0006979(response to oxidative stress),GO:0008017(microtubule binding),GO:0008152(metabolic process),GO:0019898(extrinsic to membrane),GO:0031225(anchored to membrane),GO:0042802(iden…	ko05020(Prion diseases)
NM_000313	hsa	5627	PROS1	protein S (alpha)	miR-23c	1	1	2	GO:0004866(endopeptidase inhibitor activity),GO:0005509(calcium ion binding),GO:0005576(extracellular region),GO:0007596(blood coagulation),GO:0031093(platelet alpha granule lumen)	ko04610(Complement and coagulation cascades)
NM_000313	hsa	5627	PROS1	protein S (alpha)	miR-320a	1	1	2	GO:0004866(endopeptidase inhibitor activity),GO:0005509(calcium ion binding),GO:0005576(extracellular region),GO:0007596(blood coagulation),GO:0031093(platelet alpha granule lumen)	ko04610(Complement and coagulation cascades)
NM_000313	hsa	5627	PROS1	protein S (alpha)	miR-320b	1	1	2	GO:0004866(endopeptidase inhibitor activity),GO:0005509(calcium ion binding),GO:0005576(extracellular region),GO:0007596(blood coagulation),GO:0031093(platelet alpha granule lumen)	ko04610(Complement and coagulation cascades)
NM_000313	hsa	5627	PROS1	protein S (alpha)	miR-320c	1	1	2	GO:0004866(endopeptidase inhibitor activity),GO:0005509(calcium ion binding),GO:0005576(extracellular region),GO:0007596(blood coagulation),GO:0031093(platelet alpha granule lumen)	ko04610(Complement and coagulation cascades)
NM_000313	hsa	5627	PROS1	protein S (alpha)	miR-4530	1	1	2	GO:0004866(endopeptidase inhibitor activity),GO:0005509(calcium ion binding),GO:0005576(extracellular region),GO:0007596(blood coagulation),GO:0031093(platelet alpha granule lumen)	ko04610(Complement and coagulation cascades)
NM_000313	hsa	5627	PROS1	protein S (alpha)	miR-494	1	1	2	GO:0004866(endopeptidase inhibitor activity),GO:0005509(calcium ion binding),GO:0005576(extracellular region),GO:0007596(blood coagulation),GO:0031093(platelet alpha granule lumen)	ko04610(Complement and coagulation cascades)
NM_000314	hsa	5728	PTEN	phosphatase and tensin homolog	miR-103a	1	1	2	GO:0000079(regulation of cyclin-dependent protein kinase activity),GO:0000287(magnesium ion binding),GO:0001525(angiogenesis),GO:0004438(phosphatidylinositol-3-phosphatase activity),GO:0004722(protein serine/threonine phosphatase activity),GO:0004725(protein tyrosine phosphatase activity),GO:0005161(platelet-derived growth factor receptor binding),GO:0005515(protein binding),GO:0005634(nucleus),G…	ko00562(Inositol phosphate metabolism),ko04070(Phosphatidylinositol signaling system),ko04115(p53 signaling pathway),ko04510(Focal adhesion),ko04530(Tight junction),ko05200(Pathways in cancer),ko05213(Endometrial cancer),ko05214(Glioma),ko05215(Prostate cancer),ko05218(Melanoma),ko05222(Small cell lung cancer)
NM_000314	hsa	5728	PTEN	phosphatase and tensin homolog	miR-107	1	1	2	GO:0000079(regulation of cyclin-dependent protein kinase activity),GO:0000287(magnesium ion binding),GO:0001525(angiogenesis),GO:0004438(phosphatidylinositol-3-phosphatase activity),GO:0004722(protein serine/threonine phosphatase activity),GO:0004725(protein tyrosine phosphatase activity),GO:0005161(platelet-derived growth factor receptor binding),GO:0005515(protein binding),GO:0005634(nucleus),G…	ko00562(Inositol phosphate metabolism),ko04070(Phosphatidylinositol signaling system),ko04115(p53 signaling pathway),ko04510(Focal adhesion),ko04530(Tight junction),ko05200(Pathways in cancer),ko05213(Endometrial cancer),ko05214(Glioma),ko05215(Prostate cancer),ko05218(Melanoma),ko05222(Small cell lung cancer)
NM_000314	hsa	5728	PTEN	phosphatase and tensin homolog	miR-181d	1	1	2	GO:0000079(regulation of cyclin-dependent protein kinase activity),GO:0000287(magnesium ion binding),GO:0001525(angiogenesis),GO:0004438(phosphatidylinositol-3-phosphatase activity),GO:0004722(protein serine/threonine phosphatase activity),GO:0004725(protein tyrosine phosphatase activity),GO:0005161(platelet-derived growth factor receptor binding),GO:0005515(protein binding),GO:0005634(nucleus),G…	ko00562(Inositol phosphate metabolism),ko04070(Phosphatidylinositol signaling system),ko04115(p53 signaling pathway),ko04510(Focal adhesion),ko04530(Tight junction),ko05200(Pathways in cancer),ko05213(Endometrial cancer),ko05214(Glioma),ko05215(Prostate cancer),ko05218(Melanoma),ko05222(Small cell lung cancer)
NM_000314	hsa	5728	PTEN	phosphatase and tensin homolog	miR-19b	1	1	2	GO:0000079(regulation of cyclin-dependent protein kinase activity),GO:0000287(magnesium ion binding),GO:0001525(angiogenesis),GO:0004438(phosphatidylinositol-3-phosphatase activity),GO:0004722(protein serine/threonine phosphatase activity),GO:0004725(protein tyrosine phosphatase activity),GO:0005161(platelet-derived growth factor receptor binding),GO:0005515(protein binding),GO:0005634(nucleus),G…	ko00562(Inositol phosphate metabolism),ko04070(Phosphatidylinositol signaling system),ko04115(p53 signaling pathway),ko04510(Focal adhesion),ko04530(Tight junction),ko05200(Pathways in cancer),ko05213(Endometrial cancer),ko05214(Glioma),ko05215(Prostate cancer),ko05218(Melanoma),ko05222(Small cell lung cancer)
NM_000314	hsa	5728	PTEN	phosphatase and tensin homolog	miR-23c	1	1	2	GO:0000079(regulation of cyclin-dependent protein kinase activity),GO:0000287(magnesium ion binding),GO:0001525(angiogenesis),GO:0004438(phosphatidylinositol-3-phosphatase activity),GO:0004722(protein serine/threonine phosphatase activity),GO:0004725(protein tyrosine phosphatase activity),GO:0005161(platelet-derived growth factor receptor binding),GO:0005515(protein binding),GO:0005634(nucleus),G…	ko00562(Inositol phosphate metabolism),ko04070(Phosphatidylinositol signaling system),ko04115(p53 signaling pathway),ko04510(Focal adhesion),ko04530(Tight junction),ko05200(Pathways in cancer),ko05213(Endometrial cancer),ko05214(Glioma),ko05215(Prostate cancer),ko05218(Melanoma),ko05222(Small cell lung cancer)
NM_000314	hsa	5728	PTEN	phosphatase and tensin homolog	miR-320a	1	1	2	GO:0000079(regulation of cyclin-dependent protein kinase activity),GO:0000287(magnesium ion binding),GO:0001525(angiogenesis),GO:0004438(phosphatidylinositol-3-phosphatase activity),GO:0004722(protein serine/threonine phosphatase activity),GO:0004725(protein tyrosine phosphatase activity),GO:0005161(platelet-derived growth factor receptor binding),GO:0005515(protein binding),GO:0005634(nucleus),G…	ko00562(Inositol phosphate metabolism),ko04070(Phosphatidylinositol signaling system),ko04115(p53 signaling pathway),ko04510(Focal adhesion),ko04530(Tight junction),ko05200(Pathways in cancer),ko05213(Endometrial cancer),ko05214(Glioma),ko05215(Prostate cancer),ko05218(Melanoma),ko05222(Small cell lung cancer)
NM_000314	hsa	5728	PTEN	phosphatase and tensin homolog	miR-320b	1	1	2	GO:0000079(regulation of cyclin-dependent protein kinase activity),GO:0000287(magnesium ion binding),GO:0001525(angiogenesis),GO:0004438(phosphatidylinositol-3-phosphatase activity),GO:0004722(protein serine/threonine phosphatase activity),GO:0004725(protein tyrosine phosphatase activity),GO:0005161(platelet-derived growth factor receptor binding),GO:0005515(protein binding),GO:0005634(nucleus),G…	ko00562(Inositol phosphate metabolism),ko04070(Phosphatidylinositol signaling system),ko04115(p53 signaling pathway),ko04510(Focal adhesion),ko04530(Tight junction),ko05200(Pathways in cancer),ko05213(Endometrial cancer),ko05214(Glioma),ko05215(Prostate cancer),ko05218(Melanoma),ko05222(Small cell lung cancer)
NM_000314	hsa	5728	PTEN	phosphatase and tensin homolog	miR-320c	1	1	2	GO:0000079(regulation of cyclin-dependent protein kinase activity),GO:0000287(magnesium ion binding),GO:0001525(angiogenesis),GO:0004438(phosphatidylinositol-3-phosphatase activity),GO:0004722(protein serine/threonine phosphatase activity),GO:0004725(protein tyrosine phosphatase activity),GO:0005161(platelet-derived growth factor receptor binding),GO:0005515(protein binding),GO:0005634(nucleus),G…	ko00562(Inositol phosphate metabolism),ko04070(Phosphatidylinositol signaling system),ko04115(p53 signaling pathway),ko04510(Focal adhesion),ko04530(Tight junction),ko05200(Pathways in cancer),ko05213(Endometrial cancer),ko05214(Glioma),ko05215(Prostate cancer),ko05218(Melanoma),ko05222(Small cell lung cancer)
NM_000314	hsa	5728	PTEN	phosphatase and tensin homolog	miR-4534	1	1	2	GO:0000079(regulation of cyclin-dependent protein kinase activity),GO:0000287(magnesium ion binding),GO:0001525(angiogenesis),GO:0004438(phosphatidylinositol-3-phosphatase activity),GO:0004722(protein serine/threonine phosphatase activity),GO:0004725(protein tyrosine phosphatase activity),GO:0005161(platelet-derived growth factor receptor binding),GO:0005515(protein binding),GO:0005634(nucleus),G…	ko00562(Inositol phosphate metabolism),ko04070(Phosphatidylinositol signaling system),ko04115(p53 signaling pathway),ko04510(Focal adhesion),ko04530(Tight junction),ko05200(Pathways in cancer),ko05213(Endometrial cancer),ko05214(Glioma),ko05215(Prostate cancer),ko05218(Melanoma),ko05222(Small cell lung cancer)
NM_000314	hsa	5728	PTEN	phosphatase and tensin homolog	miR-4687-3p	1	1	2	GO:0000079(regulation of cyclin-dependent protein kinase activity),GO:0000287(magnesium ion binding),GO:0001525(angiogenesis),GO:0004438(phosphatidylinositol-3-phosphatase activity),GO:0004722(protein serine/threonine phosphatase activity),GO:0004725(protein tyrosine phosphatase activity),GO:0005161(platelet-derived growth factor receptor binding),GO:0005515(protein binding),GO:0005634(nucleus),G…	ko00562(Inositol phosphate metabolism),ko04070(Phosphatidylinositol signaling system),ko04115(p53 signaling pathway),ko04510(Focal adhesion),ko04530(Tight junction),ko05200(Pathways in cancer),ko05213(Endometrial cancer),ko05214(Glioma),ko05215(Prostate cancer),ko05218(Melanoma),ko05222(Small cell lung cancer)
NM_000314	hsa	5728	PTEN	phosphatase and tensin homolog	miR-494	1	1	2	GO:0000079(regulation of cyclin-dependent protein kinase activity),GO:0000287(magnesium ion binding),GO:0001525(angiogenesis),GO:0004438(phosphatidylinositol-3-phosphatase activity),GO:0004722(protein serine/threonine phosphatase activity),GO:0004725(protein tyrosine phosphatase activity),GO:0005161(platelet-derived growth factor receptor binding),GO:0005515(protein binding),GO:0005634(nucleus),G…	ko00562(Inositol phosphate metabolism),ko04070(Phosphatidylinositol signaling system),ko04115(p53 signaling pathway),ko04510(Focal adhesion),ko04530(Tight junction),ko05200(Pathways in cancer),ko05213(Endometrial cancer),ko05214(Glioma),ko05215(Prostate cancer),ko05218(Melanoma),ko05222(Small cell lung cancer)
NM_000315	hsa	5741	PTH	parathyroid hormone	miR-103a	1	1	2	GO:0001501(skeletal system development),GO:0005179(hormone activity),GO:0005576(extracellular region),GO:0005615(extracellular space),GO:0006874(cellular calcium ion homeostasis),GO:0007186(G-protein coupled receptor protein signaling pathway),GO:0007189(activation of adenylate cyclase activity by G-protein signaling pathway),GO:0007266(Rho protein signal transduction),GO:0007267(cell-cell signal…	ko04080(Neuroactive ligand-receptor interaction)
NM_000315	hsa	5741	PTH	parathyroid hormone	miR-107	1	1	2	GO:0001501(skeletal system development),GO:0005179(hormone activity),GO:0005576(extracellular region),GO:0005615(extracellular space),GO:0006874(cellular calcium ion homeostasis),GO:0007186(G-protein coupled receptor protein signaling pathway),GO:0007189(activation of adenylate cyclase activity by G-protein signaling pathway),GO:0007266(Rho protein signal transduction),GO:0007267(cell-cell signal…	ko04080(Neuroactive ligand-receptor interaction)
NM_000315	hsa	5741	PTH	parathyroid hormone	miR-1246	1	1	2	GO:0001501(skeletal system development),GO:0005179(hormone activity),GO:0005576(extracellular region),GO:0005615(extracellular space),GO:0006874(cellular calcium ion homeostasis),GO:0007186(G-protein coupled receptor protein signaling pathway),GO:0007189(activation of adenylate cyclase activity by G-protein signaling pathway),GO:0007266(Rho protein signal transduction),GO:0007267(cell-cell signal…	ko04080(Neuroactive ligand-receptor interaction)
NM_000318	hsa	5828	PXMP3	peroxisomal membrane protein 3, 35kDa	miR-23c	1	1	2	GO:0001764(neuron migration),GO:0005515(protein binding),GO:0005624(membrane fraction),GO:0005777(peroxisome),GO:0005778(peroxisomal membrane),GO:0005779(integral to peroxisomal membrane),GO:0007031(peroxisome organization),GO:0007399(nervous system development),GO:0008270(zinc ion binding),GO:0016020(membrane),GO:0016021(integral to membrane),GO:0046872(metal ion binding)
NM_000318	hsa	5828	PXMP3	peroxisomal membrane protein 3, 35kDa	miR-320a	1	1	2	GO:0001764(neuron migration),GO:0005515(protein binding),GO:0005624(membrane fraction),GO:0005777(peroxisome),GO:0005778(peroxisomal membrane),GO:0005779(integral to peroxisomal membrane),GO:0007031(peroxisome organization),GO:0007399(nervous system development),GO:0008270(zinc ion binding),GO:0016020(membrane),GO:0016021(integral to membrane),GO:0046872(metal ion binding)
NM_000318	hsa	5828	PXMP3	peroxisomal membrane protein 3, 35kDa	miR-320b	1	1	2	GO:0001764(neuron migration),GO:0005515(protein binding),GO:0005624(membrane fraction),GO:0005777(peroxisome),GO:0005778(peroxisomal membrane),GO:0005779(integral to peroxisomal membrane),GO:0007031(peroxisome organization),GO:0007399(nervous system development),GO:0008270(zinc ion binding),GO:0016020(membrane),GO:0016021(integral to membrane),GO:0046872(metal ion binding)
NM_000318	hsa	5828	PXMP3	peroxisomal membrane protein 3, 35kDa	miR-320c	1	1	2	GO:0001764(neuron migration),GO:0005515(protein binding),GO:0005624(membrane fraction),GO:0005777(peroxisome),GO:0005778(peroxisomal membrane),GO:0005779(integral to peroxisomal membrane),GO:0007031(peroxisome organization),GO:0007399(nervous system development),GO:0008270(zinc ion binding),GO:0016020(membrane),GO:0016021(integral to membrane),GO:0046872(metal ion binding)
NM_000319	hsa	5830	PEX5	peroxisomal biogenesis factor 5	miR-1260b	1	1	2	GO:0000038(very-long-chain fatty acid metabolic process),GO:0001764(neuron migration),GO:0005737(cytoplasm),GO:0005777(peroxisome),GO:0005778(peroxisomal membrane),GO:0006635(fatty acid beta-oxidation),GO:0007006(mitochondrial membrane organization),GO:0007029(endoplasmic reticulum organization),GO:0007031(peroxisome organization),GO:0015031(protein transport),GO:0016020(membrane),GO:0019898(extr…
NM_000319	hsa	5830	PEX5	peroxisomal biogenesis factor 5	miR-494	1	1	2	GO:0000038(very-long-chain fatty acid metabolic process),GO:0001764(neuron migration),GO:0005737(cytoplasm),GO:0005777(peroxisome),GO:0005778(peroxisomal membrane),GO:0006635(fatty acid beta-oxidation),GO:0007006(mitochondrial membrane organization),GO:0007029(endoplasmic reticulum organization),GO:0007031(peroxisome organization),GO:0015031(protein transport),GO:0016020(membrane),GO:0019898(extr…
NM_000320	hsa	5860	QDPR	quinoid dihydropteridine reductase	miR-181d	1	1	2	GO:0004155(6,7-dihydropteridine reductase activity),GO:0005488(binding),GO:0005737(cytoplasm),GO:0006520(cellular amino acid metabolic process),GO:0006729(tetrahydrobiopterin biosynthetic process),GO:0009055(electron carrier activity),GO:0016491(oxidoreductase activity),GO:0051066(dihydrobiopterin metabolic process),GO:0055114(oxidation reduction)	ko00790(Folate biosynthesis),ko01100(Metabolic pathways)
NM_000320	hsa	5860	QDPR	quinoid dihydropteridine reductase	miR-3665	1	1	2	GO:0004155(6,7-dihydropteridine reductase activity),GO:0005488(binding),GO:0005737(cytoplasm),GO:0006520(cellular amino acid metabolic process),GO:0006729(tetrahydrobiopterin biosynthetic process),GO:0009055(electron carrier activity),GO:0016491(oxidoreductase activity),GO:0051066(dihydrobiopterin metabolic process),GO:0055114(oxidation reduction)	ko00790(Folate biosynthesis),ko01100(Metabolic pathways)
NM_000321	hsa	5925	RB1	retinoblastoma 1	miR-494	1	1	2	GO:0000075(cell cycle checkpoint),GO:0000083(regulation of transcription involved in G1/S-phase of mitotic cell cycle),GO:0000122(negative regulation of transcription from RNA polymerase II promoter),GO:0000279(M phase),GO:0000785(chromatin),GO:0003700(transcription factor activity),GO:0003713(transcription coactivator activity),GO:0005634(nucleus),GO:0005654(nucleoplasm),GO:0005819(spindle),GO:0…	ko04110(Cell cycle),ko05200(Pathways in cancer),ko05212(Pancreatic cancer),ko05214(Glioma),ko05215(Prostate cancer),ko05218(Melanoma),ko05219(Bladder cancer),ko05220(Chronic myeloid leukemia),ko05222(Small cell lung cancer),ko05223(Non-small cell lung cancer)
NM_000322	hsa	5961	PRPH2	peripherin 2 (retinal degeneration, slow)	miR-23c	1	1	2	GO:0005515(protein binding),GO:0007155(cell adhesion),GO:0007601(visual perception),GO:0016020(membrane),GO:0016021(integral to membrane),GO:0050896(response to stimulus),GO:0060041(retina development in camera-type eye)	ko05014(Amyotrophic lateral sclerosis (ALS))
NM_000322	hsa	5961	PRPH2	peripherin 2 (retinal degeneration, slow)	miR-3591-3p	1	1	2	GO:0005515(protein binding),GO:0007155(cell adhesion),GO:0007601(visual perception),GO:0016020(membrane),GO:0016021(integral to membrane),GO:0050896(response to stimulus),GO:0060041(retina development in camera-type eye)	ko05014(Amyotrophic lateral sclerosis (ALS))
NM_000322	hsa	5961	PRPH2	peripherin 2 (retinal degeneration, slow)	miR-4530	1	1	2	GO:0005515(protein binding),GO:0007155(cell adhesion),GO:0007601(visual perception),GO:0016020(membrane),GO:0016021(integral to membrane),GO:0050896(response to stimulus),GO:0060041(retina development in camera-type eye)	ko05014(Amyotrophic lateral sclerosis (ALS))
NM_000322	hsa	5961	PRPH2	peripherin 2 (retinal degeneration, slow)	miR-5096	1	1	2	GO:0005515(protein binding),GO:0007155(cell adhesion),GO:0007601(visual perception),GO:0016020(membrane),GO:0016021(integral to membrane),GO:0050896(response to stimulus),GO:0060041(retina development in camera-type eye)	ko05014(Amyotrophic lateral sclerosis (ALS))
NM_000325	hsa	5308	PITX2	paired-like homeodomain 2	miR-494	1	1	2	GO:0003700(transcription factor activity),GO:0005634(nucleus),GO:0005667(transcription factor complex),GO:0006355(regulation of transcription, DNA-dependent),GO:0007275(multicellular organismal development),GO:0007368(determination of left/right symmetry),GO:0008134(transcription factor binding),GO:0009887(organ morphogenesis),GO:0043565(sequence-specific DNA binding)	ko04350(TGF-beta signaling pathway)
NM_000326	hsa	6017	RLBP1	retinaldehyde binding protein 1	miR-3665	1	1	2	GO:0005215(transporter activity),GO:0005488(binding),GO:0005502(11-cis retinal binding),GO:0005622(intracellular),GO:0005625(soluble fraction),GO:0005737(cytoplasm),GO:0006776(vitamin A metabolic process),GO:0006810(transport),GO:0007601(visual perception),GO:0019841(retinol binding),GO:0050896(response to stimulus)
NM_000327	hsa	6094	ROM1	retinal outer segment membrane protein 1	miR-720	1	1	2	GO:0005515(protein binding),GO:0005887(integral to plasma membrane),GO:0007155(cell adhesion),GO:0007601(visual perception),GO:0016020(membrane),GO:0050896(response to stimulus)
NM_000329	hsa	6121	RPE65	retinal pigment epithelium-specific protein 65kDa	miR-181d	1	1	2	GO:0004744(retinal isomerase activity),GO:0005506(iron ion binding),GO:0005515(protein binding),GO:0005737(cytoplasm),GO:0005886(plasma membrane),GO:0007468(regulation of rhodopsin gene expression),GO:0007601(visual perception),GO:0008286(insulin receptor signaling pathway),GO:0016787(hydrolase activity),GO:0016853(isomerase activity),GO:0031225(anchored to membrane),GO:0042574(retinal metabolic …	ko00830(Retinol metabolism)
NM_000330	hsa	6247	RS1	retinoschisin 1	miR-103a	1	1	2	GO:0005515(protein binding),GO:0005576(extracellular region),GO:0005615(extracellular space),GO:0007155(cell adhesion),GO:0007275(multicellular organismal development),GO:0007601(visual perception),GO:0050896(response to stimulus)
NM_000330	hsa	6247	RS1	retinoschisin 1	miR-107	1	1	2	GO:0005515(protein binding),GO:0005576(extracellular region),GO:0005615(extracellular space),GO:0007155(cell adhesion),GO:0007275(multicellular organismal development),GO:0007601(visual perception),GO:0050896(response to stimulus)
NM_000330	hsa	6247	RS1	retinoschisin 1	miR-4324	1	1	2	GO:0005515(protein binding),GO:0005576(extracellular region),GO:0005615(extracellular space),GO:0007155(cell adhesion),GO:0007275(multicellular organismal development),GO:0007601(visual perception),GO:0050896(response to stimulus)
NM_000331	hsa	6288	SAA1	serum amyloid A1	miR-4324	1	1	2	GO:0001664(G-protein-coupled receptor binding),GO:0005576(extracellular region),GO:0006953(acute-phase response),GO:0007204(elevation of cytosolic calcium ion concentration),GO:0030168(platelet activation),GO:0030593(neutrophil chemotaxis),GO:0034364(high-density lipoprotein particle),GO:0045785(positive regulation of cell adhesion),GO:0048246(macrophage chemotaxis),GO:0048247(lymphocyte chemotax…
NM_000332	hsa	6310	ATXN1	ataxin 1	miR-103a	1	1	2	GO:0003723(RNA binding),GO:0005634(nucleus),GO:0005654(nucleoplasm),GO:0005730(nucleolus),GO:0005737(cytoplasm),GO:0006396(RNA processing),GO:0008022(protein C-terminus binding),GO:0008219(cell death),GO:0008266(poly(U) RNA binding),GO:0016363(nuclear matrix),GO:0016481(negative regulation of transcription),GO:0016564(transcription repressor activity),GO:0034046(poly(G) RNA binding),GO:0042272(nu…
NM_000332	hsa	6310	ATXN1	ataxin 1	miR-107	1	1	2	GO:0003723(RNA binding),GO:0005634(nucleus),GO:0005654(nucleoplasm),GO:0005730(nucleolus),GO:0005737(cytoplasm),GO:0006396(RNA processing),GO:0008022(protein C-terminus binding),GO:0008219(cell death),GO:0008266(poly(U) RNA binding),GO:0016363(nuclear matrix),GO:0016481(negative regulation of transcription),GO:0016564(transcription repressor activity),GO:0034046(poly(G) RNA binding),GO:0042272(nu…
NM_000332	hsa	6310	ATXN1	ataxin 1	miR-19b	1	1	2	GO:0003723(RNA binding),GO:0005634(nucleus),GO:0005654(nucleoplasm),GO:0005730(nucleolus),GO:0005737(cytoplasm),GO:0006396(RNA processing),GO:0008022(protein C-terminus binding),GO:0008219(cell death),GO:0008266(poly(U) RNA binding),GO:0016363(nuclear matrix),GO:0016481(negative regulation of transcription),GO:0016564(transcription repressor activity),GO:0034046(poly(G) RNA binding),GO:0042272(nu…
NM_000332	hsa	6310	ATXN1	ataxin 1	miR-23c	1	1	2	GO:0003723(RNA binding),GO:0005634(nucleus),GO:0005654(nucleoplasm),GO:0005730(nucleolus),GO:0005737(cytoplasm),GO:0006396(RNA processing),GO:0008022(protein C-terminus binding),GO:0008219(cell death),GO:0008266(poly(U) RNA binding),GO:0016363(nuclear matrix),GO:0016481(negative regulation of transcription),GO:0016564(transcription repressor activity),GO:0034046(poly(G) RNA binding),GO:0042272(nu…
NM_000332	hsa	6310	ATXN1	ataxin 1	miR-30b	1	1	2	GO:0003723(RNA binding),GO:0005634(nucleus),GO:0005654(nucleoplasm),GO:0005730(nucleolus),GO:0005737(cytoplasm),GO:0006396(RNA processing),GO:0008022(protein C-terminus binding),GO:0008219(cell death),GO:0008266(poly(U) RNA binding),GO:0016363(nuclear matrix),GO:0016481(negative regulation of transcription),GO:0016564(transcription repressor activity),GO:0034046(poly(G) RNA binding),GO:0042272(nu…
NM_000333	hsa	6314	ATXN7	ataxin 7	miR-181d	1	1	2	GO:0005515(protein binding),GO:0005622(intracellular),GO:0005634(nucleus),GO:0005730(nucleolus),GO:0005737(cytoplasm),GO:0006997(nucleus organization),GO:0007601(visual perception),GO:0008219(cell death),GO:0008270(zinc ion binding),GO:0016363(nuclear matrix),GO:0016578(histone deubiquitination),GO:0045449(regulation of transcription)
NM_000333	hsa	6314	ATXN7	ataxin 7	miR-19b	1	1	2	GO:0005515(protein binding),GO:0005622(intracellular),GO:0005634(nucleus),GO:0005730(nucleolus),GO:0005737(cytoplasm),GO:0006997(nucleus organization),GO:0007601(visual perception),GO:0008219(cell death),GO:0008270(zinc ion binding),GO:0016363(nuclear matrix),GO:0016578(histone deubiquitination),GO:0045449(regulation of transcription)
NM_000333	hsa	6314	ATXN7	ataxin 7	miR-23c	1	1	2	GO:0005515(protein binding),GO:0005622(intracellular),GO:0005634(nucleus),GO:0005730(nucleolus),GO:0005737(cytoplasm),GO:0006997(nucleus organization),GO:0007601(visual perception),GO:0008219(cell death),GO:0008270(zinc ion binding),GO:0016363(nuclear matrix),GO:0016578(histone deubiquitination),GO:0045449(regulation of transcription)
NM_000333	hsa	6314	ATXN7	ataxin 7	miR-4455	1	1	2	GO:0005515(protein binding),GO:0005622(intracellular),GO:0005634(nucleus),GO:0005730(nucleolus),GO:0005737(cytoplasm),GO:0006997(nucleus organization),GO:0007601(visual perception),GO:0008219(cell death),GO:0008270(zinc ion binding),GO:0016363(nuclear matrix),GO:0016578(histone deubiquitination),GO:0045449(regulation of transcription)
NM_000334	hsa	6329	SCN4A	sodium channel, voltage-gated, type IV, alpha subunit	miR-3665	1	1	2	GO:0001518(voltage-gated sodium channel complex),GO:0005244(voltage-gated ion channel activity),GO:0005248(voltage-gated sodium channel activity),GO:0006811(ion transport),GO:0006814(sodium ion transport),GO:0006936(muscle contraction),GO:0016020(membrane),GO:0031402(sodium ion binding),GO:0055085(transmembrane transport)
NM_000334	hsa	6329	SCN4A	sodium channel, voltage-gated, type IV, alpha subunit	miR-4443	1	1	2	GO:0001518(voltage-gated sodium channel complex),GO:0005244(voltage-gated ion channel activity),GO:0005248(voltage-gated sodium channel activity),GO:0006811(ion transport),GO:0006814(sodium ion transport),GO:0006936(muscle contraction),GO:0016020(membrane),GO:0031402(sodium ion binding),GO:0055085(transmembrane transport)
NM_000334	hsa	6329	SCN4A	sodium channel, voltage-gated, type IV, alpha subunit	miR-4455	1	1	2	GO:0001518(voltage-gated sodium channel complex),GO:0005244(voltage-gated ion channel activity),GO:0005248(voltage-gated sodium channel activity),GO:0006811(ion transport),GO:0006814(sodium ion transport),GO:0006936(muscle contraction),GO:0016020(membrane),GO:0031402(sodium ion binding),GO:0055085(transmembrane transport)
NM_000335	hsa	6331	SCN5A	sodium channel, voltage-gated, type V, alpha subunit	miR-1260b	1	1	2	GO:0001518(voltage-gated sodium channel complex),GO:0005244(voltage-gated ion channel activity),GO:0005248(voltage-gated sodium channel activity),GO:0005515(protein binding),GO:0006811(ion transport),GO:0006814(sodium ion transport),GO:0006936(muscle contraction),GO:0008015(blood circulation),GO:0008016(regulation of heart contraction),GO:0014704(intercalated disc),GO:0016021(integral to membrane…
NM_000337	hsa	6444	SGCD	sarcoglycan, delta (35kDa dystrophin-associated glycoprotein)	miR-1246	1	1	2	GO:0005515(protein binding),GO:0005737(cytoplasm),GO:0005856(cytoskeleton),GO:0005886(plasma membrane),GO:0007010(cytoskeleton organization),GO:0007517(muscle organ development),GO:0016012(sarcoglycan complex),GO:0016021(integral to membrane)	ko05410(Hypertrophic cardiomyopathy (HCM)),ko05412(Arrhythmogenic right ventricular cardiomyopathy (ARVC)),ko05414(Dilated cardiomyopathy),ko05416(Viral myocarditis)
NM_000337	hsa	6444	SGCD	sarcoglycan, delta (35kDa dystrophin-associated glycoprotein)	miR-1260b	1	1	2	GO:0005515(protein binding),GO:0005737(cytoplasm),GO:0005856(cytoskeleton),GO:0005886(plasma membrane),GO:0007010(cytoskeleton organization),GO:0007517(muscle organ development),GO:0016012(sarcoglycan complex),GO:0016021(integral to membrane)	ko05410(Hypertrophic cardiomyopathy (HCM)),ko05412(Arrhythmogenic right ventricular cardiomyopathy (ARVC)),ko05414(Dilated cardiomyopathy),ko05416(Viral myocarditis)
NM_000337	hsa	6444	SGCD	sarcoglycan, delta (35kDa dystrophin-associated glycoprotein)	miR-4687-3p	1	1	2	GO:0005515(protein binding),GO:0005737(cytoplasm),GO:0005856(cytoskeleton),GO:0005886(plasma membrane),GO:0007010(cytoskeleton organization),GO:0007517(muscle organ development),GO:0016012(sarcoglycan complex),GO:0016021(integral to membrane)	ko05410(Hypertrophic cardiomyopathy (HCM)),ko05412(Arrhythmogenic right ventricular cardiomyopathy (ARVC)),ko05414(Dilated cardiomyopathy),ko05416(Viral myocarditis)
NM_000338	hsa	6557	SLC12A1	solute carrier family 12 (sodium/potassium/chloride transporters), member 1	miR-23c	1	1	2	GO:0005215(transporter activity),GO:0005624(membrane fraction),GO:0005886(plasma membrane),GO:0006811(ion transport),GO:0006813(potassium ion transport),GO:0006814(sodium ion transport),GO:0006821(chloride transport),GO:0008511(sodium:potassium:chloride symporter activity),GO:0015293(symporter activity),GO:0016021(integral to membrane),GO:0030955(potassium ion binding),GO:0031402(sodium ion bindi…
NM_000339	hsa	6559	SLC12A3	solute carrier family 12 (sodium/chloride transporters), member 3	miR-1260b	1	1	2	GO:0005215(transporter activity),GO:0005624(membrane fraction),GO:0005829(cytosol),GO:0005886(plasma membrane),GO:0005887(integral to plasma membrane),GO:0006811(ion transport),GO:0006814(sodium ion transport),GO:0006821(chloride transport),GO:0015293(symporter activity),GO:0015378(sodium:chloride symporter activity),GO:0016324(apical plasma membrane),GO:0031402(sodium ion binding),GO:0031982(ves…
NM_000339	hsa	6559	SLC12A3	solute carrier family 12 (sodium/chloride transporters), member 3	miR-3665	1	1	2	GO:0005215(transporter activity),GO:0005624(membrane fraction),GO:0005829(cytosol),GO:0005886(plasma membrane),GO:0005887(integral to plasma membrane),GO:0006811(ion transport),GO:0006814(sodium ion transport),GO:0006821(chloride transport),GO:0015293(symporter activity),GO:0015378(sodium:chloride symporter activity),GO:0016324(apical plasma membrane),GO:0031402(sodium ion binding),GO:0031982(ves…
NM_000339	hsa	6559	SLC12A3	solute carrier family 12 (sodium/chloride transporters), member 3	miR-4324	1	1	2	GO:0005215(transporter activity),GO:0005624(membrane fraction),GO:0005829(cytosol),GO:0005886(plasma membrane),GO:0005887(integral to plasma membrane),GO:0006811(ion transport),GO:0006814(sodium ion transport),GO:0006821(chloride transport),GO:0015293(symporter activity),GO:0015378(sodium:chloride symporter activity),GO:0016324(apical plasma membrane),GO:0031402(sodium ion binding),GO:0031982(ves…
NM_000339	hsa	6559	SLC12A3	solute carrier family 12 (sodium/chloride transporters), member 3	miR-4443	1	1	2	GO:0005215(transporter activity),GO:0005624(membrane fraction),GO:0005829(cytosol),GO:0005886(plasma membrane),GO:0005887(integral to plasma membrane),GO:0006811(ion transport),GO:0006814(sodium ion transport),GO:0006821(chloride transport),GO:0015293(symporter activity),GO:0015378(sodium:chloride symporter activity),GO:0016324(apical plasma membrane),GO:0031402(sodium ion binding),GO:0031982(ves…
NM_000339	hsa	6559	SLC12A3	solute carrier family 12 (sodium/chloride transporters), member 3	miR-5096	1	1	2	GO:0005215(transporter activity),GO:0005624(membrane fraction),GO:0005829(cytosol),GO:0005886(plasma membrane),GO:0005887(integral to plasma membrane),GO:0006811(ion transport),GO:0006814(sodium ion transport),GO:0006821(chloride transport),GO:0015293(symporter activity),GO:0015378(sodium:chloride symporter activity),GO:0016324(apical plasma membrane),GO:0031402(sodium ion binding),GO:0031982(ves…
NM_000339	hsa	6559	SLC12A3	solute carrier family 12 (sodium/chloride transporters), member 3	miR-720	1	1	2	GO:0005215(transporter activity),GO:0005624(membrane fraction),GO:0005829(cytosol),GO:0005886(plasma membrane),GO:0005887(integral to plasma membrane),GO:0006811(ion transport),GO:0006814(sodium ion transport),GO:0006821(chloride transport),GO:0015293(symporter activity),GO:0015378(sodium:chloride symporter activity),GO:0016324(apical plasma membrane),GO:0031402(sodium ion binding),GO:0031982(ves…
NM_000340	hsa	6514	SLC2A2	solute carrier family 2 (facilitated glucose transporter), member 2	miR-320a	1	1	2	GO:0005158(insulin receptor binding),GO:0005215(transporter activity),GO:0005624(membrane fraction),GO:0005768(endosome),GO:0005829(cytosol),GO:0005886(plasma membrane),GO:0005887(integral to plasma membrane),GO:0005975(carbohydrate metabolic process),GO:0007587(sugar utilization),GO:0008643(carbohydrate transport),GO:0015755(fructose transport),GO:0015758(glucose transport),GO:0016323(basolatera…	ko04930(Type II diabetes mellitus),ko04950(Maturity onset diabetes of the young)
NM_000340	hsa	6514	SLC2A2	solute carrier family 2 (facilitated glucose transporter), member 2	miR-320b	1	1	2	GO:0005158(insulin receptor binding),GO:0005215(transporter activity),GO:0005624(membrane fraction),GO:0005768(endosome),GO:0005829(cytosol),GO:0005886(plasma membrane),GO:0005887(integral to plasma membrane),GO:0005975(carbohydrate metabolic process),GO:0007587(sugar utilization),GO:0008643(carbohydrate transport),GO:0015755(fructose transport),GO:0015758(glucose transport),GO:0016323(basolatera…	ko04930(Type II diabetes mellitus),ko04950(Maturity onset diabetes of the young)
NM_000340	hsa	6514	SLC2A2	solute carrier family 2 (facilitated glucose transporter), member 2	miR-320c	1	1	2	GO:0005158(insulin receptor binding),GO:0005215(transporter activity),GO:0005624(membrane fraction),GO:0005768(endosome),GO:0005829(cytosol),GO:0005886(plasma membrane),GO:0005887(integral to plasma membrane),GO:0005975(carbohydrate metabolic process),GO:0007587(sugar utilization),GO:0008643(carbohydrate transport),GO:0015755(fructose transport),GO:0015758(glucose transport),GO:0016323(basolatera…	ko04930(Type II diabetes mellitus),ko04950(Maturity onset diabetes of the young)
NM_000341	hsa	6519	SLC3A1	solute carrier family 3 (cystine, dibasic and neutral amino acid transporters, activator of cystine, dibasic and neutral amino acid transport), member 1	miR-103a	1	1	2	GO:0003824(catalytic activity),GO:0005624(membrane fraction),GO:0005743(mitochondrial inner membrane),GO:0005774(vacuolar membrane),GO:0005886(plasma membrane),GO:0005887(integral to plasma membrane),GO:0005975(carbohydrate metabolic process),GO:0006520(cellular amino acid metabolic process),GO:0006810(transport),GO:0015174(basic amino acid transmembrane transporter activity),GO:0015184(L-cystine…
NM_000341	hsa	6519	SLC3A1	solute carrier family 3 (cystine, dibasic and neutral amino acid transporters, activator of cystine, dibasic and neutral amino acid transport), member 1	miR-107	1	1	2	GO:0003824(catalytic activity),GO:0005624(membrane fraction),GO:0005743(mitochondrial inner membrane),GO:0005774(vacuolar membrane),GO:0005886(plasma membrane),GO:0005887(integral to plasma membrane),GO:0005975(carbohydrate metabolic process),GO:0006520(cellular amino acid metabolic process),GO:0006810(transport),GO:0015174(basic amino acid transmembrane transporter activity),GO:0015184(L-cystine…
NM_000341	hsa	6519	SLC3A1	solute carrier family 3 (cystine, dibasic and neutral amino acid transporters, activator of cystine, dibasic and neutral amino acid transport), member 1	miR-181d	1	1	2	GO:0003824(catalytic activity),GO:0005624(membrane fraction),GO:0005743(mitochondrial inner membrane),GO:0005774(vacuolar membrane),GO:0005886(plasma membrane),GO:0005887(integral to plasma membrane),GO:0005975(carbohydrate metabolic process),GO:0006520(cellular amino acid metabolic process),GO:0006810(transport),GO:0015174(basic amino acid transmembrane transporter activity),GO:0015184(L-cystine…
NM_000342	hsa	6521	SLC4A1	solute carrier family 4, anion exchanger, member 1 (erythrocyte membrane protein band 3, Diego blood group)	miR-4530	1	1	2	GO:0003779(actin binding),GO:0005215(transporter activity),GO:0005452(inorganic anion exchanger activity),GO:0005887(integral to plasma membrane),GO:0006820(anion transport),GO:0006873(cellular ion homeostasis),GO:0008022(protein C-terminus binding),GO:0008509(anion transmembrane transporter activity),GO:0016020(membrane),GO:0016323(basolateral plasma membrane),GO:0030018(Z disc),GO:0030506(ankyr…
NM_000342	hsa	6521	SLC4A1	solute carrier family 4, anion exchanger, member 1 (erythrocyte membrane protein band 3, Diego blood group)	miR-4534	1	1	2	GO:0003779(actin binding),GO:0005215(transporter activity),GO:0005452(inorganic anion exchanger activity),GO:0005887(integral to plasma membrane),GO:0006820(anion transport),GO:0006873(cellular ion homeostasis),GO:0008022(protein C-terminus binding),GO:0008509(anion transmembrane transporter activity),GO:0016020(membrane),GO:0016323(basolateral plasma membrane),GO:0030018(Z disc),GO:0030506(ankyr…
NM_000342	hsa	6521	SLC4A1	solute carrier family 4, anion exchanger, member 1 (erythrocyte membrane protein band 3, Diego blood group)	miR-5096	1	1	2	GO:0003779(actin binding),GO:0005215(transporter activity),GO:0005452(inorganic anion exchanger activity),GO:0005887(integral to plasma membrane),GO:0006820(anion transport),GO:0006873(cellular ion homeostasis),GO:0008022(protein C-terminus binding),GO:0008509(anion transmembrane transporter activity),GO:0016020(membrane),GO:0016323(basolateral plasma membrane),GO:0030018(Z disc),GO:0030506(ankyr…
NM_000343	hsa	6523	SLC5A1	solute carrier family 5 (sodium/glucose cotransporter), member 1	miR-4324	1	1	2	GO:0001656(metanephros development),GO:0005215(transporter activity),GO:0005412(glucose:sodium symporter activity),GO:0005515(protein binding),GO:0005886(plasma membrane),GO:0005887(integral to plasma membrane),GO:0005911(cell-cell junction),GO:0006811(ion transport),GO:0006814(sodium ion transport),GO:0008643(carbohydrate transport),GO:0015293(symporter activity),GO:0015758(glucose transport),GO…
NM_000344	hsa	6606	SMN1	survival of motor neuron 1, telomeric	miR-181d	1	1	2
NM_000344	hsa	6606	SMN1	survival of motor neuron 1, telomeric	miR-23c	1	1	2
NM_000344	hsa	6606	SMN1	survival of motor neuron 1, telomeric	miR-494	1	1	2
NM_000345	hsa	6622	SNCA	synuclein, alpha (non A4 component of amyloid precursor)	miR-23c	1	1	2	GO:0000287(magnesium ion binding),GO:0001774(microglial cell activation),GO:0001921(positive regulation of receptor recycling),GO:0001956(positive regulation of neurotransmitter secretion),GO:0001963(synaptic transmission, dopaminergic),GO:0005504(fatty acid binding),GO:0005509(calcium ion binding),GO:0005634(nucleus),GO:0005737(cytoplasm),GO:0005829(cytosol),GO:0005886(plasma membrane),GO:000593…	ko05010(Alzheimer's disease),ko05012(Parkinson's disease)
NM_000345	hsa	6622	SNCA	synuclein, alpha (non A4 component of amyloid precursor)	miR-3665	1	1	2	GO:0000287(magnesium ion binding),GO:0001774(microglial cell activation),GO:0001921(positive regulation of receptor recycling),GO:0001956(positive regulation of neurotransmitter secretion),GO:0001963(synaptic transmission, dopaminergic),GO:0005504(fatty acid binding),GO:0005509(calcium ion binding),GO:0005634(nucleus),GO:0005737(cytoplasm),GO:0005829(cytosol),GO:0005886(plasma membrane),GO:000593…	ko05010(Alzheimer's disease),ko05012(Parkinson's disease)
NM_000345	hsa	6622	SNCA	synuclein, alpha (non A4 component of amyloid precursor)	miR-4277	1	1	2	GO:0000287(magnesium ion binding),GO:0001774(microglial cell activation),GO:0001921(positive regulation of receptor recycling),GO:0001956(positive regulation of neurotransmitter secretion),GO:0001963(synaptic transmission, dopaminergic),GO:0005504(fatty acid binding),GO:0005509(calcium ion binding),GO:0005634(nucleus),GO:0005737(cytoplasm),GO:0005829(cytosol),GO:0005886(plasma membrane),GO:000593…	ko05010(Alzheimer's disease),ko05012(Parkinson's disease)
NM_000345	hsa	6622	SNCA	synuclein, alpha (non A4 component of amyloid precursor)	miR-5096	1	1	2	GO:0000287(magnesium ion binding),GO:0001774(microglial cell activation),GO:0001921(positive regulation of receptor recycling),GO:0001956(positive regulation of neurotransmitter secretion),GO:0001963(synaptic transmission, dopaminergic),GO:0005504(fatty acid binding),GO:0005509(calcium ion binding),GO:0005634(nucleus),GO:0005737(cytoplasm),GO:0005829(cytosol),GO:0005886(plasma membrane),GO:000593…	ko05010(Alzheimer's disease),ko05012(Parkinson's disease)
NM_000346	hsa	6662	SOX9	SRY (sex determining region Y)-box 9	miR-494	1	1	2	GO:0001502(cartilage condensation),GO:0001708(cell fate specification),GO:0001837(epithelial to mesenchymal transition),GO:0001942(hair follicle development),GO:0003700(transcription factor activity),GO:0003704(specific RNA polymerase II transcription factor activity),GO:0005515(protein binding),GO:0005634(nucleus),GO:0005730(nucleolus),GO:0007507(heart development),GO:0008584(male gonad developm…
NM_000348	hsa	6716	SRD5A2	steroid-5-alpha-reductase, alpha polypeptide 2 (3-oxo-5 alpha-steroid delta 4-dehydrogenase alpha 2)	miR-103a	1	1	2	GO:0003865(3-oxo-5-alpha-steroid 4-dehydrogenase activity),GO:0005737(cytoplasm),GO:0005783(endoplasmic reticulum),GO:0005792(microsome),GO:0006629(lipid metabolic process),GO:0006702(androgen biosynthetic process),GO:0006706(steroid catabolic process),GO:0007267(cell-cell signaling),GO:0007548(sex differentiation),GO:0008584(male gonad development),GO:0009917(sterol 5-alpha reductase activity),G…	ko00150(Androgen and estrogen metabolism),ko05215(Prostate cancer)
NM_000348	hsa	6716	SRD5A2	steroid-5-alpha-reductase, alpha polypeptide 2 (3-oxo-5 alpha-steroid delta 4-dehydrogenase alpha 2)	miR-107	1	1	2	GO:0003865(3-oxo-5-alpha-steroid 4-dehydrogenase activity),GO:0005737(cytoplasm),GO:0005783(endoplasmic reticulum),GO:0005792(microsome),GO:0006629(lipid metabolic process),GO:0006702(androgen biosynthetic process),GO:0006706(steroid catabolic process),GO:0007267(cell-cell signaling),GO:0007548(sex differentiation),GO:0008584(male gonad development),GO:0009917(sterol 5-alpha reductase activity),G…	ko00150(Androgen and estrogen metabolism),ko05215(Prostate cancer)
NM_000348	hsa	6716	SRD5A2	steroid-5-alpha-reductase, alpha polypeptide 2 (3-oxo-5 alpha-steroid delta 4-dehydrogenase alpha 2)	miR-4324	1	1	2	GO:0003865(3-oxo-5-alpha-steroid 4-dehydrogenase activity),GO:0005737(cytoplasm),GO:0005783(endoplasmic reticulum),GO:0005792(microsome),GO:0006629(lipid metabolic process),GO:0006702(androgen biosynthetic process),GO:0006706(steroid catabolic process),GO:0007267(cell-cell signaling),GO:0007548(sex differentiation),GO:0008584(male gonad development),GO:0009917(sterol 5-alpha reductase activity),G…	ko00150(Androgen and estrogen metabolism),ko05215(Prostate cancer)
NM_000348	hsa	6716	SRD5A2	steroid-5-alpha-reductase, alpha polypeptide 2 (3-oxo-5 alpha-steroid delta 4-dehydrogenase alpha 2)	miR-4443	1	1	2	GO:0003865(3-oxo-5-alpha-steroid 4-dehydrogenase activity),GO:0005737(cytoplasm),GO:0005783(endoplasmic reticulum),GO:0005792(microsome),GO:0006629(lipid metabolic process),GO:0006702(androgen biosynthetic process),GO:0006706(steroid catabolic process),GO:0007267(cell-cell signaling),GO:0007548(sex differentiation),GO:0008584(male gonad development),GO:0009917(sterol 5-alpha reductase activity),G…	ko00150(Androgen and estrogen metabolism),ko05215(Prostate cancer)
NM_000349	hsa	6770	STAR	steroidogenic acute regulatory protein	miR-4534	1	1	2	GO:0005515(protein binding),GO:0005739(mitochondrion),GO:0005758(mitochondrial intermembrane space),GO:0005829(cytosol),GO:0006699(bile acid biosynthetic process),GO:0006869(lipid transport),GO:0007420(brain development),GO:0007584(response to nutrient),GO:0008211(glucocorticoid metabolic process),GO:0008289(lipid binding),GO:0010288(response to lead ion),GO:0014070(response to organic cyclic sub…
NM_000349	hsa	6770	STAR	steroidogenic acute regulatory protein	miR-5096	1	1	2	GO:0005515(protein binding),GO:0005739(mitochondrion),GO:0005758(mitochondrial intermembrane space),GO:0005829(cytosol),GO:0006699(bile acid biosynthetic process),GO:0006869(lipid transport),GO:0007420(brain development),GO:0007584(response to nutrient),GO:0008211(glucocorticoid metabolic process),GO:0008289(lipid binding),GO:0010288(response to lead ion),GO:0014070(response to organic cyclic sub…
NM_000350	hsa	24	ABCA4	ATP-binding cassette, sub-family A (ABC1), member 4	miR-4443	1	1	2	GO:0000166(nucleotide binding),GO:0004012(phospholipid-translocating ATPase activity),GO:0005215(transporter activity),GO:0005524(ATP binding),GO:0005548(phospholipid transporter activity),GO:0005624(membrane fraction),GO:0005887(integral to plasma membrane),GO:0006649(phospholipid transfer to membrane),GO:0006810(transport),GO:0007603(phototransduction, visible light),GO:0016020(membrane),GO:001…	ko02010(ABC transporters)
NM_000350	hsa	24	ABCA4	ATP-binding cassette, sub-family A (ABC1), member 4	miR-5096	1	1	2	GO:0000166(nucleotide binding),GO:0004012(phospholipid-translocating ATPase activity),GO:0005215(transporter activity),GO:0005524(ATP binding),GO:0005548(phospholipid transporter activity),GO:0005624(membrane fraction),GO:0005887(integral to plasma membrane),GO:0006649(phospholipid transfer to membrane),GO:0006810(transport),GO:0007603(phototransduction, visible light),GO:0016020(membrane),GO:001…	ko02010(ABC transporters)
NM_000351	hsa	412	STS	steroid sulfatase (microsomal), isozyme S	miR-103a	1	1	2	GO:0000299(integral to membrane of membrane fraction),GO:0004773(steryl-sulfatase activity),GO:0005509(calcium ion binding),GO:0005635(nuclear envelope),GO:0005764(lysosome),GO:0005768(endosome),GO:0005783(endoplasmic reticulum),GO:0005789(endoplasmic reticulum membrane),GO:0005792(microsome),GO:0005794(Golgi apparatus),GO:0005886(plasma membrane),GO:0006629(lipid metabolic process),GO:0006706(st…	ko00150(Androgen and estrogen metabolism)
NM_000351	hsa	412	STS	steroid sulfatase (microsomal), isozyme S	miR-107	1	1	2	GO:0000299(integral to membrane of membrane fraction),GO:0004773(steryl-sulfatase activity),GO:0005509(calcium ion binding),GO:0005635(nuclear envelope),GO:0005764(lysosome),GO:0005768(endosome),GO:0005783(endoplasmic reticulum),GO:0005789(endoplasmic reticulum membrane),GO:0005792(microsome),GO:0005794(Golgi apparatus),GO:0005886(plasma membrane),GO:0006629(lipid metabolic process),GO:0006706(st…	ko00150(Androgen and estrogen metabolism)
NM_000351	hsa	412	STS	steroid sulfatase (microsomal), isozyme S	miR-181d	1	1	2	GO:0000299(integral to membrane of membrane fraction),GO:0004773(steryl-sulfatase activity),GO:0005509(calcium ion binding),GO:0005635(nuclear envelope),GO:0005764(lysosome),GO:0005768(endosome),GO:0005783(endoplasmic reticulum),GO:0005789(endoplasmic reticulum membrane),GO:0005792(microsome),GO:0005794(Golgi apparatus),GO:0005886(plasma membrane),GO:0006629(lipid metabolic process),GO:0006706(st…	ko00150(Androgen and estrogen metabolism)
NM_000351	hsa	412	STS	steroid sulfatase (microsomal), isozyme S	miR-19b	1	1	2	GO:0000299(integral to membrane of membrane fraction),GO:0004773(steryl-sulfatase activity),GO:0005509(calcium ion binding),GO:0005635(nuclear envelope),GO:0005764(lysosome),GO:0005768(endosome),GO:0005783(endoplasmic reticulum),GO:0005789(endoplasmic reticulum membrane),GO:0005792(microsome),GO:0005794(Golgi apparatus),GO:0005886(plasma membrane),GO:0006629(lipid metabolic process),GO:0006706(st…	ko00150(Androgen and estrogen metabolism)
NM_000351	hsa	412	STS	steroid sulfatase (microsomal), isozyme S	miR-320a	1	1	2	GO:0000299(integral to membrane of membrane fraction),GO:0004773(steryl-sulfatase activity),GO:0005509(calcium ion binding),GO:0005635(nuclear envelope),GO:0005764(lysosome),GO:0005768(endosome),GO:0005783(endoplasmic reticulum),GO:0005789(endoplasmic reticulum membrane),GO:0005792(microsome),GO:0005794(Golgi apparatus),GO:0005886(plasma membrane),GO:0006629(lipid metabolic process),GO:0006706(st…	ko00150(Androgen and estrogen metabolism)
NM_000351	hsa	412	STS	steroid sulfatase (microsomal), isozyme S	miR-320b	1	1	2	GO:0000299(integral to membrane of membrane fraction),GO:0004773(steryl-sulfatase activity),GO:0005509(calcium ion binding),GO:0005635(nuclear envelope),GO:0005764(lysosome),GO:0005768(endosome),GO:0005783(endoplasmic reticulum),GO:0005789(endoplasmic reticulum membrane),GO:0005792(microsome),GO:0005794(Golgi apparatus),GO:0005886(plasma membrane),GO:0006629(lipid metabolic process),GO:0006706(st…	ko00150(Androgen and estrogen metabolism)
NM_000351	hsa	412	STS	steroid sulfatase (microsomal), isozyme S	miR-320c	1	1	2	GO:0000299(integral to membrane of membrane fraction),GO:0004773(steryl-sulfatase activity),GO:0005509(calcium ion binding),GO:0005635(nuclear envelope),GO:0005764(lysosome),GO:0005768(endosome),GO:0005783(endoplasmic reticulum),GO:0005789(endoplasmic reticulum membrane),GO:0005792(microsome),GO:0005794(Golgi apparatus),GO:0005886(plasma membrane),GO:0006629(lipid metabolic process),GO:0006706(st…	ko00150(Androgen and estrogen metabolism)
NM_000351	hsa	412	STS	steroid sulfatase (microsomal), isozyme S	miR-3665	1	1	2	GO:0000299(integral to membrane of membrane fraction),GO:0004773(steryl-sulfatase activity),GO:0005509(calcium ion binding),GO:0005635(nuclear envelope),GO:0005764(lysosome),GO:0005768(endosome),GO:0005783(endoplasmic reticulum),GO:0005789(endoplasmic reticulum membrane),GO:0005792(microsome),GO:0005794(Golgi apparatus),GO:0005886(plasma membrane),GO:0006629(lipid metabolic process),GO:0006706(st…	ko00150(Androgen and estrogen metabolism)
NM_000351	hsa	412	STS	steroid sulfatase (microsomal), isozyme S	miR-4443	1	1	2	GO:0000299(integral to membrane of membrane fraction),GO:0004773(steryl-sulfatase activity),GO:0005509(calcium ion binding),GO:0005635(nuclear envelope),GO:0005764(lysosome),GO:0005768(endosome),GO:0005783(endoplasmic reticulum),GO:0005789(endoplasmic reticulum membrane),GO:0005792(microsome),GO:0005794(Golgi apparatus),GO:0005886(plasma membrane),GO:0006629(lipid metabolic process),GO:0006706(st…	ko00150(Androgen and estrogen metabolism)
NM_000351	hsa	412	STS	steroid sulfatase (microsomal), isozyme S	miR-4530	1	1	2	GO:0000299(integral to membrane of membrane fraction),GO:0004773(steryl-sulfatase activity),GO:0005509(calcium ion binding),GO:0005635(nuclear envelope),GO:0005764(lysosome),GO:0005768(endosome),GO:0005783(endoplasmic reticulum),GO:0005789(endoplasmic reticulum membrane),GO:0005792(microsome),GO:0005794(Golgi apparatus),GO:0005886(plasma membrane),GO:0006629(lipid metabolic process),GO:0006706(st…	ko00150(Androgen and estrogen metabolism)
NM_000351	hsa	412	STS	steroid sulfatase (microsomal), isozyme S	miR-4534	1	1	2	GO:0000299(integral to membrane of membrane fraction),GO:0004773(steryl-sulfatase activity),GO:0005509(calcium ion binding),GO:0005635(nuclear envelope),GO:0005764(lysosome),GO:0005768(endosome),GO:0005783(endoplasmic reticulum),GO:0005789(endoplasmic reticulum membrane),GO:0005792(microsome),GO:0005794(Golgi apparatus),GO:0005886(plasma membrane),GO:0006629(lipid metabolic process),GO:0006706(st…	ko00150(Androgen and estrogen metabolism)
NM_000353	hsa	6898	TAT	tyrosine aminotransferase	miR-4455	1	1	2	GO:0004838(L-tyrosine:2-oxoglutarate aminotransferase activity),GO:0005575(cellular_component),GO:0005739(mitochondrion),GO:0006519(cellular amino acid and derivative metabolic process),GO:0006559(L-phenylalanine catabolic process),GO:0006572(tyrosine catabolic process),GO:0006979(response to oxidative stress),GO:0008483(transaminase activity),GO:0009058(biosynthetic process),GO:0014070(response …	ko00130(Ubiquinone and other terpenoid-quinone biosynthesis),ko00270(Cysteine and methionine metabolism),ko00350(Tyrosine metabolism),ko00360(Phenylalanine metabolism),ko00400(Phenylalanine,ko tyrosine and tryptophan biosynthesis),ko01100(Metabolic pathways)
NM_000358	hsa	7045	TGFBI	transforming growth factor, beta-induced, 68kDa	miR-181d	1	1	2	GO:0005178(integrin binding),GO:0005515(protein binding),GO:0005576(extracellular region),GO:0005578(proteinaceous extracellular matrix),GO:0005615(extracellular space),GO:0007162(negative regulation of cell adhesion),GO:0007601(visual perception),GO:0008283(cell proliferation),GO:0030198(extracellular matrix organization),GO:0050840(extracellular matrix binding),GO:0050896(response to stimulus)
NM_000359	hsa	7051	TGM1	transglutaminase 1 (K polypeptide epidermal type I, protein-glutamine-gamma-glutamyltransferase)	miR-4497	1	1	2	GO:0001533(cornified envelope),GO:0003810(protein-glutamine gamma-glutamyltransferase activity),GO:0005509(calcium ion binding),GO:0005515(protein binding),GO:0005913(cell-cell adherens junction),GO:0006464(protein modification process),GO:0008415(acyltransferase activity),GO:0009887(organ morphogenesis),GO:0016020(membrane),GO:0016740(transferase activity),GO:0018149(peptide cross-linking),GO:00…
NM_000360	hsa	7054	TH	tyrosine hydroxylase	miR-3665	1	1	2	GO:0001666(response to hypoxia),GO:0001963(synaptic transmission, dopaminergic),GO:0003007(heart morphogenesis),GO:0004511(tyrosine 3-monooxygenase activity),GO:0005515(protein binding),GO:0005634(nucleus),GO:0005737(cytoplasm),GO:0005739(mitochondrion),GO:0005790(smooth endoplasmic reticulum),GO:0005829(cytosol),GO:0006585(dopamine biosynthetic process from tyrosine),GO:0007601(visual perception…	ko00350(Tyrosine metabolism),ko01100(Metabolic pathways),ko05012(Parkinson's disease)
NM_000361	hsa	7056	THBD	thrombomodulin	miR-19b	1	1	2	GO:0004888(transmembrane receptor activity),GO:0005509(calcium ion binding),GO:0005515(protein binding),GO:0005615(extracellular space),GO:0005886(plasma membrane),GO:0005887(integral to plasma membrane),GO:0007565(female pregnancy),GO:0007596(blood coagulation),GO:0009790(embryonic development),GO:0010165(response to X-ray),GO:0032496(response to lipopolysaccharide),GO:0051591(response to cAMP)	ko04610(Complement and coagulation cascades)
NM_000362	hsa	7078	TIMP3	TIMP metallopeptidase inhibitor 3	miR-181d	1	1	2	GO:0004857(enzyme inhibitor activity),GO:0005515(protein binding),GO:0005576(extracellular region),GO:0005604(basement membrane),GO:0005737(cytoplasm),GO:0007417(central nervous system development),GO:0007568(aging),GO:0007601(visual perception),GO:0008191(metalloendopeptidase inhibitor activity),GO:0009612(response to mechanical stimulus),GO:0009725(response to hormone stimulus),GO:0014070(respo…
NM_000362	hsa	7078	TIMP3	TIMP metallopeptidase inhibitor 3	miR-30b	1	1	2	GO:0004857(enzyme inhibitor activity),GO:0005515(protein binding),GO:0005576(extracellular region),GO:0005604(basement membrane),GO:0005737(cytoplasm),GO:0007417(central nervous system development),GO:0007568(aging),GO:0007601(visual perception),GO:0008191(metalloendopeptidase inhibitor activity),GO:0009612(response to mechanical stimulus),GO:0009725(response to hormone stimulus),GO:0014070(respo…
NM_000364	hsa	7139	TNNT2	troponin T type 2 (cardiac)	miR-1260b	1	1	2	GO:0003779(actin binding),GO:0005200(structural constituent of cytoskeleton),GO:0005523(tropomyosin binding),GO:0005737(cytoplasm),GO:0005861(troponin complex),GO:0007507(heart development),GO:0008016(regulation of heart contraction),GO:0030049(muscle filament sliding),GO:0030172(troponin C binding),GO:0031013(troponin I binding),GO:0032780(negative regulation of ATPase activity),GO:0032781(posit…	ko04260(Cardiac muscle contraction),ko05410(Hypertrophic cardiomyopathy (HCM)),ko05414(Dilated cardiomyopathy)
NM_000364	hsa	7139	TNNT2	troponin T type 2 (cardiac)	miR-4455	1	1	2	GO:0003779(actin binding),GO:0005200(structural constituent of cytoskeleton),GO:0005523(tropomyosin binding),GO:0005737(cytoplasm),GO:0005861(troponin complex),GO:0007507(heart development),GO:0008016(regulation of heart contraction),GO:0030049(muscle filament sliding),GO:0030172(troponin C binding),GO:0031013(troponin I binding),GO:0032780(negative regulation of ATPase activity),GO:0032781(posit…	ko04260(Cardiac muscle contraction),ko05410(Hypertrophic cardiomyopathy (HCM)),ko05414(Dilated cardiomyopathy)
NM_000365	hsa	7167	TPI1	triosephosphate isomerase 1	miR-1260b	1	1	2	GO:0004807(triose-phosphate isomerase activity),GO:0005515(protein binding),GO:0005625(soluble fraction),GO:0005634(nucleus),GO:0005829(cytosol),GO:0005975(carbohydrate metabolic process),GO:0006094(gluconeogenesis),GO:0006096(glycolysis),GO:0006098(pentose-phosphate shunt),GO:0006633(fatty acid biosynthetic process),GO:0008152(metabolic process),GO:0009790(embryonic development),GO:0016853(isome…	ko00010(Glycolysis / Gluconeogenesis),ko00051(Fructose and mannose metabolism),ko00562(Inositol phosphate metabolism),ko01100(Metabolic pathways)
NM_000368	hsa	7248	TSC1	tuberous sclerosis 1	miR-19b	1	1	2	GO:0001822(kidney development),GO:0001843(neural tube closure),GO:0005624(membrane fraction),GO:0005737(cytoplasm),GO:0005792(microsome),GO:0005829(cytosol),GO:0005884(actin filament),GO:0005938(cell cortex),GO:0006407(rRNA export from nucleus),GO:0006813(potassium ion transport),GO:0007399(nervous system development),GO:0008285(negative regulation of cell proliferation),GO:0009790(embryonic deve…	ko04150(mTOR signaling pathway),ko04910(Insulin signaling pathway)
NM_000368	hsa	7248	TSC1	tuberous sclerosis 1	miR-30b	1	1	2	GO:0001822(kidney development),GO:0001843(neural tube closure),GO:0005624(membrane fraction),GO:0005737(cytoplasm),GO:0005792(microsome),GO:0005829(cytosol),GO:0005884(actin filament),GO:0005938(cell cortex),GO:0006407(rRNA export from nucleus),GO:0006813(potassium ion transport),GO:0007399(nervous system development),GO:0008285(negative regulation of cell proliferation),GO:0009790(embryonic deve…	ko04150(mTOR signaling pathway),ko04910(Insulin signaling pathway)
NM_000368	hsa	7248	TSC1	tuberous sclerosis 1	miR-320a	1	1	2	GO:0001822(kidney development),GO:0001843(neural tube closure),GO:0005624(membrane fraction),GO:0005737(cytoplasm),GO:0005792(microsome),GO:0005829(cytosol),GO:0005884(actin filament),GO:0005938(cell cortex),GO:0006407(rRNA export from nucleus),GO:0006813(potassium ion transport),GO:0007399(nervous system development),GO:0008285(negative regulation of cell proliferation),GO:0009790(embryonic deve…	ko04150(mTOR signaling pathway),ko04910(Insulin signaling pathway)
NM_000368	hsa	7248	TSC1	tuberous sclerosis 1	miR-320b	1	1	2	GO:0001822(kidney development),GO:0001843(neural tube closure),GO:0005624(membrane fraction),GO:0005737(cytoplasm),GO:0005792(microsome),GO:0005829(cytosol),GO:0005884(actin filament),GO:0005938(cell cortex),GO:0006407(rRNA export from nucleus),GO:0006813(potassium ion transport),GO:0007399(nervous system development),GO:0008285(negative regulation of cell proliferation),GO:0009790(embryonic deve…	ko04150(mTOR signaling pathway),ko04910(Insulin signaling pathway)
NM_000368	hsa	7248	TSC1	tuberous sclerosis 1	miR-320c	1	1	2	GO:0001822(kidney development),GO:0001843(neural tube closure),GO:0005624(membrane fraction),GO:0005737(cytoplasm),GO:0005792(microsome),GO:0005829(cytosol),GO:0005884(actin filament),GO:0005938(cell cortex),GO:0006407(rRNA export from nucleus),GO:0006813(potassium ion transport),GO:0007399(nervous system development),GO:0008285(negative regulation of cell proliferation),GO:0009790(embryonic deve…	ko04150(mTOR signaling pathway),ko04910(Insulin signaling pathway)
NM_000368	hsa	7248	TSC1	tuberous sclerosis 1	miR-4455	1	1	2	GO:0001822(kidney development),GO:0001843(neural tube closure),GO:0005624(membrane fraction),GO:0005737(cytoplasm),GO:0005792(microsome),GO:0005829(cytosol),GO:0005884(actin filament),GO:0005938(cell cortex),GO:0006407(rRNA export from nucleus),GO:0006813(potassium ion transport),GO:0007399(nervous system development),GO:0008285(negative regulation of cell proliferation),GO:0009790(embryonic deve…	ko04150(mTOR signaling pathway),ko04910(Insulin signaling pathway)
NM_000369	hsa	7253	TSHR	thyroid stimulating hormone receptor	miR-3935	1	1	2	GO:0004872(receptor activity),GO:0004996(thyroid-stimulating hormone receptor activity),GO:0005515(protein binding),GO:0005886(plasma membrane),GO:0005887(integral to plasma membrane),GO:0007165(signal transduction),GO:0007187(G-protein signaling, coupled to cyclic nucleotide second messenger),GO:0007189(activation of adenylate cyclase activity by G-protein signaling pathway),GO:0007267(cell-cell…	ko04080(Neuroactive ligand-receptor interaction),ko05320(Autoimmune thyroid disease)
NM_000369	hsa	7253	TSHR	thyroid stimulating hormone receptor	miR-4530	1	1	2	GO:0004872(receptor activity),GO:0004996(thyroid-stimulating hormone receptor activity),GO:0005515(protein binding),GO:0005886(plasma membrane),GO:0005887(integral to plasma membrane),GO:0007165(signal transduction),GO:0007187(G-protein signaling, coupled to cyclic nucleotide second messenger),GO:0007189(activation of adenylate cyclase activity by G-protein signaling pathway),GO:0007267(cell-cell…	ko04080(Neuroactive ligand-receptor interaction),ko05320(Autoimmune thyroid disease)
NM_000369	hsa	7253	TSHR	thyroid stimulating hormone receptor	miR-494	1	1	2	GO:0004872(receptor activity),GO:0004996(thyroid-stimulating hormone receptor activity),GO:0005515(protein binding),GO:0005886(plasma membrane),GO:0005887(integral to plasma membrane),GO:0007165(signal transduction),GO:0007187(G-protein signaling, coupled to cyclic nucleotide second messenger),GO:0007189(activation of adenylate cyclase activity by G-protein signaling pathway),GO:0007267(cell-cell…	ko04080(Neuroactive ligand-receptor interaction),ko05320(Autoimmune thyroid disease)
NM_000369	hsa	7253	TSHR	thyroid stimulating hormone receptor	miR-5096	1	1	2	GO:0004872(receptor activity),GO:0004996(thyroid-stimulating hormone receptor activity),GO:0005515(protein binding),GO:0005886(plasma membrane),GO:0005887(integral to plasma membrane),GO:0007165(signal transduction),GO:0007187(G-protein signaling, coupled to cyclic nucleotide second messenger),GO:0007189(activation of adenylate cyclase activity by G-protein signaling pathway),GO:0007267(cell-cell…	ko04080(Neuroactive ligand-receptor interaction),ko05320(Autoimmune thyroid disease)
NM_000370	hsa	7274	TTPA	tocopherol (alpha) transfer protein	miR-30b	1	1	2	GO:0005215(transporter activity),GO:0005622(intracellular),GO:0005737(cytoplasm),GO:0005770(late endosome),GO:0005829(cytosol),GO:0006629(lipid metabolic process),GO:0006810(transport),GO:0007566(embryo implantation),GO:0007584(response to nutrient),GO:0008431(vitamin E binding),GO:0009268(response to pH),GO:0042360(vitamin E metabolic process)
NM_000370	hsa	7274	TTPA	tocopherol (alpha) transfer protein	miR-320a	1	1	2	GO:0005215(transporter activity),GO:0005622(intracellular),GO:0005737(cytoplasm),GO:0005770(late endosome),GO:0005829(cytosol),GO:0006629(lipid metabolic process),GO:0006810(transport),GO:0007566(embryo implantation),GO:0007584(response to nutrient),GO:0008431(vitamin E binding),GO:0009268(response to pH),GO:0042360(vitamin E metabolic process)
NM_000370	hsa	7274	TTPA	tocopherol (alpha) transfer protein	miR-320b	1	1	2	GO:0005215(transporter activity),GO:0005622(intracellular),GO:0005737(cytoplasm),GO:0005770(late endosome),GO:0005829(cytosol),GO:0006629(lipid metabolic process),GO:0006810(transport),GO:0007566(embryo implantation),GO:0007584(response to nutrient),GO:0008431(vitamin E binding),GO:0009268(response to pH),GO:0042360(vitamin E metabolic process)
NM_000370	hsa	7274	TTPA	tocopherol (alpha) transfer protein	miR-320c	1	1	2	GO:0005215(transporter activity),GO:0005622(intracellular),GO:0005737(cytoplasm),GO:0005770(late endosome),GO:0005829(cytosol),GO:0006629(lipid metabolic process),GO:0006810(transport),GO:0007566(embryo implantation),GO:0007584(response to nutrient),GO:0008431(vitamin E binding),GO:0009268(response to pH),GO:0042360(vitamin E metabolic process)
NM_000370	hsa	7274	TTPA	tocopherol (alpha) transfer protein	miR-4324	1	1	2	GO:0005215(transporter activity),GO:0005622(intracellular),GO:0005737(cytoplasm),GO:0005770(late endosome),GO:0005829(cytosol),GO:0006629(lipid metabolic process),GO:0006810(transport),GO:0007566(embryo implantation),GO:0007584(response to nutrient),GO:0008431(vitamin E binding),GO:0009268(response to pH),GO:0042360(vitamin E metabolic process)
NM_000370	hsa	7274	TTPA	tocopherol (alpha) transfer protein	miR-494	1	1	2	GO:0005215(transporter activity),GO:0005622(intracellular),GO:0005737(cytoplasm),GO:0005770(late endosome),GO:0005829(cytosol),GO:0006629(lipid metabolic process),GO:0006810(transport),GO:0007566(embryo implantation),GO:0007584(response to nutrient),GO:0008431(vitamin E binding),GO:0009268(response to pH),GO:0042360(vitamin E metabolic process)
NM_000372	hsa	7299	TYR	tyrosinase (oculocutaneous albinism IA)	miR-4530	1	1	2	GO:0004497(monooxygenase activity),GO:0004503(monophenol monooxygenase activity),GO:0005507(copper ion binding),GO:0005515(protein binding),GO:0005737(cytoplasm),GO:0005764(lysosome),GO:0005798(Golgi-associated vesicle),GO:0006583(melanin biosynthetic process from tyrosine),GO:0006726(eye pigment biosynthetic process),GO:0007601(visual perception),GO:0016020(membrane),GO:0016021(integral to membr…	ko00350(Tyrosine metabolism),ko00740(Riboflavin metabolism),ko01100(Metabolic pathways),ko04916(Melanogenesis)
NM_000373	hsa	7372	UMPS	uridine monophosphate synthetase	miR-23c	1	1	2	GO:0004588(orotate phosphoribosyltransferase activity),GO:0004590(orotidine-5'-phosphate decarboxylase activity),GO:0005634(nucleus),GO:0005737(cytoplasm),GO:0006207('de novo' pyrimidine base biosynthetic process),GO:0006221(pyrimidine nucleotide biosynthetic process),GO:0006222(UMP biosynthetic process),GO:0008152(metabolic process),GO:0009116(nucleoside metabolic process),GO:0016757(transferase…	ko00240(Pyrimidine metabolism),ko00983(Drug metabolism - other enzymes),ko01100(Metabolic pathways)
NM_000373	hsa	7372	UMPS	uridine monophosphate synthetase	miR-320a	1	1	2	GO:0004588(orotate phosphoribosyltransferase activity),GO:0004590(orotidine-5'-phosphate decarboxylase activity),GO:0005634(nucleus),GO:0005737(cytoplasm),GO:0006207('de novo' pyrimidine base biosynthetic process),GO:0006221(pyrimidine nucleotide biosynthetic process),GO:0006222(UMP biosynthetic process),GO:0008152(metabolic process),GO:0009116(nucleoside metabolic process),GO:0016757(transferase…	ko00240(Pyrimidine metabolism),ko00983(Drug metabolism - other enzymes),ko01100(Metabolic pathways)
NM_000373	hsa	7372	UMPS	uridine monophosphate synthetase	miR-320b	1	1	2	GO:0004588(orotate phosphoribosyltransferase activity),GO:0004590(orotidine-5'-phosphate decarboxylase activity),GO:0005634(nucleus),GO:0005737(cytoplasm),GO:0006207('de novo' pyrimidine base biosynthetic process),GO:0006221(pyrimidine nucleotide biosynthetic process),GO:0006222(UMP biosynthetic process),GO:0008152(metabolic process),GO:0009116(nucleoside metabolic process),GO:0016757(transferase…	ko00240(Pyrimidine metabolism),ko00983(Drug metabolism - other enzymes),ko01100(Metabolic pathways)
NM_000373	hsa	7372	UMPS	uridine monophosphate synthetase	miR-320c	1	1	2	GO:0004588(orotate phosphoribosyltransferase activity),GO:0004590(orotidine-5'-phosphate decarboxylase activity),GO:0005634(nucleus),GO:0005737(cytoplasm),GO:0006207('de novo' pyrimidine base biosynthetic process),GO:0006221(pyrimidine nucleotide biosynthetic process),GO:0006222(UMP biosynthetic process),GO:0008152(metabolic process),GO:0009116(nucleoside metabolic process),GO:0016757(transferase…	ko00240(Pyrimidine metabolism),ko00983(Drug metabolism - other enzymes),ko01100(Metabolic pathways)
NM_000373	hsa	7372	UMPS	uridine monophosphate synthetase	miR-3591-3p	1	1	2	GO:0004588(orotate phosphoribosyltransferase activity),GO:0004590(orotidine-5'-phosphate decarboxylase activity),GO:0005634(nucleus),GO:0005737(cytoplasm),GO:0006207('de novo' pyrimidine base biosynthetic process),GO:0006221(pyrimidine nucleotide biosynthetic process),GO:0006222(UMP biosynthetic process),GO:0008152(metabolic process),GO:0009116(nucleoside metabolic process),GO:0016757(transferase…	ko00240(Pyrimidine metabolism),ko00983(Drug metabolism - other enzymes),ko01100(Metabolic pathways)
NM_000373	hsa	7372	UMPS	uridine monophosphate synthetase	miR-4443	1	1	2	GO:0004588(orotate phosphoribosyltransferase activity),GO:0004590(orotidine-5'-phosphate decarboxylase activity),GO:0005634(nucleus),GO:0005737(cytoplasm),GO:0006207('de novo' pyrimidine base biosynthetic process),GO:0006221(pyrimidine nucleotide biosynthetic process),GO:0006222(UMP biosynthetic process),GO:0008152(metabolic process),GO:0009116(nucleoside metabolic process),GO:0016757(transferase…	ko00240(Pyrimidine metabolism),ko00983(Drug metabolism - other enzymes),ko01100(Metabolic pathways)
NM_000376	hsa	7421	VDR	vitamin D (1,25- dihydroxyvitamin D3) receptor	miR-1260b	1	1	2	GO:0001501(skeletal system development),GO:0003700(transcription factor activity),GO:0003707(steroid hormone receptor activity),GO:0005515(protein binding),GO:0005634(nucleus),GO:0005720(nuclear heterochromatin),GO:0006355(regulation of transcription, DNA-dependent),GO:0006816(calcium ion transport),GO:0006874(cellular calcium ion homeostasis),GO:0007165(signal transduction),GO:0007275(multicellu…
NM_000376	hsa	7421	VDR	vitamin D (1,25- dihydroxyvitamin D3) receptor	miR-3665	1	1	2	GO:0001501(skeletal system development),GO:0003700(transcription factor activity),GO:0003707(steroid hormone receptor activity),GO:0005515(protein binding),GO:0005634(nucleus),GO:0005720(nuclear heterochromatin),GO:0006355(regulation of transcription, DNA-dependent),GO:0006816(calcium ion transport),GO:0006874(cellular calcium ion homeostasis),GO:0007165(signal transduction),GO:0007275(multicellu…
NM_000376	hsa	7421	VDR	vitamin D (1,25- dihydroxyvitamin D3) receptor	miR-4443	1	1	2	GO:0001501(skeletal system development),GO:0003700(transcription factor activity),GO:0003707(steroid hormone receptor activity),GO:0005515(protein binding),GO:0005634(nucleus),GO:0005720(nuclear heterochromatin),GO:0006355(regulation of transcription, DNA-dependent),GO:0006816(calcium ion transport),GO:0006874(cellular calcium ion homeostasis),GO:0007165(signal transduction),GO:0007275(multicellu…
NM_000376	hsa	7421	VDR	vitamin D (1,25- dihydroxyvitamin D3) receptor	miR-4687-3p	1	1	2	GO:0001501(skeletal system development),GO:0003700(transcription factor activity),GO:0003707(steroid hormone receptor activity),GO:0005515(protein binding),GO:0005634(nucleus),GO:0005720(nuclear heterochromatin),GO:0006355(regulation of transcription, DNA-dependent),GO:0006816(calcium ion transport),GO:0006874(cellular calcium ion homeostasis),GO:0007165(signal transduction),GO:0007275(multicellu…
NM_000377	hsa	7454	WAS	Wiskott-Aldrich syndrome (eczema-thrombocytopenia)	miR-3665	1	1	2	GO:0005083(small GTPase regulator activity),GO:0005737(cytoplasm),GO:0005829(cytosol),GO:0006461(protein complex assembly),GO:0006952(defense response),GO:0006955(immune response),GO:0007596(blood coagulation),GO:0008544(epidermis development),GO:0012506(vesicle membrane),GO:0015629(actin cytoskeleton),GO:0016197(endosome transport),GO:0030041(actin filament polymerization),GO:0030048(actin filam…	ko04062(Chemokine signaling pathway),ko04520(Adherens junction),ko04666(Fc gamma R-mediated phagocytosis),ko04810(Regulation of actin cytoskeleton),ko05130(Pathogenic Escherichia coli infection)
NM_000377	hsa	7454	WAS	Wiskott-Aldrich syndrome (eczema-thrombocytopenia)	miR-4734	1	1	2	GO:0005083(small GTPase regulator activity),GO:0005737(cytoplasm),GO:0005829(cytosol),GO:0006461(protein complex assembly),GO:0006952(defense response),GO:0006955(immune response),GO:0007596(blood coagulation),GO:0008544(epidermis development),GO:0012506(vesicle membrane),GO:0015629(actin cytoskeleton),GO:0016197(endosome transport),GO:0030041(actin filament polymerization),GO:0030048(actin filam…	ko04062(Chemokine signaling pathway),ko04520(Adherens junction),ko04666(Fc gamma R-mediated phagocytosis),ko04810(Regulation of actin cytoskeleton),ko05130(Pathogenic Escherichia coli infection)
NM_000378	hsa	7490	WT1	Wilms tumor 1	miR-1246	1	1	2	GO:0000122(negative regulation of transcription from RNA polymerase II promoter),GO:0001570(vasculogenesis),GO:0001656(metanephros development),GO:0001658(branching involved in ureteric bud morphogenesis),GO:0001823(mesonephros development),GO:0003690(double-stranded DNA binding),GO:0003700(transcription factor activity),GO:0003723(RNA binding),GO:0005515(protein binding),GO:0005622(intracellular…
NM_000378	hsa	7490	WT1	Wilms tumor 1	miR-23c	1	1	2	GO:0000122(negative regulation of transcription from RNA polymerase II promoter),GO:0001570(vasculogenesis),GO:0001656(metanephros development),GO:0001658(branching involved in ureteric bud morphogenesis),GO:0001823(mesonephros development),GO:0003690(double-stranded DNA binding),GO:0003700(transcription factor activity),GO:0003723(RNA binding),GO:0005515(protein binding),GO:0005622(intracellular…
NM_000379	hsa	7498	XDH	xanthine dehydrogenase	miR-103a	1	1	2	GO:0004854(xanthine dehydrogenase activity),GO:0004855(xanthine oxidase activity),GO:0005506(iron ion binding),GO:0005777(peroxisome),GO:0005829(cytosol),GO:0007595(lactation),GO:0009055(electron carrier activity),GO:0009115(xanthine catabolic process),GO:0010044(response to aluminum ion),GO:0016491(oxidoreductase activity),GO:0030151(molybdenum ion binding),GO:0030856(regulation of epithelial ce…	ko00230(Purine metabolism),ko00232(Caffeine metabolism),ko00983(Drug metabolism - other enzymes),ko01100(Metabolic pathways)
NM_000379	hsa	7498	XDH	xanthine dehydrogenase	miR-107	1	1	2	GO:0004854(xanthine dehydrogenase activity),GO:0004855(xanthine oxidase activity),GO:0005506(iron ion binding),GO:0005777(peroxisome),GO:0005829(cytosol),GO:0007595(lactation),GO:0009055(electron carrier activity),GO:0009115(xanthine catabolic process),GO:0010044(response to aluminum ion),GO:0016491(oxidoreductase activity),GO:0030151(molybdenum ion binding),GO:0030856(regulation of epithelial ce…	ko00230(Purine metabolism),ko00232(Caffeine metabolism),ko00983(Drug metabolism - other enzymes),ko01100(Metabolic pathways)
NM_000380	hsa	7507	XPA	xeroderma pigmentosum, complementation group A	miR-4530	1	1	2	GO:0000166(nucleotide binding),GO:0000718(nucleotide-excision repair, DNA damage removal),GO:0003684(damaged DNA binding),GO:0005634(nucleus),GO:0005654(nucleoplasm),GO:0006974(response to DNA damage stimulus),GO:0006979(response to oxidative stress),GO:0008270(zinc ion binding),GO:0008630(DNA damage response, signal transduction resulting in induction of apoptosis),GO:0009411(response to UV),GO:…	ko03420(Nucleotide excision repair)
NM_000381	hsa	4281	MID1	midline 1 (Opitz/BBB syndrome)	miR-19b	1	1	2	GO:0000226(microtubule cytoskeleton organization),GO:0005515(protein binding),GO:0005622(intracellular),GO:0005737(cytoplasm),GO:0005819(spindle),GO:0005874(microtubule),GO:0005875(microtubule associated complex),GO:0007026(negative regulation of microtubule depolymerization),GO:0007389(pattern specification process),GO:0008270(zinc ion binding),GO:0016874(ligase activity),GO:0019941(modification…	ko04120(Ubiquitin mediated proteolysis)
NM_000381	hsa	4281	MID1	midline 1 (Opitz/BBB syndrome)	miR-320a	1	1	2	GO:0000226(microtubule cytoskeleton organization),GO:0005515(protein binding),GO:0005622(intracellular),GO:0005737(cytoplasm),GO:0005819(spindle),GO:0005874(microtubule),GO:0005875(microtubule associated complex),GO:0007026(negative regulation of microtubule depolymerization),GO:0007389(pattern specification process),GO:0008270(zinc ion binding),GO:0016874(ligase activity),GO:0019941(modification…	ko04120(Ubiquitin mediated proteolysis)
NM_000381	hsa	4281	MID1	midline 1 (Opitz/BBB syndrome)	miR-320b	1	1	2	GO:0000226(microtubule cytoskeleton organization),GO:0005515(protein binding),GO:0005622(intracellular),GO:0005737(cytoplasm),GO:0005819(spindle),GO:0005874(microtubule),GO:0005875(microtubule associated complex),GO:0007026(negative regulation of microtubule depolymerization),GO:0007389(pattern specification process),GO:0008270(zinc ion binding),GO:0016874(ligase activity),GO:0019941(modification…	ko04120(Ubiquitin mediated proteolysis)
NM_000381	hsa	4281	MID1	midline 1 (Opitz/BBB syndrome)	miR-320c	1	1	2	GO:0000226(microtubule cytoskeleton organization),GO:0005515(protein binding),GO:0005622(intracellular),GO:0005737(cytoplasm),GO:0005819(spindle),GO:0005874(microtubule),GO:0005875(microtubule associated complex),GO:0007026(negative regulation of microtubule depolymerization),GO:0007389(pattern specification process),GO:0008270(zinc ion binding),GO:0016874(ligase activity),GO:0019941(modification…	ko04120(Ubiquitin mediated proteolysis)
NM_000381	hsa	4281	MID1	midline 1 (Opitz/BBB syndrome)	miR-3591-3p	1	1	2	GO:0000226(microtubule cytoskeleton organization),GO:0005515(protein binding),GO:0005622(intracellular),GO:0005737(cytoplasm),GO:0005819(spindle),GO:0005874(microtubule),GO:0005875(microtubule associated complex),GO:0007026(negative regulation of microtubule depolymerization),GO:0007389(pattern specification process),GO:0008270(zinc ion binding),GO:0016874(ligase activity),GO:0019941(modification…	ko04120(Ubiquitin mediated proteolysis)
NM_000381	hsa	4281	MID1	midline 1 (Opitz/BBB syndrome)	miR-4324	1	1	2	GO:0000226(microtubule cytoskeleton organization),GO:0005515(protein binding),GO:0005622(intracellular),GO:0005737(cytoplasm),GO:0005819(spindle),GO:0005874(microtubule),GO:0005875(microtubule associated complex),GO:0007026(negative regulation of microtubule depolymerization),GO:0007389(pattern specification process),GO:0008270(zinc ion binding),GO:0016874(ligase activity),GO:0019941(modification…	ko04120(Ubiquitin mediated proteolysis)
NM_000381	hsa	4281	MID1	midline 1 (Opitz/BBB syndrome)	miR-4530	1	1	2	GO:0000226(microtubule cytoskeleton organization),GO:0005515(protein binding),GO:0005622(intracellular),GO:0005737(cytoplasm),GO:0005819(spindle),GO:0005874(microtubule),GO:0005875(microtubule associated complex),GO:0007026(negative regulation of microtubule depolymerization),GO:0007389(pattern specification process),GO:0008270(zinc ion binding),GO:0016874(ligase activity),GO:0019941(modification…	ko04120(Ubiquitin mediated proteolysis)
NM_000381	hsa	4281	MID1	midline 1 (Opitz/BBB syndrome)	miR-4534	1	1	2	GO:0000226(microtubule cytoskeleton organization),GO:0005515(protein binding),GO:0005622(intracellular),GO:0005737(cytoplasm),GO:0005819(spindle),GO:0005874(microtubule),GO:0005875(microtubule associated complex),GO:0007026(negative regulation of microtubule depolymerization),GO:0007389(pattern specification process),GO:0008270(zinc ion binding),GO:0016874(ligase activity),GO:0019941(modification…	ko04120(Ubiquitin mediated proteolysis)
NM_000382	hsa	224	ALDH3A2	aldehyde dehydrogenase 3 family, member A2	miR-23c	1	1	2	GO:0004028(3-chloroallyl aldehyde dehydrogenase activity),GO:0004029(aldehyde dehydrogenase (NAD) activity),GO:0004030(aldehyde dehydrogenase [NAD(P)+] activity),GO:0005783(endoplasmic reticulum),GO:0006081(cellular aldehyde metabolic process),GO:0006629(lipid metabolic process),GO:0007417(central nervous system development),GO:0007422(peripheral nervous system development),GO:0008544(epidermis d…	ko00010(Glycolysis / Gluconeogenesis),ko00053(Ascorbate and aldarate metabolism),ko00071(Fatty acid metabolism),ko00280(Valine,ko leucine and isoleucine degradation),ko00310(Lysine degradation),ko00330(Arginine and proline metabolism),ko00340(Histidine metabolism),ko00380(Tryptophan metabolism),ko00410(beta-Alanine metabolism),ko00561(Glycerolipid metabolism),ko00620(Pyruvate metabolism),ko00640(…
NM_000382	hsa	224	ALDH3A2	aldehyde dehydrogenase 3 family, member A2	miR-4530	1	1	2	GO:0004028(3-chloroallyl aldehyde dehydrogenase activity),GO:0004029(aldehyde dehydrogenase (NAD) activity),GO:0004030(aldehyde dehydrogenase [NAD(P)+] activity),GO:0005783(endoplasmic reticulum),GO:0006081(cellular aldehyde metabolic process),GO:0006629(lipid metabolic process),GO:0007417(central nervous system development),GO:0007422(peripheral nervous system development),GO:0008544(epidermis d…	ko00010(Glycolysis / Gluconeogenesis),ko00053(Ascorbate and aldarate metabolism),ko00071(Fatty acid metabolism),ko00280(Valine,ko leucine and isoleucine degradation),ko00310(Lysine degradation),ko00330(Arginine and proline metabolism),ko00340(Histidine metabolism),ko00380(Tryptophan metabolism),ko00410(beta-Alanine metabolism),ko00561(Glycerolipid metabolism),ko00620(Pyruvate metabolism),ko00640(…
NM_000386	hsa	642	BLMH	bleomycin hydrolase	miR-3935	1	1	2	GO:0004177(aminopeptidase activity),GO:0004180(carboxypeptidase activity),GO:0004197(cysteine-type endopeptidase activity),GO:0005515(protein binding),GO:0005625(soluble fraction),GO:0005634(nucleus),GO:0005737(cytoplasm),GO:0006508(proteolysis),GO:0008233(peptidase activity),GO:0009636(response to toxin),GO:0042493(response to drug)
NM_000386	hsa	642	BLMH	bleomycin hydrolase	miR-4530	1	1	2	GO:0004177(aminopeptidase activity),GO:0004180(carboxypeptidase activity),GO:0004197(cysteine-type endopeptidase activity),GO:0005515(protein binding),GO:0005625(soluble fraction),GO:0005634(nucleus),GO:0005737(cytoplasm),GO:0006508(proteolysis),GO:0008233(peptidase activity),GO:0009636(response to toxin),GO:0042493(response to drug)
NM_000387	hsa	788	SLC25A20	solute carrier family 25 (carnitine/acylcarnitine translocase), member 20	miR-103a	1	1	2	GO:0005215(transporter activity),GO:0005488(binding),GO:0005739(mitochondrion),GO:0005743(mitochondrial inner membrane),GO:0006853(carnitine shuttle),GO:0015227(acyl carnitine transporter activity),GO:0016020(membrane),GO:0016021(integral to membrane),GO:0046320(regulation of fatty acid oxidation),GO:0055085(transmembrane transport)
NM_000387	hsa	788	SLC25A20	solute carrier family 25 (carnitine/acylcarnitine translocase), member 20	miR-107	1	1	2	GO:0005215(transporter activity),GO:0005488(binding),GO:0005739(mitochondrion),GO:0005743(mitochondrial inner membrane),GO:0006853(carnitine shuttle),GO:0015227(acyl carnitine transporter activity),GO:0016020(membrane),GO:0016021(integral to membrane),GO:0046320(regulation of fatty acid oxidation),GO:0055085(transmembrane transport)
NM_000387	hsa	788	SLC25A20	solute carrier family 25 (carnitine/acylcarnitine translocase), member 20	miR-4324	1	1	2	GO:0005215(transporter activity),GO:0005488(binding),GO:0005739(mitochondrion),GO:0005743(mitochondrial inner membrane),GO:0006853(carnitine shuttle),GO:0015227(acyl carnitine transporter activity),GO:0016020(membrane),GO:0016021(integral to membrane),GO:0046320(regulation of fatty acid oxidation),GO:0055085(transmembrane transport)
NM_000387	hsa	788	SLC25A20	solute carrier family 25 (carnitine/acylcarnitine translocase), member 20	miR-4530	1	1	2	GO:0005215(transporter activity),GO:0005488(binding),GO:0005739(mitochondrion),GO:0005743(mitochondrial inner membrane),GO:0006853(carnitine shuttle),GO:0015227(acyl carnitine transporter activity),GO:0016020(membrane),GO:0016021(integral to membrane),GO:0046320(regulation of fatty acid oxidation),GO:0055085(transmembrane transport)
NM_000389	hsa	1026	CDKN1A	cyclin-dependent kinase inhibitor 1A (p21, Cip1)	miR-4455	1	1	2	GO:0000082(G1/S transition of mitotic cell cycle),GO:0000086(G2/M transition of mitotic cell cycle),GO:0000307(cyclin-dependent protein kinase holoenzyme complex),GO:0004860(protein kinase inhibitor activity),GO:0004861(cyclin-dependent protein kinase inhibitor activity),GO:0005634(nucleus),GO:0005654(nucleoplasm),GO:0005737(cytoplasm),GO:0005829(cytosol),GO:0006974(response to DNA damage stimulu…	ko04012(ErbB signaling pathway),ko04110(Cell cycle),ko04115(p53 signaling pathway),ko05200(Pathways in cancer),ko05214(Glioma),ko05215(Prostate cancer),ko05218(Melanoma),ko05219(Bladder cancer),ko05220(Chronic myeloid leukemia)
NM_000389	hsa	1026	CDKN1A	cyclin-dependent kinase inhibitor 1A (p21, Cip1)	miR-4497	1	1	2	GO:0000082(G1/S transition of mitotic cell cycle),GO:0000086(G2/M transition of mitotic cell cycle),GO:0000307(cyclin-dependent protein kinase holoenzyme complex),GO:0004860(protein kinase inhibitor activity),GO:0004861(cyclin-dependent protein kinase inhibitor activity),GO:0005634(nucleus),GO:0005654(nucleoplasm),GO:0005737(cytoplasm),GO:0005829(cytosol),GO:0006974(response to DNA damage stimulu…	ko04012(ErbB signaling pathway),ko04110(Cell cycle),ko04115(p53 signaling pathway),ko05200(Pathways in cancer),ko05214(Glioma),ko05215(Prostate cancer),ko05218(Melanoma),ko05219(Bladder cancer),ko05220(Chronic myeloid leukemia)
NM_000390	hsa	1121	CHM	choroideremia (Rab escort protein 1)	miR-4324	1	1	2	GO:0001568(blood vessel development),GO:0004663(Rab geranylgeranyltransferase activity),GO:0005096(GTPase activator activity),GO:0005515(protein binding),GO:0005968(Rab-protein geranylgeranyltransferase complex),GO:0006886(intracellular protein transport),GO:0007601(visual perception),GO:0017137(Rab GTPase binding),GO:0018348(protein amino acid geranylgeranylation),GO:0043087(regulation of GTPase…
NM_000391	hsa	1200	TPP1	tripeptidyl peptidase I	miR-4443	1	1	2	GO:0004252(serine-type endopeptidase activity),GO:0005515(protein binding),GO:0005625(soluble fraction),GO:0005739(mitochondrion),GO:0005764(lysosome),GO:0006508(proteolysis),GO:0006629(lipid metabolic process),GO:0007040(lysosome organization),GO:0007399(nervous system development),GO:0008219(cell death),GO:0008233(peptidase activity),GO:0008240(tripeptidyl-peptidase activity),GO:0042277(peptide…	ko04142(Lysosome)
NM_000391	hsa	1200	TPP1	tripeptidyl peptidase I	miR-4534	1	1	2	GO:0004252(serine-type endopeptidase activity),GO:0005515(protein binding),GO:0005625(soluble fraction),GO:0005739(mitochondrion),GO:0005764(lysosome),GO:0006508(proteolysis),GO:0006629(lipid metabolic process),GO:0007040(lysosome organization),GO:0007399(nervous system development),GO:0008219(cell death),GO:0008233(peptidase activity),GO:0008240(tripeptidyl-peptidase activity),GO:0042277(peptide…	ko04142(Lysosome)
NM_000393	hsa	1290	COL5A2	collagen, type V, alpha 2	miR-23c	1	1	2	GO:0001501(skeletal system development),GO:0001503(ossification),GO:0003674(molecular_function),GO:0005201(extracellular matrix structural constituent),GO:0005576(extracellular region),GO:0005581(collagen),GO:0005588(collagen type V),GO:0030199(collagen fibril organization),GO:0043588(skin development),GO:0046332(SMAD binding),GO:0048592(eye morphogenesis)	ko04510(Focal adhesion),ko04512(ECM-receptor interaction)
NM_000393	hsa	1290	COL5A2	collagen, type V, alpha 2	miR-30b	1	1	2	GO:0001501(skeletal system development),GO:0001503(ossification),GO:0003674(molecular_function),GO:0005201(extracellular matrix structural constituent),GO:0005576(extracellular region),GO:0005581(collagen),GO:0005588(collagen type V),GO:0030199(collagen fibril organization),GO:0043588(skin development),GO:0046332(SMAD binding),GO:0048592(eye morphogenesis)	ko04510(Focal adhesion),ko04512(ECM-receptor interaction)
NM_000393	hsa	1290	COL5A2	collagen, type V, alpha 2	miR-3935	1	1	2	GO:0001501(skeletal system development),GO:0001503(ossification),GO:0003674(molecular_function),GO:0005201(extracellular matrix structural constituent),GO:0005576(extracellular region),GO:0005581(collagen),GO:0005588(collagen type V),GO:0030199(collagen fibril organization),GO:0043588(skin development),GO:0046332(SMAD binding),GO:0048592(eye morphogenesis)	ko04510(Focal adhesion),ko04512(ECM-receptor interaction)
NM_000394	hsa	1409	CRYAA	crystallin, alpha A	miR-3665	1	1	2	GO:0000072(M phase specific microtubule process),GO:0005212(structural constituent of eye lens),GO:0005737(cytoplasm),GO:0006916(anti-apoptosis),GO:0007005(mitochondrion organization),GO:0007015(actin filament organization),GO:0007601(visual perception),GO:0009408(response to heat),GO:0032387(negative regulation of intracellular transport),GO:0042026(protein refolding),GO:0043010(camera-type eye …
NM_000394	hsa	1409	CRYAA	crystallin, alpha A	miR-4324	1	1	2	GO:0000072(M phase specific microtubule process),GO:0005212(structural constituent of eye lens),GO:0005737(cytoplasm),GO:0006916(anti-apoptosis),GO:0007005(mitochondrion organization),GO:0007015(actin filament organization),GO:0007601(visual perception),GO:0009408(response to heat),GO:0032387(negative regulation of intracellular transport),GO:0042026(protein refolding),GO:0043010(camera-type eye …
NM_000395	hsa	1439	CSF2RB	colony stimulating factor 2 receptor, beta, low-affinity (granulocyte-macrophage)	miR-1260b	1	1	2	GO:0004872(receptor activity),GO:0004912(interleukin-3 receptor activity),GO:0004914(interleukin-5 receptor activity),GO:0005515(protein binding),GO:0007165(signal transduction),GO:0007585(respiratory gaseous exchange),GO:0016020(membrane),GO:0019221(cytokine-mediated signaling pathway),GO:0030526(granulocyte macrophage colony-stimulating factor receptor complex)	ko04060(Cytokine-cytokine receptor interaction),ko04210(Apoptosis),ko04630(Jak-STAT signaling pathway)
NM_000395	hsa	1439	CSF2RB	colony stimulating factor 2 receptor, beta, low-affinity (granulocyte-macrophage)	miR-181d	1	1	2	GO:0004872(receptor activity),GO:0004912(interleukin-3 receptor activity),GO:0004914(interleukin-5 receptor activity),GO:0005515(protein binding),GO:0007165(signal transduction),GO:0007585(respiratory gaseous exchange),GO:0016020(membrane),GO:0019221(cytokine-mediated signaling pathway),GO:0030526(granulocyte macrophage colony-stimulating factor receptor complex)	ko04060(Cytokine-cytokine receptor interaction),ko04210(Apoptosis),ko04630(Jak-STAT signaling pathway)
NM_000395	hsa	1439	CSF2RB	colony stimulating factor 2 receptor, beta, low-affinity (granulocyte-macrophage)	miR-19b	1	1	2	GO:0004872(receptor activity),GO:0004912(interleukin-3 receptor activity),GO:0004914(interleukin-5 receptor activity),GO:0005515(protein binding),GO:0007165(signal transduction),GO:0007585(respiratory gaseous exchange),GO:0016020(membrane),GO:0019221(cytokine-mediated signaling pathway),GO:0030526(granulocyte macrophage colony-stimulating factor receptor complex)	ko04060(Cytokine-cytokine receptor interaction),ko04210(Apoptosis),ko04630(Jak-STAT signaling pathway)
NM_000396	hsa	1513	CTSK	cathepsin K	miR-23c	1	1	2	GO:0001957(intramembranous ossification),GO:0004197(cysteine-type endopeptidase activity),GO:0005515(protein binding),GO:0005615(extracellular space),GO:0005737(cytoplasm),GO:0005764(lysosome),GO:0006508(proteolysis),GO:0008233(peptidase activity),GO:0045453(bone resorption)	ko04142(Lysosome)
NM_000397	hsa	1536	CYBB	cytochrome b-245, beta polypeptide	miR-4277	1	1	2	GO:0005244(voltage-gated ion channel activity),GO:0005515(protein binding),GO:0005737(cytoplasm),GO:0005739(mitochondrion),GO:0005886(plasma membrane),GO:0006811(ion transport),GO:0006954(inflammatory response),GO:0009055(electron carrier activity),GO:0016175(superoxide-generating NADPH oxidase activity),GO:0016491(oxidoreductase activity),GO:0020037(heme binding),GO:0022900(electron transport ch…	ko04670(Leukocyte transendothelial migration)
NM_000397	hsa	1536	CYBB	cytochrome b-245, beta polypeptide	miR-494	1	1	2	GO:0005244(voltage-gated ion channel activity),GO:0005515(protein binding),GO:0005737(cytoplasm),GO:0005739(mitochondrion),GO:0005886(plasma membrane),GO:0006811(ion transport),GO:0006954(inflammatory response),GO:0009055(electron carrier activity),GO:0016175(superoxide-generating NADPH oxidase activity),GO:0016491(oxidoreductase activity),GO:0020037(heme binding),GO:0022900(electron transport ch…	ko04670(Leukocyte transendothelial migration)
NM_000398	hsa	1727	CYB5R3	cytochrome b5 reductase 3	miR-4455	1	1	2	GO:0004128(cytochrome-b5 reductase activity),GO:0005737(cytoplasm),GO:0005739(mitochondrion),GO:0005741(mitochondrial outer membrane),GO:0005743(mitochondrial inner membrane),GO:0005783(endoplasmic reticulum),GO:0005833(hemoglobin complex),GO:0006695(cholesterol biosynthetic process),GO:0008015(blood circulation),GO:0016020(membrane),GO:0016491(oxidoreductase activity),GO:0055114(oxidation reduct…	ko00520(Amino sugar and nucleotide sugar metabolism)
NM_000399	hsa	1959	EGR2	early growth response 2	miR-4497	1	1	2	GO:0003700(transcription factor activity),GO:0005515(protein binding),GO:0005622(intracellular),GO:0005634(nucleus),GO:0006355(regulation of transcription, DNA-dependent),GO:0007611(learning or memory),GO:0007622(rhythmic behavior),GO:0008045(motor axon guidance),GO:0008270(zinc ion binding),GO:0014037(Schwann cell differentiation),GO:0021569(rhombomere 3 development),GO:0021612(facial nerve stru…
NM_000399	hsa	1959	EGR2	early growth response 2	miR-5096	1	1	2	GO:0003700(transcription factor activity),GO:0005515(protein binding),GO:0005622(intracellular),GO:0005634(nucleus),GO:0006355(regulation of transcription, DNA-dependent),GO:0007611(learning or memory),GO:0007622(rhythmic behavior),GO:0008045(motor axon guidance),GO:0008270(zinc ion binding),GO:0014037(Schwann cell differentiation),GO:0021569(rhombomere 3 development),GO:0021612(facial nerve stru…
NM_000401	hsa	2132	EXT2	exostoses (multiple) 2	miR-103a	1	1	2	GO:0001503(ossification),GO:0001707(mesoderm formation),GO:0005515(protein binding),GO:0005783(endoplasmic reticulum),GO:0005794(Golgi apparatus),GO:0006024(glycosaminoglycan biosynthetic process),GO:0007165(signal transduction),GO:0015014(heparan sulfate proteoglycan biosynthetic process, polysaccharide chain biosynthetic process),GO:0016020(membrane),GO:0016021(integral to membrane),GO:0030154(…	ko00534(Heparan sulfate biosynthesis),ko01100(Metabolic pathways)
NM_000401	hsa	2132	EXT2	exostoses (multiple) 2	miR-107	1	1	2	GO:0001503(ossification),GO:0001707(mesoderm formation),GO:0005515(protein binding),GO:0005783(endoplasmic reticulum),GO:0005794(Golgi apparatus),GO:0006024(glycosaminoglycan biosynthetic process),GO:0007165(signal transduction),GO:0015014(heparan sulfate proteoglycan biosynthetic process, polysaccharide chain biosynthetic process),GO:0016020(membrane),GO:0016021(integral to membrane),GO:0030154(…	ko00534(Heparan sulfate biosynthesis),ko01100(Metabolic pathways)
NM_000401	hsa	2132	EXT2	exostoses (multiple) 2	miR-1260b	1	1	2	GO:0001503(ossification),GO:0001707(mesoderm formation),GO:0005515(protein binding),GO:0005783(endoplasmic reticulum),GO:0005794(Golgi apparatus),GO:0006024(glycosaminoglycan biosynthetic process),GO:0007165(signal transduction),GO:0015014(heparan sulfate proteoglycan biosynthetic process, polysaccharide chain biosynthetic process),GO:0016020(membrane),GO:0016021(integral to membrane),GO:0030154(…	ko00534(Heparan sulfate biosynthesis),ko01100(Metabolic pathways)
NM_000401	hsa	2132	EXT2	exostoses (multiple) 2	miR-4530	1	1	2	GO:0001503(ossification),GO:0001707(mesoderm formation),GO:0005515(protein binding),GO:0005783(endoplasmic reticulum),GO:0005794(Golgi apparatus),GO:0006024(glycosaminoglycan biosynthetic process),GO:0007165(signal transduction),GO:0015014(heparan sulfate proteoglycan biosynthetic process, polysaccharide chain biosynthetic process),GO:0016020(membrane),GO:0016021(integral to membrane),GO:0030154(…	ko00534(Heparan sulfate biosynthesis),ko01100(Metabolic pathways)
NM_000402	hsa	2539	G6PD	glucose-6-phosphate dehydrogenase	miR-4687-3p	1	1	2	GO:0001816(cytokine production),GO:0004345(glucose-6-phosphate dehydrogenase activity),GO:0005488(binding),GO:0005536(glucose binding),GO:0005737(cytoplasm),GO:0005813(centrosome),GO:0005829(cytosol),GO:0005975(carbohydrate metabolic process),GO:0006006(glucose metabolic process),GO:0006010(glucose 6-phosphate utilization),GO:0006629(lipid metabolic process),GO:0006695(cholesterol biosynthetic pr…	ko00030(Pentose phosphate pathway),ko00480(Glutathione metabolism),ko01100(Metabolic pathways)
NM_000405	hsa	2760	GM2A	GM2 ganglioside activator	miR-30b	1	1	2	GO:0005319(lipid transporter activity),GO:0005737(cytoplasm),GO:0005739(mitochondrion),GO:0005764(lysosome),GO:0005889(hydrogen:potassium-exchanging ATPase complex),GO:0006629(lipid metabolic process),GO:0006689(ganglioside catabolic process),GO:0006869(lipid transport),GO:0007611(learning or memory),GO:0009313(oligosaccharide catabolic process),GO:0009898(internal side of plasma membrane),GO:001…	ko04142(Lysosome)
NM_000405	hsa	2760	GM2A	GM2 ganglioside activator	miR-4324	1	1	2	GO:0005319(lipid transporter activity),GO:0005737(cytoplasm),GO:0005739(mitochondrion),GO:0005764(lysosome),GO:0005889(hydrogen:potassium-exchanging ATPase complex),GO:0006629(lipid metabolic process),GO:0006689(ganglioside catabolic process),GO:0006869(lipid transport),GO:0007611(learning or memory),GO:0009313(oligosaccharide catabolic process),GO:0009898(internal side of plasma membrane),GO:001…	ko04142(Lysosome)
NM_000405	hsa	2760	GM2A	GM2 ganglioside activator	miR-4530	1	1	2	GO:0005319(lipid transporter activity),GO:0005737(cytoplasm),GO:0005739(mitochondrion),GO:0005764(lysosome),GO:0005889(hydrogen:potassium-exchanging ATPase complex),GO:0006629(lipid metabolic process),GO:0006689(ganglioside catabolic process),GO:0006869(lipid transport),GO:0007611(learning or memory),GO:0009313(oligosaccharide catabolic process),GO:0009898(internal side of plasma membrane),GO:001…	ko04142(Lysosome)
NM_000405	hsa	2760	GM2A	GM2 ganglioside activator	miR-4534	1	1	2	GO:0005319(lipid transporter activity),GO:0005737(cytoplasm),GO:0005739(mitochondrion),GO:0005764(lysosome),GO:0005889(hydrogen:potassium-exchanging ATPase complex),GO:0006629(lipid metabolic process),GO:0006689(ganglioside catabolic process),GO:0006869(lipid transport),GO:0007611(learning or memory),GO:0009313(oligosaccharide catabolic process),GO:0009898(internal side of plasma membrane),GO:001…	ko04142(Lysosome)
NM_000405	hsa	2760	GM2A	GM2 ganglioside activator	miR-4734	1	1	2	GO:0005319(lipid transporter activity),GO:0005737(cytoplasm),GO:0005739(mitochondrion),GO:0005764(lysosome),GO:0005889(hydrogen:potassium-exchanging ATPase complex),GO:0006629(lipid metabolic process),GO:0006689(ganglioside catabolic process),GO:0006869(lipid transport),GO:0007611(learning or memory),GO:0009313(oligosaccharide catabolic process),GO:0009898(internal side of plasma membrane),GO:001…	ko04142(Lysosome)
NM_000406	hsa	2798	GNRHR	gonadotropin-releasing hormone receptor	miR-1246	1	1	2	GO:0004872(receptor activity),GO:0004968(gonadotropin-releasing hormone receptor activity),GO:0005515(protein binding),GO:0005886(plasma membrane),GO:0005887(integral to plasma membrane),GO:0007165(signal transduction),GO:0007186(G-protein coupled receptor protein signaling pathway),GO:0007275(multicellular organismal development),GO:0008285(negative regulation of cell proliferation),GO:0016520(g…	ko04080(Neuroactive ligand-receptor interaction),ko04912(GnRH signaling pathway)
NM_000406	hsa	2798	GNRHR	gonadotropin-releasing hormone receptor	miR-23c	1	1	2	GO:0004872(receptor activity),GO:0004968(gonadotropin-releasing hormone receptor activity),GO:0005515(protein binding),GO:0005886(plasma membrane),GO:0005887(integral to plasma membrane),GO:0007165(signal transduction),GO:0007186(G-protein coupled receptor protein signaling pathway),GO:0007275(multicellular organismal development),GO:0008285(negative regulation of cell proliferation),GO:0016520(g…	ko04080(Neuroactive ligand-receptor interaction),ko04912(GnRH signaling pathway)
NM_000406	hsa	2798	GNRHR	gonadotropin-releasing hormone receptor	miR-30b	1	1	2	GO:0004872(receptor activity),GO:0004968(gonadotropin-releasing hormone receptor activity),GO:0005515(protein binding),GO:0005886(plasma membrane),GO:0005887(integral to plasma membrane),GO:0007165(signal transduction),GO:0007186(G-protein coupled receptor protein signaling pathway),GO:0007275(multicellular organismal development),GO:0008285(negative regulation of cell proliferation),GO:0016520(g…	ko04080(Neuroactive ligand-receptor interaction),ko04912(GnRH signaling pathway)
NM_000406	hsa	2798	GNRHR	gonadotropin-releasing hormone receptor	miR-3935	1	1	2	GO:0004872(receptor activity),GO:0004968(gonadotropin-releasing hormone receptor activity),GO:0005515(protein binding),GO:0005886(plasma membrane),GO:0005887(integral to plasma membrane),GO:0007165(signal transduction),GO:0007186(G-protein coupled receptor protein signaling pathway),GO:0007275(multicellular organismal development),GO:0008285(negative regulation of cell proliferation),GO:0016520(g…	ko04080(Neuroactive ligand-receptor interaction),ko04912(GnRH signaling pathway)
NM_000406	hsa	2798	GNRHR	gonadotropin-releasing hormone receptor	miR-4534	1	1	2	GO:0004872(receptor activity),GO:0004968(gonadotropin-releasing hormone receptor activity),GO:0005515(protein binding),GO:0005886(plasma membrane),GO:0005887(integral to plasma membrane),GO:0007165(signal transduction),GO:0007186(G-protein coupled receptor protein signaling pathway),GO:0007275(multicellular organismal development),GO:0008285(negative regulation of cell proliferation),GO:0016520(g…	ko04080(Neuroactive ligand-receptor interaction),ko04912(GnRH signaling pathway)
NM_000406	hsa	2798	GNRHR	gonadotropin-releasing hormone receptor	miR-494	1	1	2	GO:0004872(receptor activity),GO:0004968(gonadotropin-releasing hormone receptor activity),GO:0005515(protein binding),GO:0005886(plasma membrane),GO:0005887(integral to plasma membrane),GO:0007165(signal transduction),GO:0007186(G-protein coupled receptor protein signaling pathway),GO:0007275(multicellular organismal development),GO:0008285(negative regulation of cell proliferation),GO:0016520(g…	ko04080(Neuroactive ligand-receptor interaction),ko04912(GnRH signaling pathway)
NM_000407	hsa	2812	GP1BB	glycoprotein Ib (platelet), beta polypeptide	miR-3665	1	1	2	GO:0004888(transmembrane receptor activity),GO:0005515(protein binding),GO:0005886(plasma membrane),GO:0005887(integral to plasma membrane),GO:0007155(cell adhesion),GO:0007166(cell surface receptor linked signal transduction),GO:0030168(platelet activation)	ko04512(ECM-receptor interaction),ko04640(Hematopoietic cell lineage)
NM_000408	hsa	2820	GPD2	glycerol-3-phosphate dehydrogenase 2 (mitochondrial)	miR-181d	1	1	2	GO:0004368(glycerol-3-phosphate dehydrogenase activity),GO:0005509(calcium ion binding),GO:0005739(mitochondrion),GO:0005743(mitochondrial inner membrane),GO:0006072(glycerol-3-phosphate metabolic process),GO:0006094(gluconeogenesis),GO:0009331(glycerol-3-phosphate dehydrogenase complex),GO:0016491(oxidoreductase activity),GO:0055114(oxidation reduction)	ko00564(Glycerophospholipid metabolism)
NM_000408	hsa	2820	GPD2	glycerol-3-phosphate dehydrogenase 2 (mitochondrial)	miR-320a	1	1	2	GO:0004368(glycerol-3-phosphate dehydrogenase activity),GO:0005509(calcium ion binding),GO:0005739(mitochondrion),GO:0005743(mitochondrial inner membrane),GO:0006072(glycerol-3-phosphate metabolic process),GO:0006094(gluconeogenesis),GO:0009331(glycerol-3-phosphate dehydrogenase complex),GO:0016491(oxidoreductase activity),GO:0055114(oxidation reduction)	ko00564(Glycerophospholipid metabolism)
NM_000408	hsa	2820	GPD2	glycerol-3-phosphate dehydrogenase 2 (mitochondrial)	miR-320b	1	1	2	GO:0004368(glycerol-3-phosphate dehydrogenase activity),GO:0005509(calcium ion binding),GO:0005739(mitochondrion),GO:0005743(mitochondrial inner membrane),GO:0006072(glycerol-3-phosphate metabolic process),GO:0006094(gluconeogenesis),GO:0009331(glycerol-3-phosphate dehydrogenase complex),GO:0016491(oxidoreductase activity),GO:0055114(oxidation reduction)	ko00564(Glycerophospholipid metabolism)
NM_000408	hsa	2820	GPD2	glycerol-3-phosphate dehydrogenase 2 (mitochondrial)	miR-320c	1	1	2	GO:0004368(glycerol-3-phosphate dehydrogenase activity),GO:0005509(calcium ion binding),GO:0005739(mitochondrion),GO:0005743(mitochondrial inner membrane),GO:0006072(glycerol-3-phosphate metabolic process),GO:0006094(gluconeogenesis),GO:0009331(glycerol-3-phosphate dehydrogenase complex),GO:0016491(oxidoreductase activity),GO:0055114(oxidation reduction)	ko00564(Glycerophospholipid metabolism)
NM_000408	hsa	2820	GPD2	glycerol-3-phosphate dehydrogenase 2 (mitochondrial)	miR-3591-3p	1	1	2	GO:0004368(glycerol-3-phosphate dehydrogenase activity),GO:0005509(calcium ion binding),GO:0005739(mitochondrion),GO:0005743(mitochondrial inner membrane),GO:0006072(glycerol-3-phosphate metabolic process),GO:0006094(gluconeogenesis),GO:0009331(glycerol-3-phosphate dehydrogenase complex),GO:0016491(oxidoreductase activity),GO:0055114(oxidation reduction)	ko00564(Glycerophospholipid metabolism)
NM_000408	hsa	2820	GPD2	glycerol-3-phosphate dehydrogenase 2 (mitochondrial)	miR-3935	1	1	2	GO:0004368(glycerol-3-phosphate dehydrogenase activity),GO:0005509(calcium ion binding),GO:0005739(mitochondrion),GO:0005743(mitochondrial inner membrane),GO:0006072(glycerol-3-phosphate metabolic process),GO:0006094(gluconeogenesis),GO:0009331(glycerol-3-phosphate dehydrogenase complex),GO:0016491(oxidoreductase activity),GO:0055114(oxidation reduction)	ko00564(Glycerophospholipid metabolism)
NM_000408	hsa	2820	GPD2	glycerol-3-phosphate dehydrogenase 2 (mitochondrial)	miR-4277	1	1	2	GO:0004368(glycerol-3-phosphate dehydrogenase activity),GO:0005509(calcium ion binding),GO:0005739(mitochondrion),GO:0005743(mitochondrial inner membrane),GO:0006072(glycerol-3-phosphate metabolic process),GO:0006094(gluconeogenesis),GO:0009331(glycerol-3-phosphate dehydrogenase complex),GO:0016491(oxidoreductase activity),GO:0055114(oxidation reduction)	ko00564(Glycerophospholipid metabolism)
NM_000408	hsa	2820	GPD2	glycerol-3-phosphate dehydrogenase 2 (mitochondrial)	miR-4530	1	1	2	GO:0004368(glycerol-3-phosphate dehydrogenase activity),GO:0005509(calcium ion binding),GO:0005739(mitochondrion),GO:0005743(mitochondrial inner membrane),GO:0006072(glycerol-3-phosphate metabolic process),GO:0006094(gluconeogenesis),GO:0009331(glycerol-3-phosphate dehydrogenase complex),GO:0016491(oxidoreductase activity),GO:0055114(oxidation reduction)	ko00564(Glycerophospholipid metabolism)
NM_000408	hsa	2820	GPD2	glycerol-3-phosphate dehydrogenase 2 (mitochondrial)	miR-4687-3p	1	1	2	GO:0004368(glycerol-3-phosphate dehydrogenase activity),GO:0005509(calcium ion binding),GO:0005739(mitochondrion),GO:0005743(mitochondrial inner membrane),GO:0006072(glycerol-3-phosphate metabolic process),GO:0006094(gluconeogenesis),GO:0009331(glycerol-3-phosphate dehydrogenase complex),GO:0016491(oxidoreductase activity),GO:0055114(oxidation reduction)	ko00564(Glycerophospholipid metabolism)
NM_000408	hsa	2820	GPD2	glycerol-3-phosphate dehydrogenase 2 (mitochondrial)	miR-494	1	1	2	GO:0004368(glycerol-3-phosphate dehydrogenase activity),GO:0005509(calcium ion binding),GO:0005739(mitochondrion),GO:0005743(mitochondrial inner membrane),GO:0006072(glycerol-3-phosphate metabolic process),GO:0006094(gluconeogenesis),GO:0009331(glycerol-3-phosphate dehydrogenase complex),GO:0016491(oxidoreductase activity),GO:0055114(oxidation reduction)	ko00564(Glycerophospholipid metabolism)
NM_000409	hsa	2978	GUCA1A	guanylate cyclase activator 1A (retina)	miR-320a	1	1	2	GO:0005509(calcium ion binding),GO:0007165(signal transduction),GO:0007601(visual perception),GO:0008048(calcium sensitive guanylate cyclase activator activity),GO:0016020(membrane),GO:0031225(anchored to membrane),GO:0050896(response to stimulus)	ko04740(Olfactory transduction)
NM_000409	hsa	2978	GUCA1A	guanylate cyclase activator 1A (retina)	miR-320b	1	1	2	GO:0005509(calcium ion binding),GO:0007165(signal transduction),GO:0007601(visual perception),GO:0008048(calcium sensitive guanylate cyclase activator activity),GO:0016020(membrane),GO:0031225(anchored to membrane),GO:0050896(response to stimulus)	ko04740(Olfactory transduction)
NM_000409	hsa	2978	GUCA1A	guanylate cyclase activator 1A (retina)	miR-320c	1	1	2	GO:0005509(calcium ion binding),GO:0007165(signal transduction),GO:0007601(visual perception),GO:0008048(calcium sensitive guanylate cyclase activator activity),GO:0016020(membrane),GO:0031225(anchored to membrane),GO:0050896(response to stimulus)	ko04740(Olfactory transduction)
NM_000409	hsa	2978	GUCA1A	guanylate cyclase activator 1A (retina)	miR-3591-3p	1	1	2	GO:0005509(calcium ion binding),GO:0007165(signal transduction),GO:0007601(visual perception),GO:0008048(calcium sensitive guanylate cyclase activator activity),GO:0016020(membrane),GO:0031225(anchored to membrane),GO:0050896(response to stimulus)	ko04740(Olfactory transduction)
NM_000409	hsa	2978	GUCA1A	guanylate cyclase activator 1A (retina)	miR-4277	1	1	2	GO:0005509(calcium ion binding),GO:0007165(signal transduction),GO:0007601(visual perception),GO:0008048(calcium sensitive guanylate cyclase activator activity),GO:0016020(membrane),GO:0031225(anchored to membrane),GO:0050896(response to stimulus)	ko04740(Olfactory transduction)
NM_000410	hsa	3077	HFE	hemochromatosis	miR-494	1	1	2	GO:0002474(antigen processing and presentation of peptide antigen via MHC class I),GO:0005506(iron ion binding),GO:0005515(protein binding),GO:0005737(cytoplasm),GO:0005769(early endosome),GO:0005886(plasma membrane),GO:0005887(integral to plasma membrane),GO:0006461(protein complex assembly),GO:0006811(ion transport),GO:0006826(iron ion transport),GO:0006879(cellular iron ion homeostasis),GO:000…
NM_000411	hsa	3141	HLCS	holocarboxylase synthetase (biotin-(proprionyl-Coenzyme A-carboxylase (ATP-hydrolysing)) ligase)	miR-1260b	1	1	2	GO:0000166(nucleotide binding),GO:0000785(chromatin),GO:0004077(biotin-[acetyl-CoA-carboxylase] ligase activity),GO:0004078(biotin-[methylcrotonoyl-CoA-carboxylase] ligase activity),GO:0004079(biotin-[methylmalonyl-CoA-carboxytransferase] ligase activity),GO:0004080(biotin-[propionyl-CoA-carboxylase (ATP-hydrolyzing)] ligase activity),GO:0005524(ATP binding),GO:0005652(nuclear lamina),GO:0005737(…	ko00780(Biotin metabolism),ko01100(Metabolic pathways)
NM_000411	hsa	3141	HLCS	holocarboxylase synthetase (biotin-(proprionyl-Coenzyme A-carboxylase (ATP-hydrolysing)) ligase)	miR-320a	1	1	2	GO:0000166(nucleotide binding),GO:0000785(chromatin),GO:0004077(biotin-[acetyl-CoA-carboxylase] ligase activity),GO:0004078(biotin-[methylcrotonoyl-CoA-carboxylase] ligase activity),GO:0004079(biotin-[methylmalonyl-CoA-carboxytransferase] ligase activity),GO:0004080(biotin-[propionyl-CoA-carboxylase (ATP-hydrolyzing)] ligase activity),GO:0005524(ATP binding),GO:0005652(nuclear lamina),GO:0005737(…	ko00780(Biotin metabolism),ko01100(Metabolic pathways)
NM_000411	hsa	3141	HLCS	holocarboxylase synthetase (biotin-(proprionyl-Coenzyme A-carboxylase (ATP-hydrolysing)) ligase)	miR-320b	1	1	2	GO:0000166(nucleotide binding),GO:0000785(chromatin),GO:0004077(biotin-[acetyl-CoA-carboxylase] ligase activity),GO:0004078(biotin-[methylcrotonoyl-CoA-carboxylase] ligase activity),GO:0004079(biotin-[methylmalonyl-CoA-carboxytransferase] ligase activity),GO:0004080(biotin-[propionyl-CoA-carboxylase (ATP-hydrolyzing)] ligase activity),GO:0005524(ATP binding),GO:0005652(nuclear lamina),GO:0005737(…	ko00780(Biotin metabolism),ko01100(Metabolic pathways)
NM_000411	hsa	3141	HLCS	holocarboxylase synthetase (biotin-(proprionyl-Coenzyme A-carboxylase (ATP-hydrolysing)) ligase)	miR-320c	1	1	2	GO:0000166(nucleotide binding),GO:0000785(chromatin),GO:0004077(biotin-[acetyl-CoA-carboxylase] ligase activity),GO:0004078(biotin-[methylcrotonoyl-CoA-carboxylase] ligase activity),GO:0004079(biotin-[methylmalonyl-CoA-carboxytransferase] ligase activity),GO:0004080(biotin-[propionyl-CoA-carboxylase (ATP-hydrolyzing)] ligase activity),GO:0005524(ATP binding),GO:0005652(nuclear lamina),GO:0005737(…	ko00780(Biotin metabolism),ko01100(Metabolic pathways)
NM_000411	hsa	3141	HLCS	holocarboxylase synthetase (biotin-(proprionyl-Coenzyme A-carboxylase (ATP-hydrolysing)) ligase)	miR-3591-3p	1	1	2	GO:0000166(nucleotide binding),GO:0000785(chromatin),GO:0004077(biotin-[acetyl-CoA-carboxylase] ligase activity),GO:0004078(biotin-[methylcrotonoyl-CoA-carboxylase] ligase activity),GO:0004079(biotin-[methylmalonyl-CoA-carboxytransferase] ligase activity),GO:0004080(biotin-[propionyl-CoA-carboxylase (ATP-hydrolyzing)] ligase activity),GO:0005524(ATP binding),GO:0005652(nuclear lamina),GO:0005737(…	ko00780(Biotin metabolism),ko01100(Metabolic pathways)
NM_000412	hsa	3273	HRG	histidine-rich glycoprotein	miR-5096	1	1	2	GO:0004867(serine-type endopeptidase inhibitor activity),GO:0004869(cysteine-type endopeptidase inhibitor activity),GO:0005576(extracellular region),GO:0008201(heparin binding),GO:0031093(platelet alpha granule lumen),GO:0051918(negative regulation of fibrinolysis)
NM_000415	hsa	3375	IAPP	islet amyloid polypeptide	miR-103a	1	1	2	GO:0005179(hormone activity),GO:0005576(extracellular region),GO:0005625(soluble fraction),GO:0006915(apoptosis),GO:0007165(signal transduction),GO:0007186(G-protein coupled receptor protein signaling pathway),GO:0007267(cell-cell signaling),GO:0019233(sensory perception of pain),GO:0043025(cell soma),GO:0045596(negative regulation of cell differentiation),GO:0045779(negative regulation of bone r…	ko04950(Maturity onset diabetes of the young)
NM_000415	hsa	3375	IAPP	islet amyloid polypeptide	miR-107	1	1	2	GO:0005179(hormone activity),GO:0005576(extracellular region),GO:0005625(soluble fraction),GO:0006915(apoptosis),GO:0007165(signal transduction),GO:0007186(G-protein coupled receptor protein signaling pathway),GO:0007267(cell-cell signaling),GO:0019233(sensory perception of pain),GO:0043025(cell soma),GO:0045596(negative regulation of cell differentiation),GO:0045779(negative regulation of bone r…	ko04950(Maturity onset diabetes of the young)
NM_000415	hsa	3375	IAPP	islet amyloid polypeptide	miR-5096	1	1	2	GO:0005179(hormone activity),GO:0005576(extracellular region),GO:0005625(soluble fraction),GO:0006915(apoptosis),GO:0007165(signal transduction),GO:0007186(G-protein coupled receptor protein signaling pathway),GO:0007267(cell-cell signaling),GO:0019233(sensory perception of pain),GO:0043025(cell soma),GO:0045596(negative regulation of cell differentiation),GO:0045779(negative regulation of bone r…	ko04950(Maturity onset diabetes of the young)
NM_000417	hsa	3559	IL2RA	interleukin 2 receptor, alpha	miR-30b	1	1	2	GO:0002437(inflammatory response to antigenic stimulus),GO:0004872(receptor activity),GO:0004911(interleukin-2 receptor activity),GO:0005886(plasma membrane),GO:0006924(activation-induced cell death of T cells),GO:0007166(cell surface receptor linked signal transduction),GO:0008283(cell proliferation),GO:0009897(external side of plasma membrane),GO:0016021(integral to membrane),GO:0042104(positiv…	ko04060(Cytokine-cytokine receptor interaction),ko04144(Endocytosis),ko04630(Jak-STAT signaling pathway),ko04640(Hematopoietic cell lineage)
NM_000417	hsa	3559	IL2RA	interleukin 2 receptor, alpha	miR-4277	1	1	2	GO:0002437(inflammatory response to antigenic stimulus),GO:0004872(receptor activity),GO:0004911(interleukin-2 receptor activity),GO:0005886(plasma membrane),GO:0006924(activation-induced cell death of T cells),GO:0007166(cell surface receptor linked signal transduction),GO:0008283(cell proliferation),GO:0009897(external side of plasma membrane),GO:0016021(integral to membrane),GO:0042104(positiv…	ko04060(Cytokine-cytokine receptor interaction),ko04144(Endocytosis),ko04630(Jak-STAT signaling pathway),ko04640(Hematopoietic cell lineage)
NM_000417	hsa	3559	IL2RA	interleukin 2 receptor, alpha	miR-4534	1	1	2	GO:0002437(inflammatory response to antigenic stimulus),GO:0004872(receptor activity),GO:0004911(interleukin-2 receptor activity),GO:0005886(plasma membrane),GO:0006924(activation-induced cell death of T cells),GO:0007166(cell surface receptor linked signal transduction),GO:0008283(cell proliferation),GO:0009897(external side of plasma membrane),GO:0016021(integral to membrane),GO:0042104(positiv…	ko04060(Cytokine-cytokine receptor interaction),ko04144(Endocytosis),ko04630(Jak-STAT signaling pathway),ko04640(Hematopoietic cell lineage)
NM_000419	hsa	3674	ITGA2B	integrin, alpha 2b (platelet glycoprotein IIb of IIb/IIIa complex, antigen CD41)	miR-4443	1	1	2	GO:0004872(receptor activity),GO:0005509(calcium ion binding),GO:0005886(plasma membrane),GO:0005925(focal adhesion),GO:0007155(cell adhesion),GO:0007160(cell-matrix adhesion),GO:0007229(integrin-mediated signaling pathway),GO:0008305(integrin complex),GO:0009897(external side of plasma membrane),GO:0031092(platelet alpha granule membrane),GO:0042802(identical protein binding),GO:0050840(extracel…	ko04510(Focal adhesion),ko04512(ECM-receptor interaction),ko04640(Hematopoietic cell lineage),ko04810(Regulation of actin cytoskeleton),ko05200(Pathways in cancer),ko05222(Small cell lung cancer),ko05410(Hypertrophic cardiomyopathy (HCM)),ko05412(Arrhythmogenic right ventricular cardiomyopathy (ARVC)),ko05414(Dilated cardiomyopathy)
NM_000428	hsa	4053	LTBP2	latent transforming growth factor beta binding protein 2	miR-181d	1	1	2	GO:0005509(calcium ion binding),GO:0005576(extracellular region),GO:0005578(proteinaceous extracellular matrix),GO:0006605(protein targeting),GO:0007179(transforming growth factor beta receptor signaling pathway),GO:0009306(protein secretion),GO:0019838(growth factor binding)
NM_000428	hsa	4053	LTBP2	latent transforming growth factor beta binding protein 2	miR-4443	1	1	2	GO:0005509(calcium ion binding),GO:0005576(extracellular region),GO:0005578(proteinaceous extracellular matrix),GO:0006605(protein targeting),GO:0007179(transforming growth factor beta receptor signaling pathway),GO:0009306(protein secretion),GO:0019838(growth factor binding)
NM_000428	hsa	4053	LTBP2	latent transforming growth factor beta binding protein 2	miR-4530	1	1	2	GO:0005509(calcium ion binding),GO:0005576(extracellular region),GO:0005578(proteinaceous extracellular matrix),GO:0006605(protein targeting),GO:0007179(transforming growth factor beta receptor signaling pathway),GO:0009306(protein secretion),GO:0019838(growth factor binding)
NM_000429	hsa	4143	MAT1A	methionine adenosyltransferase I, alpha	miR-4324	1	1	2	GO:0000166(nucleotide binding),GO:0000287(magnesium ion binding),GO:0004478(methionine adenosyltransferase activity),GO:0005524(ATP binding),GO:0006520(cellular amino acid metabolic process),GO:0006730(one-carbon metabolic process),GO:0016740(transferase activity),GO:0030955(potassium ion binding),GO:0050897(cobalt ion binding)	ko00270(Cysteine and methionine metabolism),ko00450(Selenoamino acid metabolism),ko01100(Metabolic pathways)
NM_000429	hsa	4143	MAT1A	methionine adenosyltransferase I, alpha	miR-5096	1	1	2	GO:0000166(nucleotide binding),GO:0000287(magnesium ion binding),GO:0004478(methionine adenosyltransferase activity),GO:0005524(ATP binding),GO:0006520(cellular amino acid metabolic process),GO:0006730(one-carbon metabolic process),GO:0016740(transferase activity),GO:0030955(potassium ion binding),GO:0050897(cobalt ion binding)	ko00270(Cysteine and methionine metabolism),ko00450(Selenoamino acid metabolism),ko01100(Metabolic pathways)
NM_000430	hsa	5048	PAFAH1B1	platelet-activating factor acetylhydrolase, isoform Ib, subunit 1 (45kDa)	miR-181d	1	1	2	GO:0000132(establishment of mitotic spindle orientation),GO:0000235(astral microtubule),GO:0000776(kinetochore),GO:0001675(acrosome assembly),GO:0001764(neuron migration),GO:0005625(soluble fraction),GO:0005626(insoluble fraction),GO:0005634(nucleus),GO:0005737(cytoplasm),GO:0005813(centrosome),GO:0005819(spindle),GO:0005829(cytosol),GO:0005874(microtubule),GO:0005875(microtubule associated compl…	ko00565(Ether lipid metabolism),ko01100(Metabolic pathways)
NM_000430	hsa	5048	PAFAH1B1	platelet-activating factor acetylhydrolase, isoform Ib, subunit 1 (45kDa)	miR-3591-3p	1	1	2	GO:0000132(establishment of mitotic spindle orientation),GO:0000235(astral microtubule),GO:0000776(kinetochore),GO:0001675(acrosome assembly),GO:0001764(neuron migration),GO:0005625(soluble fraction),GO:0005626(insoluble fraction),GO:0005634(nucleus),GO:0005737(cytoplasm),GO:0005813(centrosome),GO:0005819(spindle),GO:0005829(cytosol),GO:0005874(microtubule),GO:0005875(microtubule associated compl…	ko00565(Ether lipid metabolism),ko01100(Metabolic pathways)
NM_000431	hsa	4598	MVK	mevalonate kinase	miR-3665	1	1	2	GO:0000166(nucleotide binding),GO:0004496(mevalonate kinase activity),GO:0005524(ATP binding),GO:0005737(cytoplasm),GO:0005777(peroxisome),GO:0006695(cholesterol biosynthetic process),GO:0008152(metabolic process),GO:0008299(isoprenoid biosynthetic process),GO:0016310(phosphorylation),GO:0016740(transferase activity),GO:0042802(identical protein binding)	ko00900(Terpenoid backbone biosynthesis),ko01100(Metabolic pathways)
NM_000431	hsa	4598	MVK	mevalonate kinase	miR-4497	1	1	2	GO:0000166(nucleotide binding),GO:0004496(mevalonate kinase activity),GO:0005524(ATP binding),GO:0005737(cytoplasm),GO:0005777(peroxisome),GO:0006695(cholesterol biosynthetic process),GO:0008152(metabolic process),GO:0008299(isoprenoid biosynthetic process),GO:0016310(phosphorylation),GO:0016740(transferase activity),GO:0042802(identical protein binding)	ko00900(Terpenoid backbone biosynthesis),ko01100(Metabolic pathways)
NM_000431	hsa	4598	MVK	mevalonate kinase	miR-4530	1	1	2	GO:0000166(nucleotide binding),GO:0004496(mevalonate kinase activity),GO:0005524(ATP binding),GO:0005737(cytoplasm),GO:0005777(peroxisome),GO:0006695(cholesterol biosynthetic process),GO:0008152(metabolic process),GO:0008299(isoprenoid biosynthetic process),GO:0016310(phosphorylation),GO:0016740(transferase activity),GO:0042802(identical protein binding)	ko00900(Terpenoid backbone biosynthesis),ko01100(Metabolic pathways)
NM_000432	hsa	4633	MYL2	myosin, light chain 2, regulatory, cardiac, slow	miR-4534	1	1	2	GO:0003774(motor activity),GO:0003785(actin monomer binding),GO:0005509(calcium ion binding),GO:0005515(protein binding),GO:0006942(regulation of striated muscle contraction),GO:0008307(structural constituent of muscle),GO:0016459(myosin complex),GO:0030017(sarcomere),GO:0030308(negative regulation of cell growth),GO:0032036(myosin heavy chain binding),GO:0055003(cardiac myofibril assembly),GO:00…	ko04260(Cardiac muscle contraction),ko04510(Focal adhesion),ko04530(Tight junction),ko04670(Leukocyte transendothelial migration),ko04810(Regulation of actin cytoskeleton),ko05410(Hypertrophic cardiomyopathy (HCM)),ko05414(Dilated cardiomyopathy)
NM_000434	hsa	4758	NEU1	sialidase 1 (lysosomal sialidase)	miR-23c	1	1	2	GO:0004308(exo-alpha-sialidase activity),GO:0005515(protein binding),GO:0005886(plasma membrane),GO:0008152(metabolic process),GO:0016023(cytoplasmic membrane-bounded vesicle),GO:0016798(hydrolase activity, acting on glycosyl bonds),GO:0043202(lysosomal lumen)	ko00511(Other glycan degradation),ko00600(Sphingolipid metabolism),ko04142(Lysosome)
NM_000434	hsa	4758	NEU1	sialidase 1 (lysosomal sialidase)	miR-4530	1	1	2	GO:0004308(exo-alpha-sialidase activity),GO:0005515(protein binding),GO:0005886(plasma membrane),GO:0008152(metabolic process),GO:0016023(cytoplasmic membrane-bounded vesicle),GO:0016798(hydrolase activity, acting on glycosyl bonds),GO:0043202(lysosomal lumen)	ko00511(Other glycan degradation),ko00600(Sphingolipid metabolism),ko04142(Lysosome)
NM_000435	hsa	4854	NOTCH3	Notch homolog 3 (Drosophila)	miR-1260b	1	1	2	GO:0004872(receptor activity),GO:0005509(calcium ion binding),GO:0005515(protein binding),GO:0005634(nucleus),GO:0005886(plasma membrane),GO:0007219(Notch signaling pathway),GO:0007275(multicellular organismal development),GO:0016021(integral to membrane),GO:0030900(forebrain development),GO:0042246(tissue regeneration),GO:0045449(regulation of transcription),GO:0045665(negative regulation of neu…	ko04320(Dorso-ventral axis formation),ko04330(Notch signaling pathway)
NM_000436	hsa	5019	OXCT1	3-oxoacid CoA transferase 1	miR-23c	1	1	2	GO:0005739(mitochondrion),GO:0005759(mitochondrial matrix),GO:0008152(metabolic process),GO:0008260(3-oxoacid CoA-transferase activity),GO:0016740(transferase activity),GO:0042803(protein homodimerization activity),GO:0046952(ketone body catabolic process)	ko00072(Synthesis and degradation of ketone bodies),ko00280(Valine,ko leucine and isoleucine degradation),ko00650(Butanoate metabolism)
NM_000436	hsa	5019	OXCT1	3-oxoacid CoA transferase 1	miR-4497	1	1	2	GO:0005739(mitochondrion),GO:0005759(mitochondrial matrix),GO:0008152(metabolic process),GO:0008260(3-oxoacid CoA-transferase activity),GO:0016740(transferase activity),GO:0042803(protein homodimerization activity),GO:0046952(ketone body catabolic process)	ko00072(Synthesis and degradation of ketone bodies),ko00280(Valine,ko leucine and isoleucine degradation),ko00650(Butanoate metabolism)
NM_000436	hsa	5019	OXCT1	3-oxoacid CoA transferase 1	miR-4687-3p	1	1	2	GO:0005739(mitochondrion),GO:0005759(mitochondrial matrix),GO:0008152(metabolic process),GO:0008260(3-oxoacid CoA-transferase activity),GO:0016740(transferase activity),GO:0042803(protein homodimerization activity),GO:0046952(ketone body catabolic process)	ko00072(Synthesis and degradation of ketone bodies),ko00280(Valine,ko leucine and isoleucine degradation),ko00650(Butanoate metabolism)
NM_000437	hsa	5051	PAFAH2	platelet-activating factor acetylhydrolase 2, 40kDa	miR-19b	1	1	2	GO:0003847(1-alkyl-2-acetylglycerophosphocholine esterase activity),GO:0005543(phospholipid binding),GO:0005737(cytoplasm),GO:0006916(anti-apoptosis),GO:0016042(lipid catabolic process),GO:0016787(hydrolase activity)	ko00565(Ether lipid metabolism),ko01100(Metabolic pathways)
NM_000437	hsa	5051	PAFAH2	platelet-activating factor acetylhydrolase 2, 40kDa	miR-5096	1	1	2	GO:0003847(1-alkyl-2-acetylglycerophosphocholine esterase activity),GO:0005543(phospholipid binding),GO:0005737(cytoplasm),GO:0006916(anti-apoptosis),GO:0016042(lipid catabolic process),GO:0016787(hydrolase activity)	ko00565(Ether lipid metabolism),ko01100(Metabolic pathways)
NM_000438	hsa	5077	PAX3	paired box 3	miR-4277	1	1	2	GO:0003700(transcription factor activity),GO:0005515(protein binding),GO:0005634(nucleus),GO:0006355(regulation of transcription, DNA-dependent),GO:0006366(transcription from RNA polymerase II promoter),GO:0006915(apoptosis),GO:0007275(multicellular organismal development),GO:0007605(sensory perception of sound),GO:0009887(organ morphogenesis),GO:0043565(sequence-specific DNA binding)
NM_000439	hsa	5122	PCSK1	proprotein convertase subtilisin/kexin type 1	miR-181d	1	1	2	GO:0004252(serine-type endopeptidase activity),GO:0005509(calcium ion binding),GO:0005615(extracellular space),GO:0005791(rough endoplasmic reticulum),GO:0005802(trans-Golgi network),GO:0006508(proteolysis),GO:0007267(cell-cell signaling),GO:0008152(metabolic process),GO:0008233(peptidase activity),GO:0009749(response to glucose stimulus),GO:0009790(embryonic development),GO:0010157(response to c…
NM_000439	hsa	5122	PCSK1	proprotein convertase subtilisin/kexin type 1	miR-3665	1	1	2	GO:0004252(serine-type endopeptidase activity),GO:0005509(calcium ion binding),GO:0005615(extracellular space),GO:0005791(rough endoplasmic reticulum),GO:0005802(trans-Golgi network),GO:0006508(proteolysis),GO:0007267(cell-cell signaling),GO:0008152(metabolic process),GO:0008233(peptidase activity),GO:0009749(response to glucose stimulus),GO:0009790(embryonic development),GO:0010157(response to c…
NM_000440	hsa	5145	PDE6A	phosphodiesterase 6A, cGMP-specific, rod, alpha	miR-320a	1	1	2	GO:0005886(plasma membrane),GO:0007165(signal transduction),GO:0007601(visual perception),GO:0016787(hydrolase activity),GO:0047555(3',5'-cyclic-GMP phosphodiesterase activity),GO:0050896(response to stimulus)
NM_000440	hsa	5145	PDE6A	phosphodiesterase 6A, cGMP-specific, rod, alpha	miR-320b	1	1	2	GO:0005886(plasma membrane),GO:0007165(signal transduction),GO:0007601(visual perception),GO:0016787(hydrolase activity),GO:0047555(3',5'-cyclic-GMP phosphodiesterase activity),GO:0050896(response to stimulus)
NM_000440	hsa	5145	PDE6A	phosphodiesterase 6A, cGMP-specific, rod, alpha	miR-320c	1	1	2	GO:0005886(plasma membrane),GO:0007165(signal transduction),GO:0007601(visual perception),GO:0016787(hydrolase activity),GO:0047555(3',5'-cyclic-GMP phosphodiesterase activity),GO:0050896(response to stimulus)
NM_000440	hsa	5145	PDE6A	phosphodiesterase 6A, cGMP-specific, rod, alpha	miR-4277	1	1	2	GO:0005886(plasma membrane),GO:0007165(signal transduction),GO:0007601(visual perception),GO:0016787(hydrolase activity),GO:0047555(3',5'-cyclic-GMP phosphodiesterase activity),GO:0050896(response to stimulus)
NM_000440	hsa	5145	PDE6A	phosphodiesterase 6A, cGMP-specific, rod, alpha	miR-4534	1	1	2	GO:0005886(plasma membrane),GO:0007165(signal transduction),GO:0007601(visual perception),GO:0016787(hydrolase activity),GO:0047555(3',5'-cyclic-GMP phosphodiesterase activity),GO:0050896(response to stimulus)
NM_000440	hsa	5145	PDE6A	phosphodiesterase 6A, cGMP-specific, rod, alpha	miR-5096	1	1	2	GO:0005886(plasma membrane),GO:0007165(signal transduction),GO:0007601(visual perception),GO:0016787(hydrolase activity),GO:0047555(3',5'-cyclic-GMP phosphodiesterase activity),GO:0050896(response to stimulus)
NM_000441	hsa	5172	SLC26A4	solute carrier family 26, member 4	miR-103a	1	1	2	GO:0005215(transporter activity),GO:0006885(regulation of pH),GO:0007605(sensory perception of sound),GO:0008271(secondary active sulfate transmembrane transporter activity),GO:0008272(sulfate transport),GO:0015108(chloride transmembrane transporter activity),GO:0015111(iodide transmembrane transporter activity),GO:0016020(membrane),GO:0016021(integral to membrane),GO:0016324(apical plasma membra…
NM_000441	hsa	5172	SLC26A4	solute carrier family 26, member 4	miR-107	1	1	2	GO:0005215(transporter activity),GO:0006885(regulation of pH),GO:0007605(sensory perception of sound),GO:0008271(secondary active sulfate transmembrane transporter activity),GO:0008272(sulfate transport),GO:0015108(chloride transmembrane transporter activity),GO:0015111(iodide transmembrane transporter activity),GO:0016020(membrane),GO:0016021(integral to membrane),GO:0016324(apical plasma membra…
NM_000441	hsa	5172	SLC26A4	solute carrier family 26, member 4	miR-181d	1	1	2	GO:0005215(transporter activity),GO:0006885(regulation of pH),GO:0007605(sensory perception of sound),GO:0008271(secondary active sulfate transmembrane transporter activity),GO:0008272(sulfate transport),GO:0015108(chloride transmembrane transporter activity),GO:0015111(iodide transmembrane transporter activity),GO:0016020(membrane),GO:0016021(integral to membrane),GO:0016324(apical plasma membra…
NM_000441	hsa	5172	SLC26A4	solute carrier family 26, member 4	miR-19b	1	1	2	GO:0005215(transporter activity),GO:0006885(regulation of pH),GO:0007605(sensory perception of sound),GO:0008271(secondary active sulfate transmembrane transporter activity),GO:0008272(sulfate transport),GO:0015108(chloride transmembrane transporter activity),GO:0015111(iodide transmembrane transporter activity),GO:0016020(membrane),GO:0016021(integral to membrane),GO:0016324(apical plasma membra…
NM_000441	hsa	5172	SLC26A4	solute carrier family 26, member 4	miR-3591-3p	1	1	2	GO:0005215(transporter activity),GO:0006885(regulation of pH),GO:0007605(sensory perception of sound),GO:0008271(secondary active sulfate transmembrane transporter activity),GO:0008272(sulfate transport),GO:0015108(chloride transmembrane transporter activity),GO:0015111(iodide transmembrane transporter activity),GO:0016020(membrane),GO:0016021(integral to membrane),GO:0016324(apical plasma membra…
NM_000441	hsa	5172	SLC26A4	solute carrier family 26, member 4	miR-4687-3p	1	1	2	GO:0005215(transporter activity),GO:0006885(regulation of pH),GO:0007605(sensory perception of sound),GO:0008271(secondary active sulfate transmembrane transporter activity),GO:0008272(sulfate transport),GO:0015108(chloride transmembrane transporter activity),GO:0015111(iodide transmembrane transporter activity),GO:0016020(membrane),GO:0016021(integral to membrane),GO:0016324(apical plasma membra…
NM_000442	hsa	5175	PECAM1	platelet/endothelial cell adhesion molecule	miR-1246	1	1	2	GO:0005515(protein binding),GO:0005615(extracellular space),GO:0005886(plasma membrane),GO:0007155(cell adhesion),GO:0007165(signal transduction),GO:0008037(cell recognition),GO:0016021(integral to membrane),GO:0031092(platelet alpha granule membrane)	ko04514(Cell adhesion molecules (CAMs)),ko04670(Leukocyte transendothelial migration)
NM_000442	hsa	5175	PECAM1	platelet/endothelial cell adhesion molecule	miR-4324	1	1	2	GO:0005515(protein binding),GO:0005615(extracellular space),GO:0005886(plasma membrane),GO:0007155(cell adhesion),GO:0007165(signal transduction),GO:0008037(cell recognition),GO:0016021(integral to membrane),GO:0031092(platelet alpha granule membrane)	ko04514(Cell adhesion molecules (CAMs)),ko04670(Leukocyte transendothelial migration)
NM_000442	hsa	5175	PECAM1	platelet/endothelial cell adhesion molecule	miR-494	1	1	2	GO:0005515(protein binding),GO:0005615(extracellular space),GO:0005886(plasma membrane),GO:0007155(cell adhesion),GO:0007165(signal transduction),GO:0008037(cell recognition),GO:0016021(integral to membrane),GO:0031092(platelet alpha granule membrane)	ko04514(Cell adhesion molecules (CAMs)),ko04670(Leukocyte transendothelial migration)
NM_000444	hsa	5251	PHEX	phosphate regulating endopeptidase homolog, X-linked	miR-494	1	1	2	GO:0001501(skeletal system development),GO:0004177(aminopeptidase activity),GO:0004222(metalloendopeptidase activity),GO:0005886(plasma membrane),GO:0005887(integral to plasma membrane),GO:0006464(protein modification process),GO:0006508(proteolysis),GO:0007267(cell-cell signaling),GO:0008233(peptidase activity),GO:0008270(zinc ion binding),GO:0031214(biomineral formation),GO:0046872(metal ion bi…
NM_000445	hsa	5339	PLEC1	plectin 1, intermediate filament binding protein 500kDa	miR-4443	1	1	2	GO:0003779(actin binding),GO:0005626(insoluble fraction),GO:0005737(cytoplasm),GO:0005829(cytosol),GO:0005856(cytoskeleton),GO:0005886(plasma membrane),GO:0008307(structural constituent of muscle),GO:0031581(hemidesmosome assembly),GO:0043292(contractile fiber)
NM_000447	hsa	5664	PSEN2	presenilin 2 (Alzheimer disease 4)	miR-4530	1	1	2	GO:0001666(response to hypoxia),GO:0001708(cell fate specification),GO:0001756(somitogenesis),GO:0001933(negative regulation of protein amino acid phosphorylation),GO:0001942(hair follicle development),GO:0002244(hemopoietic progenitor cell differentiation),GO:0002286(T cell activation during immune response),GO:0002573(myeloid leukocyte differentiation),GO:0004175(endopeptidase activity),GO:0005…	ko04330(Notch signaling pathway),ko05010(Alzheimer's disease)
NM_000448	hsa	5896	RAG1	recombination activating gene 1	miR-30b	1	1	2	GO:0003677(DNA binding),GO:0004519(endonuclease activity),GO:0005515(protein binding),GO:0005622(intracellular),GO:0005634(nucleus),GO:0006310(DNA recombination),GO:0006955(immune response),GO:0008270(zinc ion binding),GO:0016265(death),GO:0016787(hydrolase activity),GO:0030183(B cell differentiation),GO:0033077(T cell differentiation in the thymus),GO:0033151(V(D)J recombination),GO:0043154(nega…	ko05340(Primary immunodeficiency)
NM_000448	hsa	5896	RAG1	recombination activating gene 1	miR-4687-3p	1	1	2	GO:0003677(DNA binding),GO:0004519(endonuclease activity),GO:0005515(protein binding),GO:0005622(intracellular),GO:0005634(nucleus),GO:0006310(DNA recombination),GO:0006955(immune response),GO:0008270(zinc ion binding),GO:0016265(death),GO:0016787(hydrolase activity),GO:0030183(B cell differentiation),GO:0033077(T cell differentiation in the thymus),GO:0033151(V(D)J recombination),GO:0043154(nega…	ko05340(Primary immunodeficiency)
NM_000449	hsa	5993	RFX5	regulatory factor X, 5 (influences HLA class II expression)	miR-19b	1	1	2	GO:0000122(negative regulation of transcription from RNA polymerase II promoter),GO:0003700(transcription factor activity),GO:0005515(protein binding),GO:0005634(nucleus),GO:0006355(regulation of transcription, DNA-dependent)	ko04612(Antigen processing and presentation),ko05340(Primary immunodeficiency)
NM_000450	hsa	6401	SELE	selectin E	miR-181d	1	1	2	GO:0002092(positive regulation of receptor internalization),GO:0002523(leukocyte migration during inflammatory response),GO:0004888(transmembrane receptor activity),GO:0005515(protein binding),GO:0005529(sugar binding),GO:0005615(extracellular space),GO:0005886(plasma membrane),GO:0005901(caveola),GO:0005905(coated pit),GO:0007155(cell adhesion),GO:0007157(heterophilic cell adhesion),GO:0007202(a…	ko04514(Cell adhesion molecules (CAMs))
NM_000450	hsa	6401	SELE	selectin E	miR-4324	1	1	2	GO:0002092(positive regulation of receptor internalization),GO:0002523(leukocyte migration during inflammatory response),GO:0004888(transmembrane receptor activity),GO:0005515(protein binding),GO:0005529(sugar binding),GO:0005615(extracellular space),GO:0005886(plasma membrane),GO:0005901(caveola),GO:0005905(coated pit),GO:0007155(cell adhesion),GO:0007157(heterophilic cell adhesion),GO:0007202(a…	ko04514(Cell adhesion molecules (CAMs))
NM_000451	hsa	6473	SHOX	short stature homeobox	miR-4497	1	1	2	GO:0001501(skeletal system development),GO:0003700(transcription factor activity),GO:0005634(nucleus),GO:0006355(regulation of transcription, DNA-dependent),GO:0006366(transcription from RNA polymerase II promoter),GO:0007275(multicellular organismal development),GO:0043565(sequence-specific DNA binding)
NM_000451	hsa	6473	SHOX	short stature homeobox	miR-4534	1	1	2	GO:0001501(skeletal system development),GO:0003700(transcription factor activity),GO:0005634(nucleus),GO:0006355(regulation of transcription, DNA-dependent),GO:0006366(transcription from RNA polymerase II promoter),GO:0007275(multicellular organismal development),GO:0043565(sequence-specific DNA binding)
NM_000452	hsa	6555	SLC10A2	solute carrier family 10 (sodium/bile acid cotransporter family), member 2	miR-4455	1	1	2	GO:0000502(proteasome complex),GO:0005634(nucleus),GO:0005886(plasma membrane),GO:0005887(integral to plasma membrane),GO:0006811(ion transport),GO:0006814(sodium ion transport),GO:0008508(bile acid:sodium symporter activity),GO:0015293(symporter activity),GO:0015711(organic anion transport),GO:0015721(bile acid and bile salt transport),GO:0016324(apical plasma membrane),GO:0031402(sodium ion bin…
NM_000452	hsa	6555	SLC10A2	solute carrier family 10 (sodium/bile acid cotransporter family), member 2	miR-4530	1	1	2	GO:0000502(proteasome complex),GO:0005634(nucleus),GO:0005886(plasma membrane),GO:0005887(integral to plasma membrane),GO:0006811(ion transport),GO:0006814(sodium ion transport),GO:0008508(bile acid:sodium symporter activity),GO:0015293(symporter activity),GO:0015711(organic anion transport),GO:0015721(bile acid and bile salt transport),GO:0016324(apical plasma membrane),GO:0031402(sodium ion bin…
NM_000453	hsa	6528	SLC5A5	solute carrier family 5 (sodium iodide symporter), member 5	miR-3665	1	1	2	GO:0005215(transporter activity),GO:0005886(plasma membrane),GO:0006811(ion transport),GO:0006814(sodium ion transport),GO:0008507(sodium:iodide symporter activity),GO:0015111(iodide transmembrane transporter activity),GO:0015293(symporter activity),GO:0015705(iodide transport),GO:0016021(integral to membrane),GO:0031402(sodium ion binding),GO:0055085(transmembrane transport)
NM_000453	hsa	6528	SLC5A5	solute carrier family 5 (sodium iodide symporter), member 5	miR-4277	1	1	2	GO:0005215(transporter activity),GO:0005886(plasma membrane),GO:0006811(ion transport),GO:0006814(sodium ion transport),GO:0008507(sodium:iodide symporter activity),GO:0015111(iodide transmembrane transporter activity),GO:0015293(symporter activity),GO:0015705(iodide transport),GO:0016021(integral to membrane),GO:0031402(sodium ion binding),GO:0055085(transmembrane transport)
NM_000453	hsa	6528	SLC5A5	solute carrier family 5 (sodium iodide symporter), member 5	miR-4324	1	1	2	GO:0005215(transporter activity),GO:0005886(plasma membrane),GO:0006811(ion transport),GO:0006814(sodium ion transport),GO:0008507(sodium:iodide symporter activity),GO:0015111(iodide transmembrane transporter activity),GO:0015293(symporter activity),GO:0015705(iodide transport),GO:0016021(integral to membrane),GO:0031402(sodium ion binding),GO:0055085(transmembrane transport)
[truncated: 61,773 more rows]
